# Supplementary material for: Detection of gluten peptides in human duodenal fluids with immuno-liquid chromatography-mass spectrometry
Source: Royal Society of Chemistry journal article supplement (doi:10.1039/d4ay00852a), 2024-01-01
Supplement: d4ay00852a1.xlsx [file d4ay00852a1.xlsx]

## Sheet: SI_IDs_Gluten_Product
Gluten_Product, Samples report created on 11/29/2022
Experiment: Gluten_Product
	Peak List Generator: unknown
		Version: unknown
		Charge States Calculated: unknown
		Deisotoped: unknown
		Textual Annotation: unknown
	Database Set: 2 Databases
		Database Name: a subset of the SP2019_05_All_20190520 database
			Version: unknown
			Taxonomy: All Entries
			Number of Proteins: 15513
		Database Name: the SP2019_05_All_20190520 database
			Version: unknown
			Taxonomy: All Entries
			Number of Proteins: 560118
		Does database contain common contaminants?: unknown
	Search Engine Set: 2 Search Engines
		Search Engine: Mascot
			Version: 2.6.1
			Samples: All Samples
			Fragment Tolerance: 0.60 Da (Monoisotopic)
			Parent Tolerance: 10.0 PPM (Monoisotopic)
			Fixed Modifications: +57 on C (Carbamidomethyl)
			Variable Modifications: +1 on NQ (Deamidated), +16 on M (Oxidation)
			Database: the SP2019_05_All_20190520 database (unknown version, 560118 entries)
			Digestion Enzyme: Trypsin
			Max Missed Cleavages: 2
			Probability Model:
				Mudpit_File Name: Gluten_Product_1_01.raw (F087216): LFDR Model, Classifier data: Bayes, Good (50%) IonScore - IdentityScore m:23.7/s:15.5 Ion Score m:60.4/s:15.9 Identity Score m:NA Homology Score m:NA Delta Ion Score m:NA, Bad (50%) IonScore - IdentityScore m:-13.3/s:6.79 Ion Score m:20.5/s:8.16 Identity Score m:NA Homology Score m:NA Delta Ion Score m:NA [all charge states]
		Search Engine: X! Tandem
			Version: X! Tandem Alanine (2017.2.1.4)
			Samples: All Samples
			Fragment Tolerance: 0.60 Da (Monoisotopic)
			Parent Tolerance: 10.0 PPM (Monoisotopic)
			Fixed Modifications: +57 on C (Carbamidomethyl)
			Variable Modifications: -18 on Peptide N-Terminal (Glu->pyro-Glu), -17 on Peptide N-Terminal (Ammonia-loss), -17 on Peptide N-Terminal (Gln->pyro-Glu), +1 on NQ (Deamidated), +16 on M (Oxidation)
			Database: a subset of the SP2019_05_All_20190520 database (unknown version, 15513 entries)
			Digestion Enzyme: Trypsin
			Max Missed Cleavages: 2
			Probability Model:
				Mudpit_File Name: Gluten_Product_1_01.raw (F087216): Peptide Prophet with Delta Mass Correction (No decoys found) [all charge states]
	Scaffold: Version: Scaffold_5.0.0
		Modification Metadata Set: 2334 modifications
			Source: C:\Program Files\Scaffold 4\parameters\unimod.xml
			Comment:
		Protein Grouping Strategy: Experiment-wide grouping with binary peptide-protein weights
		Peptide Thresholds: 5.0 % minimum
		Protein Thresholds: 98.0 % minimum and 2 peptides minimum
		Peptide FDR: 0.6 % (Decoy)
		Protein FDR: 1.0 % (Decoy)
		GO Annotation Source(s):
		Pathway Annotation Source(s):
		Alternate ID Source(s): FASTA:UniProt/Swiss-Prot (UniProtKB old)
									Exclusive Unique Peptide Count
Gluten_Product									Uncategorized Sample
#	Visible?	Starred?	Identified Proteins (621)	Accession Number	Alternate ID	Molecular Weight	Protein Grouping Ambiguity	Taxonomy	Gluten Product
1	TRUE	Empty	Glutenin, high molecular weight subunit DY10 OS=Triticum aestivum OX=4565 GN=GLU-D1-2B PE=3 SV=1	GLT0_WHEAT	GLU-D1-2B	70 kDa	TRUE	unknown	25
2	TRUE	Empty	Lysyl endopeptidase OS=Pseudomonas aeruginosa (strain UCBPP-PA14) OX=208963 GN=prpL PE=1 SV=1	LYSC_PSEAB	prpL	48 kDa		unknown	23
3	TRUE	Empty	Gamma-gliadin (Fragment) OS=Triticum aestivum OX=4565 PE=2 SV=1	GDB3_WHEAT		27 kDa	TRUE	unknown	11
4	TRUE	Empty	Sucrose synthase 2 OS=Hordeum vulgare OX=4513 GN=SS2 PE=1 SV=1	SUS2_HORVU	SS2	93 kDa	TRUE	unknown	35
5	TRUE	Empty	Serpin-Z1B OS=Triticum aestivum OX=4565 PE=1 SV=1	SPZ1B_WHEAT		43 kDa	TRUE	unknown	25
6	TRUE	Empty	Glutenin, low molecular weight subunit OS=Triticum aestivum OX=4565 PE=3 SV=1	GLTA_WHEAT		41 kDa		unknown	10
7	TRUE	Empty	Glucose-1-phosphate adenylyltransferase large subunit, chloroplastic/amyloplastic OS=Triticum aestivum OX=4565 GN=AGP-L PE=2 SV=2	GLGL2_WHEAT	AGP-L	58 kDa	TRUE	unknown	35
8	TRUE	Empty	Sucrose synthase 1 OS=Hordeum vulgare OX=4513 GN=SS1 PE=1 SV=1	SUS1_HORVU	SS1	92 kDa	TRUE	unknown	43
9	TRUE	Empty	Avenin-like b1 OS=Triticum aestivum OX=4565 GN=AVNLB PE=1 SV=1	AVLB1_WHEAT	AVNLB	33 kDa	TRUE	unknown	14
10	TRUE	Empty	Alpha-amylase inhibitor 0.19 OS=Triticum aestivum OX=4565 PE=1 SV=1	IAA1_WHEAT		13 kDa	TRUE	unknown	15
11	TRUE	Empty	Alpha-amylase/trypsin inhibitor CM3 OS=Triticum aestivum OX=4565 PE=1 SV=1	IAAC3_WHEAT		18 kDa	TRUE	unknown	19
12	TRUE	Empty	Keratin, type II cytoskeletal 1 OS=Homo sapiens OX=9606 GN=KRT1 PE=1 SV=6	K2C1_HUMAN	KRT1	66 kDa	TRUE	unknown	38
13	TRUE	Empty	Beta-amylase OS=Hordeum vulgare subsp. spontaneum OX=77009 GN=BMY1 PE=1 SV=1	AMYB_HORVS	BMY1	60 kDa	TRUE	unknown	18
14	TRUE	Empty	Glucose-1-phosphate adenylyltransferase small subunit, chloroplastic/amyloplastic OS=Triticum aestivum OX=4565 GN=AGP-S PE=2 SV=1	GLGS_WHEAT	AGP-S	52 kDa	TRUE	unknown	24
15	TRUE	Empty	Protein disulfide-isomerase OS=Triticum aestivum OX=4565 GN=PDI PE=2 SV=1	PDI_WHEAT	PDI	57 kDa	TRUE	unknown	37
16	TRUE	Empty	Glutenin, high molecular weight subunit DX5 OS=Triticum aestivum OX=4565 GN=GLU-1D-1D PE=3 SV=5	GLT5_WHEAT	GLU-1D-1D	90 kDa		unknown	13
17	TRUE	Empty	Clathrin heavy chain 1 OS=Oryza sativa subsp. japonica OX=39947 GN=Os11g0104900 PE=3 SV=1	CLH1_ORYSJ (+1)	Os11g0104900	193 kDa	TRUE	unknown	38
18	TRUE	Empty	Elongation factor 1-alpha OS=Triticum aestivum OX=4565 GN=TEF1 PE=2 SV=1	EF1A_WHEAT	TEF1	49 kDa	TRUE	unknown	25
19	TRUE	Empty	Eukaryotic initiation factor 4A OS=Triticum aestivum OX=4565 PE=2 SV=1	IF4A_WHEAT		47 kDa	TRUE	unknown	25
20	TRUE	Empty	Heat shock protein 81-1 OS=Oryza sativa subsp. indica OX=39946 GN=HSP81-1 PE=2 SV=1	HSP81_ORYSI (+1)	HSP81-1	80 kDa	TRUE	unknown	27
21	TRUE	Empty	Keratin, type I cytoskeletal 10 OS=Homo sapiens OX=9606 GN=KRT10 PE=1 SV=6	K1C10_HUMAN	KRT10	59 kDa	TRUE	unknown	26
22	TRUE	Empty	Tubulin beta-3 chain OS=Triticum aestivum OX=4565 GN=TUBB3 PE=2 SV=1	TBB3_WHEAT	TUBB3	50 kDa	TRUE	unknown	23
23	TRUE	Empty	Keratin, type I cytoskeletal 9 OS=Homo sapiens OX=9606 GN=KRT9 PE=1 SV=3	K1C9_HUMAN	KRT9	62 kDa	TRUE	unknown	24
24	TRUE	Empty	Keratin, type II cytoskeletal 2 epidermal OS=Homo sapiens OX=9606 GN=KRT2 PE=1 SV=2	K22E_HUMAN	KRT2	65 kDa	TRUE	unknown	30
25	TRUE	Empty	Alpha-amylase inhibitor 0.28 OS=Triticum aestivum OX=4565 GN=IMA1 PE=1 SV=3	IAA2_WHEAT	IMA1	17 kDa		unknown	13
26	TRUE	Empty	Phosphoglycerate kinase, cytosolic OS=Triticum aestivum OX=4565 PE=2 SV=1	PGKY_WHEAT		42 kDa		unknown	27
27	TRUE	Empty	Granule-bound starch synthase 1, chloroplastic/amyloplastic OS=Triticum aestivum OX=4565 GN=WAXY PE=1 SV=1	SSG1_WHEAT	WAXY	68 kDa	TRUE	unknown	22
28	TRUE	Empty	Pyruvate, phosphate dikinase 1, chloroplastic OS=Oryza sativa subsp. japonica OX=39947 GN=PPDK1 PE=1 SV=1	PPDK1_ORYSJ	PPDK1	103 kDa	TRUE	unknown	18
29	TRUE	Empty	Elongation factor 2 OS=Arabidopsis thaliana OX=3702 GN=LOS1 PE=1 SV=1	EF2_ARATH	LOS1	94 kDa	TRUE	unknown	21
30	TRUE	Empty	Formate dehydrogenase, mitochondrial OS=Hordeum vulgare OX=4513 PE=2 SV=1	FDH_HORVU		42 kDa	TRUE	unknown	16
31	TRUE	Empty	Avenin-like a1 OS=Triticum aestivum OX=4565 GN=AVNLA PE=2 SV=1	AVLA1_WHEAT	AVNLA	18 kDa	TRUE	unknown	7
32	TRUE	Empty	Avenin-like b3 OS=Triticum aestivum OX=4565 PE=2 SV=1	AVLB3_WHEAT (+4)		32 kDa	TRUE	unknown	6
33	TRUE	Empty	Puroindoline-A OS=Triticum aestivum OX=4565 GN=PINA PE=1 SV=2	PUIA_WHEAT	PINA	16 kDa		unknown	8
34	TRUE	Empty	Tubulin alpha-2 chain OS=Hordeum vulgare OX=4513 GN=TUBA2 PE=2 SV=1	TBA2_HORVU (+1)	TUBA2	50 kDa	TRUE	unknown	18
35	TRUE	Empty	UTP--glucose-1-phosphate uridylyltransferase OS=Hordeum vulgare OX=4513 PE=2 SV=1	UGPA_HORVU		52 kDa	TRUE	unknown	22
36	TRUE	Empty	Chaperone protein ClpB1 OS=Oryza sativa subsp. japonica OX=39947 GN=CLPB1 PE=2 SV=1	CLPB1_ORYSJ	CLPB1	101 kDa	TRUE	unknown	23
37	TRUE	Empty	Heat shock 70 kDa protein BIP1 OS=Oryza sativa subsp. japonica OX=39947 GN=BIP1 PE=1 SV=1	BIP1_ORYSJ	BIP1	73 kDa	TRUE	unknown	21
38	TRUE	Empty	Phosphoenolpyruvate carboxylase 2 OS=Sorghum bicolor OX=4558 PE=3 SV=1	CAPP2_SORBI		110 kDa	TRUE	unknown	25
39	TRUE	Empty	Aspartate aminotransferase, cytoplasmic OS=Oryza sativa subsp. japonica OX=39947 GN=Os01g0760600 PE=2 SV=1	AATC_ORYSJ	Os01g0760600	45 kDa	TRUE	unknown	16
40	TRUE	Empty	Glyceraldehyde-3-phosphate dehydrogenase 2, cytosolic (Fragment) OS=Hordeum vulgare OX=4513 GN=GAPC PE=2 SV=1	G3PC2_HORVU	GAPC	33 kDa	TRUE	unknown	16
41	TRUE	Empty	Alpha-amylase/trypsin inhibitor CM16 OS=Triticum aestivum OX=4565 PE=1 SV=1	IAC16_WHEAT		16 kDa		unknown	8
42	TRUE	Empty	Endoplasmin homolog OS=Hordeum vulgare OX=4513 PE=2 SV=1	ENPL_HORVU		93 kDa	TRUE	unknown	23
43	TRUE	Empty	Alpha-1-purothionin (Fragment) OS=Triticum aestivum OX=4565 GN=THI1.1 PE=1 SV=2	THN1_WHEAT	THI1	14 kDa	TRUE	unknown	9
44	TRUE	Empty	Probable mediator of RNA polymerase II transcription subunit 37e OS=Arabidopsis thaliana OX=3702 GN=MED37E PE=1 SV=3	MD37E_ARATH	MED37E	71 kDa	TRUE	unknown	15
45	TRUE	Empty	Enolase OS=Oryza sativa subsp. japonica OX=39947 GN=ENO1 PE=1 SV=2	ENO_ORYSJ	ENO1	48 kDa	TRUE	unknown	17
46	TRUE	Empty	60S ribosomal protein L3 OS=Oryza sativa subsp. japonica OX=39947 GN=RPL3 PE=2 SV=2	RL3_ORYSJ	RPL3	44 kDa		unknown	15
47	TRUE	Empty	Glyceraldehyde-3-phosphate dehydrogenase 1, cytosolic OS=Hordeum vulgare OX=4513 GN=GAPC PE=2 SV=1	G3PC1_HORVU	GAPC	37 kDa	TRUE	unknown	11
48	TRUE	Empty	14-3-3-like protein A OS=Hordeum vulgare OX=4513 PE=2 SV=1	1433A_HORVU		29 kDa	TRUE	unknown	18
49	TRUE	Empty	Endogenous alpha-amylase/subtilisin inhibitor OS=Triticum aestivum OX=4565 PE=1 SV=1	IAAS_WHEAT		20 kDa		unknown	13
50	TRUE	Empty	Actin-2 OS=Oryza sativa subsp. indica OX=39946 GN=ACT2 PE=3 SV=1	ACT2_ORYSI (+1)	ACT2	42 kDa	TRUE	unknown	17
51	TRUE	Empty	ATP synthase subunit beta, mitochondrial OS=Nicotiana plumbaginifolia OX=4092 GN=ATPB PE=1 SV=1	ATPBM_NICPL	ATPB	60 kDa	TRUE	unknown	15
52	TRUE	Empty	Alanine aminotransferase 2 OS=Hordeum vulgare OX=4513 PE=1 SV=1	ALA2_HORVU		53 kDa	TRUE	unknown	16
53	TRUE	Empty	Cell division cycle protein 48 homolog OS=Glycine max OX=3847 GN=CDC48 PE=2 SV=1	CDC48_SOYBN	CDC48	90 kDa	TRUE	unknown	18
54	TRUE	Empty	B2WKR4-DECOY	B2WKR4-DECOY (+1)		?		unknown	2
55	TRUE	Empty	1,4-alpha-glucan-branching enzyme, chloroplastic/amyloplastic OS=Oryza sativa subsp. japonica OX=39947 GN=SBE1 PE=1 SV=2	GLGB_ORYSJ	SBE1	93 kDa		unknown	15
56	TRUE	Empty	Phosphoglucomutase, cytoplasmic OS=Bromus inermis OX=15371 GN=PGM1 PE=2 SV=1	PGMC_BROIN	PGM1	63 kDa	TRUE	unknown	14
57	TRUE	Empty	Serpin-Z1A OS=Triticum aestivum OX=4565 GN=WZCI PE=1 SV=1	SPZ1A_WHEAT	WZCI	43 kDa	TRUE	unknown	8
58	TRUE	Empty	Triosephosphate isomerase, cytosolic OS=Secale cereale OX=4550 PE=2 SV=3	TPIS_SECCE		27 kDa	TRUE	unknown	11
59	TRUE	Empty	Avenin-like a4 OS=Triticum aestivum OX=4565 PE=2 SV=1	AVLA4_WHEAT		19 kDa	TRUE	unknown	4
60	TRUE	Empty	Carbonic anhydrase, chloroplastic OS=Hordeum vulgare OX=4513 PE=2 SV=1	CAHC_HORVU		35 kDa		unknown	11
61	TRUE	Empty	Gamma-gliadin OS=Triticum aestivum OX=4565 PE=3 SV=1	GDB2_WHEAT		37 kDa		unknown	4
62	TRUE	Empty	Adenosylhomocysteinase OS=Triticum aestivum OX=4565 GN=SAHH PE=2 SV=1	SAHH_WHEAT	SAHH	53 kDa	TRUE	unknown	14
63	TRUE	Empty	Serpin-Z2B OS=Triticum aestivum OX=4565 PE=1 SV=1	SPZ2B_WHEAT		43 kDa	TRUE	unknown	11
64	TRUE	Empty	Elongation factor 1-beta OS=Triticum aestivum OX=4565 PE=1 SV=2	EF1B_WHEAT		23 kDa		unknown	9
65	TRUE	Empty	Serpin-Z2A OS=Triticum aestivum OX=4565 PE=1 SV=1	SPZ2A_WHEAT		43 kDa	TRUE	unknown	12
66	TRUE	Empty	ATP synthase subunit alpha, mitochondrial OS=Triticum aestivum OX=4565 GN=ATPA PE=3 SV=1	ATPAM_WHEAT	ATPA	55 kDa	TRUE	unknown	15
67	TRUE	Empty	Catalase isozyme 1 OS=Hordeum vulgare OX=4513 GN=CAT1 PE=2 SV=1	CATA1_HORVU	CAT1	57 kDa	TRUE	unknown	15
68	TRUE	Empty	1,4-alpha-glucan-branching enzyme 1, chloroplastic/amyloplastic OS=Pisum sativum OX=3888 GN=SBEI PE=1 SV=1	GLGB1_PEA	SBEI	105 kDa	TRUE	unknown	9
69	TRUE	Empty	Alpha-amylase/trypsin inhibitor CM1 OS=Triticum aestivum OX=4565 PE=1 SV=1	IAAC1_WHEAT		16 kDa	TRUE	unknown	9
70	TRUE	Empty	Gamma-gliadin B-I OS=Triticum aestivum OX=4565 PE=2 SV=1	GDB1_WHEAT		34 kDa	TRUE	unknown	2
71	TRUE	Empty	Heat shock 70 kDa protein 7, chloroplastic OS=Arabidopsis thaliana OX=3702 GN=HSP70-7 PE=2 SV=1	HSP7G_ARATH	HSP70-7	77 kDa	TRUE	unknown	12
72	TRUE	Empty	Malate dehydrogenase 1, cytoplasmic OS=Arabidopsis thaliana OX=3702 GN=MDH1 PE=1 SV=2	MDHC1_ARATH	MDH1	36 kDa	TRUE	unknown	10
73	TRUE	Empty	GTP-binding nuclear protein Ran-2 OS=Oryza sativa subsp. indica OX=39946 GN=RAN2 PE=2 SV=1	RAN2_ORYSI (+1)	RAN2	25 kDa		unknown	14
74	TRUE	Empty	Gamma-gliadin B OS=Triticum aestivum OX=4565 PE=3 SV=1	GDBB_WHEAT		33 kDa		unknown	7
75	TRUE	Empty	Alcohol dehydrogenase 1 OS=Cenchrus americanus OX=4543 GN=ADH1 PE=2 SV=1	ADH1_CENAM	ADH1	41 kDa	TRUE	unknown	10
76	TRUE	Empty	Fructose-bisphosphate aldolase 2, cytoplasmic OS=Oryza sativa subsp. japonica OX=39947 GN=FBA2 PE=2 SV=1	ALFC2_ORYSJ	FBA2	39 kDa	TRUE	unknown	10
77	TRUE	Empty	ADP-ribosylation factor 1 OS=Chlamydomonas reinhardtii OX=3055 GN=ARF1 PE=2 SV=2	ARF1_CHLRE (+2)	ARF1	21 kDa	TRUE	unknown	8
78	TRUE	Empty	Xylanase inhibitor protein 1 OS=Triticum aestivum OX=4565 GN=XIPI PE=1 SV=2	XIP1_WHEAT	XIPI	33 kDa		unknown	11
79	TRUE	Empty	Chaperone protein ClpC1, chloroplastic OS=Oryza sativa subsp. japonica OX=39947 GN=CLPC1 PE=2 SV=2	CLPC1_ORYSJ	CLPC1	102 kDa	TRUE	unknown	14
80	TRUE	Empty	Coatomer subunit alpha-1 OS=Oryza sativa subsp. japonica OX=39947 GN=Os03g0711400 PE=2 SV=1	COPA1_ORYSJ	Os03g0711400	136 kDa	TRUE	unknown	14
81	TRUE	Empty	Probable UDP-arabinopyranose mutase 1 OS=Zea mays OX=4577 GN=UPTG PE=1 SV=2	RGP1_MAIZE	UPTG	41 kDa	TRUE	unknown	12
82	TRUE	Empty	Serpin-Z1C OS=Triticum aestivum OX=4565 PE=1 SV=1	SPZ1C_WHEAT		43 kDa	TRUE	unknown	9
83	TRUE	Empty	Translationally-controlled tumor protein homolog OS=Triticum aestivum OX=4565 GN=TCTP PE=2 SV=1	TCTP_WHEAT	TCTP	19 kDa		unknown	10
84	TRUE	Empty	Elongation factor 1-alpha OS=Hordeum vulgare OX=4513 GN=BLT63 PE=1 SV=1	EF1A2_HORVU	BLT63	49 kDa	TRUE	unknown	6
85	TRUE	Empty	Ubiquitin-activating enzyme E1 1 OS=Triticum aestivum OX=4565 GN=UBA1 PE=1 SV=1	UBE11_WHEAT	UBA1	117 kDa		unknown	13
86	TRUE	Empty	Chaperonin CPN60-1, mitochondrial OS=Zea mays OX=4577 GN=CPN60I PE=1 SV=2	CH61_MAIZE	CPN60I	61 kDa	TRUE	unknown	12
87	TRUE	Empty	Glutenin, high molecular weight subunit 12 OS=Triticum aestivum OX=4565 PE=3 SV=1	GLT3_WHEAT		71 kDa	TRUE	unknown	4
88	TRUE	Empty	Puroindoline-B OS=Triticum aestivum OX=4565 GN=PINB PE=1 SV=1	PUIB_WHEAT	PINB	17 kDa		unknown	8
89	TRUE	Empty	2-Cys peroxiredoxin BAS1, chloroplastic (Fragment) OS=Hordeum vulgare OX=4513 GN=BAS1 PE=2 SV=1	BAS1_HORVU (+1)	BAS1	23 kDa	TRUE	unknown	9
90	TRUE	Empty	Xylose isomerase OS=Hordeum vulgare OX=4513 GN=XYLA PE=1 SV=1	XYLA_HORVU	XYLA	54 kDa		unknown	11
91	TRUE	Empty	Avenin-like a2 OS=Triticum aestivum OX=4565 PE=2 SV=1	AVLA2_WHEAT (+1)		20 kDa	TRUE	unknown	2
92	TRUE	Empty	Chymotrypsin inhibitor WCI OS=Triticum aestivum OX=4565 PE=1 SV=1	ICIW2_WHEAT		13 kDa		unknown	2
93	TRUE	Empty	Ketol-acid reductoisomerase, chloroplastic OS=Oryza sativa subsp. japonica OX=39947 GN=Os05g0573700 PE=1 SV=1	ILV5_ORYSJ	Os05g0573700	62 kDa	TRUE	unknown	7
94	TRUE	Empty	Trypsin OS=Sus scrofa OX=9823 PE=1 SV=1	TRYP_PIG		24 kDa		unknown	5
95	TRUE	Empty	Alpha/beta-gliadin clone PW1215 OS=Triticum aestivum OX=4565 PE=3 SV=1	GDA6_WHEAT		34 kDa	TRUE	unknown	12
96	TRUE	Empty	DEAD-box ATP-dependent RNA helicase 37 OS=Oryza sativa subsp. japonica OX=39947 GN=PL10A PE=2 SV=1	RH37_ORYSJ	PL10A	68 kDa	TRUE	unknown	9
97	TRUE	Empty	Probable LL-diaminopimelate aminotransferase, chloroplastic OS=Oryza sativa subsp. japonica OX=39947 GN=AGD2 PE=2 SV=1	DAPAT_ORYSJ	AGD2	50 kDa	TRUE	unknown	11
98	TRUE	Empty	Histone H4 variant TH011 OS=Triticum aestivum OX=4565 PE=3 SV=2	H41_WHEAT (+11)		11 kDa		unknown	9
99	TRUE	Empty	Creatine kinase M-type OS=Mus musculus OX=10090 GN=Ckm PE=1 SV=1	KCRM_MOUSE (+1)	Ckm	43 kDa		unknown	10
100	TRUE	Empty	60S ribosomal protein L8-1 OS=Arabidopsis thaliana OX=3702 GN=RPL8A PE=1 SV=2	RL81_ARATH (+1)	RPL8A	28 kDa		unknown	7
101	TRUE	Empty	60S ribosomal protein L10 OS=Euphorbia esula OX=3993 GN=RPL10 PE=2 SV=1	RL10_EUPES	RPL10	25 kDa	TRUE	unknown	7
102	TRUE	Empty	RuBisCO large subunit-binding protein subunit beta, chloroplastic (Fragment) OS=Secale cereale OX=4550 GN=CPN60 PE=2 SV=1	RUBB_SECCE	CPN60	53 kDa	TRUE	unknown	12
103	TRUE	Empty	Purothionin A-1 OS=Triticum aestivum OX=4565 GN=THI1.3 PE=1 SV=2	THNB_WHEAT	THI1	15 kDa	TRUE	unknown	6
104	TRUE	Empty	14-3-3-like protein B OS=Hordeum vulgare OX=4513 PE=2 SV=1	1433B_HORVU		30 kDa	TRUE	unknown	9
105	TRUE	Empty	Ricin B-like lectin R40G2 OS=Oryza sativa subsp. japonica OX=39947 GN=R40G2 PE=2 SV=1	40G2_ORYSJ	R40G2	39 kDa	TRUE	unknown	7
106	TRUE	Empty	16.9 kDa class I heat shock protein 1 OS=Triticum aestivum OX=4565 GN=hsp16.9A PE=2 SV=1	HS16A_WHEAT	hsp16	17 kDa	TRUE	unknown	6
107	TRUE	Empty	Heat shock protein 83 OS=Ipomoea nil OX=35883 GN=HSP83A PE=2 SV=1	HSP83_IPONI	HSP83A	81 kDa	TRUE	unknown	9
108	TRUE	Empty	Keratin, type I cytoskeletal 14 OS=Homo sapiens OX=9606 GN=KRT14 PE=1 SV=4	K1C14_HUMAN	KRT14	52 kDa	TRUE	unknown	9
109	TRUE	Empty	Pyruvate kinase 1, cytosolic OS=Oryza sativa subsp. indica OX=39946 GN=OsI_35105 PE=3 SV=1	KPYC1_ORYSI (+1)	OsI_35105	57 kDa		unknown	9
110	TRUE	Empty	Lactoylglutathione lyase OS=Oryza sativa subsp. japonica OX=39947 GN=GLYI-11 PE=1 SV=2	LGUL_ORYSJ	GLYI-11	33 kDa		unknown	6
111	TRUE	Empty	Alpha-glucan phosphorylase 1 OS=Arabidopsis thaliana OX=3702 GN=PHS1 PE=1 SV=1	PHS1_ARATH	PHS1	109 kDa	TRUE	unknown	6
112	TRUE	Empty	40S ribosomal protein S5 (Fragment) OS=Cicer arietinum OX=3827 GN=RPS5 PE=2 SV=1	RS5_CICAR	RPS5	22 kDa		unknown	7
113	TRUE	Empty	Tripeptidyl-peptidase 2 OS=Oryza sativa subsp. japonica OX=39947 GN=TPP2 PE=2 SV=1	TPPII_ORYSJ	TPP2	149 kDa		unknown	8
114	TRUE	Empty	Alpha/beta-gliadin MM1 OS=Triticum aestivum OX=4565 PE=1 SV=1	GDA9_WHEAT		35 kDa	TRUE	unknown	7
115	TRUE	Empty	Keratin, type II cytoskeletal 5 OS=Homo sapiens OX=9606 GN=KRT5 PE=1 SV=3	K2C5_HUMAN (+1)	KRT5	62 kDa	TRUE	unknown	10
116	TRUE	Empty	40S ribosomal protein S15a-1 OS=Arabidopsis thaliana OX=3702 GN=RPS15AA PE=2 SV=2	R15A1_ARATH (+1)	RPS15AA	15 kDa	TRUE	unknown	6
117	TRUE	Empty	1-Cys peroxiredoxin PER1 OS=Triticum aestivum OX=4565 GN=PER1 PE=2 SV=1	REHY_WHEAT	PER1	24 kDa		unknown	9
118	TRUE	Empty	Sucrose synthase 1 OS=Oryza sativa subsp. japonica OX=39947 GN=SUS1 PE=1 SV=1	SUS1_ORYSJ	SUS1	93 kDa	TRUE	unknown	9
119	TRUE	Empty	Betaine aldehyde dehydrogenase 2 OS=Oryza sativa subsp. indica OX=39946 GN=BADH2 PE=2 SV=1	BADH2_ORYSI (+1)	BADH2	55 kDa		unknown	6
120	TRUE	Empty	Coatomer subunit beta'-1 OS=Oryza sativa subsp. japonica OX=39947 GN=Os06g0143900 PE=2 SV=1	COB21_ORYSJ	Os06g0143900	103 kDa	TRUE	unknown	7
121	TRUE	Empty	Peptidyl-prolyl cis-trans isomerase OS=Zea mays OX=4577 GN=CYP PE=2 SV=1	CYPH_MAIZE	CYP	18 kDa		unknown	3
122	TRUE	Empty	1,4-alpha-glucan-branching enzyme 2, chloroplastic/amyloplastic OS=Zea mays OX=4577 GN=SBE1 PE=1 SV=1	GLGB_MAIZE	SBE1	91 kDa	TRUE	unknown	7
123	TRUE	Empty	Importin subunit alpha-1a OS=Oryza sativa subsp. japonica OX=39947 GN=Os01g0253300 PE=1 SV=2	IMA1A_ORYSJ	Os01g0253300	58 kDa	TRUE	unknown	8
124	TRUE	Empty	26S proteasome regulatory subunit 7A OS=Oryza sativa subsp. japonica OX=39947 GN=RPT1A PE=2 SV=1	PRS7A_ORYSJ (+1)	RPT1A	48 kDa	TRUE	unknown	9
125	TRUE	Empty	40S ribosomal protein S3-3 OS=Arabidopsis thaliana OX=3702 GN=RPS3C PE=1 SV=1	RS33_ARATH	RPS3C	27 kDa		unknown	8
126	TRUE	Empty	40S ribosomal protein S4 OS=Gossypium hirsutum OX=3635 GN=RPS4 PE=2 SV=1	RS4_GOSHI (+1)	RPS4	30 kDa		unknown	7
127	TRUE	Empty	UDP-glucuronic acid decarboxylase 2 OS=Arabidopsis thaliana OX=3702 GN=UXS2 PE=1 SV=1	UXS2_ARATH (+1)	UXS2	50 kDa	TRUE	unknown	8
128	TRUE	Empty	Glutelin type-B 4 OS=Oryza sativa subsp. japonica OX=39947 GN=GLUB4 PE=1 SV=1	GLUB4_ORYSJ	GLUB4	57 kDa	TRUE	unknown	2
129	TRUE	Empty	Serine carboxypeptidase 2 OS=Triticum aestivum OX=4565 GN=CBP2 PE=1 SV=2	CBP2_WHEAT	CBP2	50 kDa	TRUE	unknown	9
130	TRUE	Empty	Cytosolic isocitrate dehydrogenase [NADP] OS=Arabidopsis thaliana OX=3702 GN=CICDH PE=1 SV=1	ICDHC_ARATH	CICDH	46 kDa	TRUE	unknown	7
131	TRUE	Empty	60S ribosomal protein L7a-1 OS=Oryza sativa subsp. japonica OX=39947 GN=RPL7A-1 PE=2 SV=1	RL7A1_ORYSJ (+1)	RPL7A-1	29 kDa		unknown	7
132	TRUE	Empty	40S ribosomal protein S3a OS=Oryza sativa subsp. japonica OX=39947 GN=RPS3A PE=2 SV=2	RS3A_ORYSJ	RPS3A	30 kDa	TRUE	unknown	7
133	TRUE	Empty	60S ribosomal protein L13a OS=Picea mariana OX=3335 GN=RPL13A PE=2 SV=1	RL13A_PICMA	RPL13A	24 kDa		unknown	5
134	TRUE	Empty	Elongation factor 2 OS=Beta vulgaris OX=161934 PE=2 SV=1	EF2_BETVU		94 kDa	TRUE	unknown	6
135	TRUE	Empty	Succinate--CoA ligase [ADP-forming] subunit beta, mitochondrial OS=Oryza sativa subsp. japonica OX=39947 GN=Os02g0621700 PE=1 SV=1	SUCB_ORYSJ	Os02g0621700	45 kDa		unknown	6
136	TRUE	Empty	12S seed storage globulin 1 OS=Avena sativa OX=4498 PE=2 SV=1	SSG1_AVESA		59 kDa	TRUE	unknown	4
137	TRUE	Empty	Heat shock cognate 70 kDa protein 2 OS=Solanum lycopersicum OX=4081 GN=HSC-2 PE=2 SV=1	HSP72_SOLLC	HSC-2	71 kDa	TRUE	unknown	4
138	TRUE	Empty	2,3-bisphosphoglycerate-independent phosphoglycerate mutase OS=Zea mays OX=4577 PE=1 SV=1	PMGI_MAIZE		61 kDa	TRUE	unknown	7
139	TRUE	Empty	26S proteasome regulatory subunit 4 homolog OS=Oryza sativa subsp. japonica OX=39947 GN=TBP2 PE=2 SV=2	PRS4_ORYSJ	TBP2	50 kDa		unknown	7
140	TRUE	Empty	60S ribosomal protein L23 OS=Arabidopsis thaliana OX=3702 GN=RPL23A PE=2 SV=3	RL23_ARATH	RPL23A	15 kDa	TRUE	unknown	6
141	TRUE	Empty	40S ribosomal protein Sa-1 OS=Arabidopsis thaliana OX=3702 GN=RPSaA PE=1 SV=3	RSSA1_ARATH (+1)	RPSaA	32 kDa	TRUE	unknown	4
142	TRUE	Empty	UDP-glucose 6-dehydrogenase 3 OS=Oryza sativa subsp. japonica OX=39947 GN=UGD3 PE=2 SV=1	UGDH3_ORYSJ	UGD3	53 kDa	TRUE	unknown	8
143	TRUE	Empty	40S ribosomal protein S11 OS=Zea mays OX=4577 GN=RPS11 PE=2 SV=1	RS11_MAIZE	RPS11	18 kDa	TRUE	unknown	6
144	TRUE	Empty	40S ribosomal protein S16 OS=Oryza sativa subsp. indica OX=39946 GN=RPS16A PE=2 SV=1	RS16_ORYSI (+1)	RPS16A	17 kDa		unknown	5
145	TRUE	Empty	Actin-1 OS=Oryza sativa subsp. indica OX=39946 GN=ACT1 PE=2 SV=1	ACT1_ORYSI (+1)	ACT1	42 kDa	TRUE	unknown	5
146	TRUE	Empty	ADP,ATP carrier protein 1, mitochondrial OS=Triticum aestivum OX=4565 GN=ANT-G1 PE=3 SV=1	ADT1_WHEAT	ANT-G1	36 kDa		unknown	6
147	TRUE	Empty	Adenine nucleotide transporter BT1, chloroplastic/amyloplastic/mitochondrial OS=Zea mays OX=4577 GN=BT1 PE=1 SV=1	BT1_MAIZE	BT1	47 kDa		unknown	7
148	TRUE	Empty	Calreticulin OS=Zea mays OX=4577 GN=CRT PE=2 SV=1	CALR_MAIZE	CRT	48 kDa		unknown	6
149	TRUE	Empty	Basic endochitinase A OS=Secale cereale OX=4550 GN=rsca PE=1 SV=1	CHIA_SECCE	rsca	34 kDa	TRUE	unknown	6
150	TRUE	Empty	Chaperone protein ClpB2, chloroplastic OS=Oryza sativa subsp. japonica OX=39947 GN=CLPB2 PE=2 SV=1	CLPB2_ORYSJ	CLPB2	109 kDa	TRUE	unknown	9
151	TRUE	Empty	Hornerin OS=Homo sapiens OX=9606 GN=HRNR PE=1 SV=2	HORN_HUMAN	HRNR	282 kDa		unknown	8
152	TRUE	Empty	Ubiquitin-40S ribosomal protein S27a-1 OS=Oryza sativa subsp. japonica OX=39947 GN=RPS27AA PE=2 SV=1	R27AA_ORYSJ (+2)	RPS27AA	18 kDa	TRUE	unknown	6
153	TRUE	Empty	Ras-related protein Rab-2-B OS=Zea mays OX=4577 GN=RAB2B PE=2 SV=1	RAB2B_MAIZE	RAB2B	23 kDa		unknown	7
154	TRUE	Empty	RuBisCO large subunit-binding protein subunit alpha, chloroplastic (Fragment) OS=Triticum aestivum OX=4565 PE=1 SV=1	RUBA_WHEAT		58 kDa		unknown	9
155	TRUE	Empty	Fructokinase-1 OS=Oryza sativa subsp. japonica OX=39947 GN=FRK1 PE=1 SV=2	SCRK1_ORYSJ	FRK1	35 kDa	TRUE	unknown	7
156	TRUE	Empty	Trypsin/alpha-amylase inhibitor CMX1/CMX3 OS=Triticum aestivum OX=4565 PE=2 SV=1	IACX1_WHEAT (+1)		14 kDa		unknown	3
157	TRUE	Empty	Beta-amylase (Fragment) OS=Secale cereale OX=4550 GN=BMY1 PE=2 SV=1	AMYB_SECCE	BMY1	24 kDa	TRUE	unknown	2
158	TRUE	Empty	L-ascorbate peroxidase 2, cytosolic OS=Oryza sativa subsp. japonica OX=39947 GN=APX2 PE=1 SV=1	APX2_ORYSJ	APX2	27 kDa	TRUE	unknown	5
159	TRUE	Empty	Sarcoplasmic/endoplasmic reticulum calcium ATPase 1 OS=Mus musculus OX=10090 GN=Atp2a1 PE=1 SV=1	AT2A1_MOUSE	Atp2a1	109 kDa		unknown	7
160	TRUE	Empty	Glutamate-1-semialdehyde 2,1-aminomutase, chloroplastic OS=Hordeum vulgare OX=4513 GN=GSA PE=1 SV=3	GSA_HORVU	GSA	49 kDa	TRUE	unknown	7
161	TRUE	Empty	Histone H2B.2 OS=Zea mays OX=4577 PE=2 SV=3	H2B2_MAIZE (+6)		16 kDa	TRUE	unknown	6
162	TRUE	Empty	Heat shock 70 kDa protein OS=Zea mays OX=4577 GN=HSP70 PE=3 SV=2	HSP70_MAIZE	HSP70	71 kDa	TRUE	unknown	4
163	TRUE	Empty	Bowman-Birk type trypsin inhibitor OS=Triticum aestivum OX=4565 PE=1 SV=1	IBB3_WHEAT		8 kDa		unknown	4
164	TRUE	Empty	Parvalbumin alpha OS=Mus musculus OX=10090 GN=Pvalb PE=1 SV=3	PRVA_MOUSE	Pvalb	12 kDa		unknown	7
165	TRUE	Empty	Ras-related protein RABA1h OS=Arabidopsis thaliana OX=3702 GN=RABA1H PE=2 SV=1	RAA1H_ARATH (+1)	RABA1H	24 kDa	TRUE	unknown	5
166	TRUE	Empty	Ras-related protein Rab7 OS=Cenchrus ciliaris OX=35872 PE=2 SV=1	RAB7_CENCI		23 kDa	TRUE	unknown	7
167	TRUE	Empty	DEAD-box ATP-dependent RNA helicase 15 OS=Oryza sativa subsp. japonica OX=39947 GN=AIP2 PE=1 SV=1	RH15_ORYSJ (+1)	AIP2	49 kDa	TRUE	unknown	7
168	TRUE	Empty	60S ribosomal protein L17-2 OS=Hordeum vulgare OX=4513 PE=2 SV=1	RL172_HORVU		20 kDa	TRUE	unknown	7
169	TRUE	Empty	60S ribosomal protein L18a OS=Castanea sativa OX=21020 GN=RPL18A PE=2 SV=1	RL18A_CASSA (+1)	RPL18A	21 kDa		unknown	4
170	TRUE	Empty	Succinate dehydrogenase [ubiquinone] flavoprotein subunit 1, mitochondrial OS=Arabidopsis thaliana OX=3702 GN=SDH1-1 PE=1 SV=1	SDHA1_ARATH	SDH1-1	70 kDa		unknown	6
171	TRUE	Empty	Leucine aminopeptidase 2, chloroplastic OS=Oryza sativa subsp. japonica OX=39947 GN=Os02g0794700 PE=2 SV=1	AMPL2_ORYSJ	Os02g0794700	62 kDa		unknown	7
172	TRUE	Empty	Elongation factor 1-gamma 3 OS=Oryza sativa subsp. japonica OX=39947 GN=Os06g0571400 PE=2 SV=1	EF1G3_ORYSJ	Os06g0571400	47 kDa		unknown	4
173	TRUE	Empty	Guanine nucleotide-binding protein subunit beta-like protein A OS=Oryza sativa subsp. japonica OX=39947 GN=RACK1A PE=1 SV=1	GBLPA_ORYSJ	RACK1A	36 kDa		unknown	6
174	TRUE	Empty	Alpha-amylase inhibitor 0.53 OS=Triticum aestivum OX=4565 PE=1 SV=1	IAA5_WHEAT		13 kDa	TRUE	unknown	4
175	TRUE	Empty	Delta-1-pyrroline-5-carboxylate synthase 1 OS=Oryza sativa subsp. japonica OX=39947 GN=P5CS1 PE=2 SV=2	P5CS1_ORYSJ	P5CS1	78 kDa	TRUE	unknown	8
176	TRUE	Empty	Pyruvate, phosphate dikinase 2 OS=Zea mays OX=4577 GN=PPDK2 PE=1 SV=2	PPDK2_MAIZE	PPDK2	96 kDa	TRUE	unknown	7
177	TRUE	Empty	26S proteasome non-ATPase regulatory subunit 3 homolog A OS=Arabidopsis thaliana OX=3702 GN=RPN3A PE=1 SV=3	PSD3A_ARATH (+1)	RPN3A	56 kDa		unknown	6
178	TRUE	Empty	60S acidic ribosomal protein P0 OS=Oryza sativa subsp. japonica OX=39947 GN=Os08g0130500 PE=1 SV=3	RLA0_ORYSJ	Os08g0130500	34 kDa		unknown	4
179	TRUE	Empty	40S ribosomal protein S13 OS=Zea mays OX=4577 GN=RPS13 PE=2 SV=1	RS13_MAIZE	RPS13	17 kDa		unknown	6
180	TRUE	Empty	Fructokinase-2 OS=Oryza sativa subsp. indica OX=39946 GN=FRK2 PE=1 SV=2	SCRK2_ORYSI (+1)	FRK2	36 kDa		unknown	6
181	TRUE	Empty	V-type proton ATPase catalytic subunit A (Fragment) OS=Hordeum vulgare OX=4513 PE=2 SV=1	VATA_HORVU		64 kDa	TRUE	unknown	6
182	TRUE	Empty	Wheatwin-2 OS=Triticum aestivum OX=4565 GN=PR4B PE=1 SV=1	WHW2_WHEAT	PR4B	16 kDa	TRUE	unknown	5
183	TRUE	Empty	Malate dehydrogenase, cytoplasmic OS=Oryza sativa subsp. japonica OX=39947 GN=Os10g0478200 PE=1 SV=3	MDHC_ORYSJ	Os10g0478200	36 kDa	TRUE	unknown	4
184	TRUE	Empty	Alpha/beta-gliadin clone PW8142 OS=Triticum aestivum OX=4565 PE=3 SV=1	GDA7_WHEAT		36 kDa	TRUE	unknown	4
185	TRUE	Empty	Beta-amylase OS=Triticum aestivum OX=4565 GN=BMY1 PE=1 SV=1	AMYB_WHEAT	BMY1	57 kDa	TRUE	unknown	6
186	TRUE	Empty	Phytepsin OS=Hordeum vulgare OX=4513 PE=1 SV=1	ASPR_HORVU		54 kDa		unknown	6
187	TRUE	Empty	Cysteine synthase OS=Triticum aestivum OX=4565 GN=CYS1 PE=2 SV=1	CYSK_WHEAT	CYS1	34 kDa		unknown	5
188	TRUE	Empty	Formate dehydrogenase 1, mitochondrial OS=Oryza sativa subsp. japonica OX=39947 GN=Os06g0486800 PE=1 SV=2	FDH1_ORYSJ	Os06g0486800	41 kDa	TRUE	unknown	4
189	TRUE	Empty	Glutamate--glyoxylate aminotransferase 2 OS=Arabidopsis thaliana OX=3702 GN=GGAT2 PE=1 SV=1	GGT2_ARATH	GGAT2	53 kDa		unknown	5
190	TRUE	Empty	Serine hydroxymethyltransferase 4 OS=Arabidopsis thaliana OX=3702 GN=SHM4 PE=1 SV=1	GLYC4_ARATH	SHM4	52 kDa	TRUE	unknown	5
191	TRUE	Empty	Eukaryotic translation initiation factor isoform 4G-1 OS=Triticum aestivum OX=4565 PE=1 SV=2	IF4G1_WHEAT		86 kDa		unknown	8
192	TRUE	Empty	Pyrophosphate--fructose 6-phosphate 1-phosphotransferase subunit beta 1 OS=Arabidopsis thaliana OX=3702 GN=PFP-BETA1 PE=1 SV=1	PFPB1_ARATH (+2)	PFP-BETA1	61 kDa		unknown	4
193	TRUE	Empty	26S proteasome regulatory subunit 6B homolog OS=Helianthus annuus OX=4232 PE=1 SV=1	PRS6B_HELAN		47 kDa	TRUE	unknown	5
194	TRUE	Empty	Adenylosuccinate synthetase, chloroplastic (Fragment) OS=Triticum aestivum OX=4565 PE=1 SV=1	PURA_WHEAT		51 kDa	TRUE	unknown	6
195	TRUE	Empty	Protein synthesis inhibitor I OS=Hordeum vulgare OX=4513 GN=RIP30 PE=1 SV=2	RIP1_HORVU (+1)	RIP30	30 kDa		unknown	5
196	TRUE	Empty	60S ribosomal protein L11 OS=Oryza sativa subsp. indica OX=39946 GN=RPL11 PE=2 SV=2	RL11_ORYSI (+1)	RPL11	21 kDa		unknown	5
197	TRUE	Empty	60S ribosomal protein L5-2 OS=Oryza sativa subsp. japonica OX=39947 GN=RPL5B PE=2 SV=2	RL52_ORYSJ	RPL5B	35 kDa		unknown	5
198	TRUE	Empty	Heat shock 70 kDa protein 14 OS=Arabidopsis thaliana OX=3702 GN=HSP70-14 PE=1 SV=1	HSP7O_ARATH (+1)	HSP70-14	92 kDa		unknown	5
199	TRUE	Empty	Profilin-1 OS=Hordeum vulgare OX=4513 GN=PRO1 PE=2 SV=1	PROF1_HORVU	PRO1	14 kDa	TRUE	unknown	4
200	TRUE	Empty	40S ribosomal protein S6-1 OS=Arabidopsis thaliana OX=3702 GN=RPS6A PE=1 SV=2	RS61_ARATH (+1)	RPS6A	28 kDa		unknown	3
201	TRUE	Empty	T-complex protein 1 subunit eta OS=Arabidopsis thaliana OX=3702 GN=CCT7 PE=1 SV=1	TCPH_ARATH	CCT7	60 kDa		unknown	8
202	TRUE	Empty	Pyruvate kinase, cytosolic isozyme OS=Glycine max OX=3847 PE=2 SV=1	KPYC_SOYBN		55 kDa		unknown	3
203	TRUE	Empty	17.0 kDa class II heat shock protein OS=Zea mays OX=4577 GN=HSP18 PE=2 SV=1	HSP23_MAIZE	HSP18	17 kDa	TRUE	unknown	4
204	TRUE	Empty	Aldose reductase OS=Hordeum vulgare OX=4513 PE=1 SV=1	ALDR_HORVU		36 kDa		unknown	6
205	TRUE	Empty	Avenin-like b4 OS=Triticum aestivum OX=4565 PE=3 SV=1	AVLB4_WHEAT (+1)		33 kDa	TRUE	unknown	2
206	TRUE	Empty	Calnexin homolog OS=Helianthus tuberosus OX=4233 PE=2 SV=1	CALX_HELTU (+2)		61 kDa		unknown	2
207	TRUE	Empty	40S ribosomal protein S9-2 OS=Arabidopsis thaliana OX=3702 GN=RPS9C PE=1 SV=1	RS92_ARATH	RPS9C	23 kDa		unknown	5
208	TRUE	Empty	Pyrophosphate-energized vacuolar membrane proton pump OS=Hordeum vulgare OX=4513 PE=2 SV=2	AVP_HORVU		80 kDa		unknown	5
209	TRUE	Empty	Probable glutathione S-transferase DHAR1, cytosolic OS=Oryza sativa subsp. japonica OX=39947 GN=DHAR1 PE=1 SV=1	DHAR1_ORYSJ	DHAR1	24 kDa		unknown	4
210	TRUE	Empty	Glutamate dehydrogenase 2, mitochondrial OS=Oryza sativa subsp. indica OX=39946 GN=GDH2 PE=3 SV=1	DHE2_ORYSI (+1)	GDH2	45 kDa	TRUE	unknown	5
211	TRUE	Empty	Soluble inorganic pyrophosphatase OS=Zea mays OX=4577 GN=IPP PE=2 SV=1	IPYR_MAIZE	IPP	24 kDa	TRUE	unknown	4
212	TRUE	Empty	5-methyltetrahydropteroyltriglutamate--homocysteine methyltransferase 1 OS=Oryza sativa subsp. japonica OX=39947 GN=Os12g0623900 PE=2 SV=1	METE1_ORYSJ	Os12g0623900	85 kDa	TRUE	unknown	5
213	TRUE	Empty	Non-specific lipid-transfer protein 2G OS=Triticum aestivum OX=4565 PE=1 SV=2	NLT2G_WHEAT		10 kDa		unknown	4
214	TRUE	Empty	Ras-related protein RIC1 OS=Oryza sativa subsp. japonica OX=39947 GN=RIC1 PE=2 SV=2	RIC1_ORYSJ	RIC1	22 kDa	TRUE	unknown	5
215	TRUE	Empty	60S ribosomal protein L4 OS=Prunus armeniaca OX=36596 GN=RPL4 PE=2 SV=1	RL4_PRUAR	RPL4	45 kDa		unknown	3
216	TRUE	Empty	40S ribosomal protein S23-2 OS=Arabidopsis thaliana OX=3702 GN=RPS23B PE=2 SV=2	RS232_ARATH (+2)	RPS23B	16 kDa		unknown	5
217	TRUE	Empty	Sucrose synthase 3 OS=Oryza sativa subsp. japonica OX=39947 GN=SUS3 PE=1 SV=2	SUS3_ORYSJ	SUS3	93 kDa	TRUE	unknown	5
218	TRUE	Empty	T-complex protein 1 subunit beta OS=Arabidopsis thaliana OX=3702 GN=CCT2 PE=1 SV=1	TCPB_ARATH	CCT2	57 kDa		unknown	5
219	TRUE	Empty	Transketolase, chloroplastic OS=Zea mays OX=4577 PE=1 SV=1	TKTC_MAIZE		73 kDa	TRUE	unknown	5
220	TRUE	Empty	Alpha,alpha-trehalose-phosphate synthase [UDP-forming] 5 OS=Arabidopsis thaliana OX=3702 GN=TPS5 PE=1 SV=2	TPS5_ARATH	TPS5	97 kDa	TRUE	unknown	6
221	TRUE	Empty	Eukaryotic translation initiation factor 5A-1/2 OS=Solanum tuberosum OX=4113 GN=EIF5A1 PE=2 SV=1	IF5A1_SOLTU (+5)	EIF5A1	17 kDa		unknown	3
222	TRUE	Empty	60S ribosomal protein L10a-2 OS=Arabidopsis thaliana OX=3702 GN=RPL10AB PE=1 SV=1	R10A2_ARATH	RPL10AB	24 kDa	TRUE	unknown	5
223	TRUE	Empty	Alpha-amylase/trypsin inhibitor CM2 OS=Triticum aestivum OX=4565 PE=1 SV=2	IAAC2_WHEAT		15 kDa	TRUE	unknown	5
224	TRUE	Empty	17.6 kDa class I heat shock protein OS=Solanum peruvianum OX=4082 PE=2 SV=1	HSP12_SOLPE		18 kDa	TRUE	unknown	3
225	TRUE	Empty	Aspartate aminotransferase, mitochondrial OS=Arabidopsis thaliana OX=3702 GN=ASP1 PE=1 SV=1	AAT1_ARATH	ASP1	48 kDa		unknown	2
226	TRUE	Empty	Fructose-bisphosphate aldolase A OS=Mus musculus OX=10090 GN=Aldoa PE=1 SV=2	ALDOA_MOUSE (+1)	Aldoa	39 kDa		unknown	5
227	TRUE	Empty	Carbamoyl-phosphate synthase large chain, chloroplastic OS=Oryza sativa subsp. japonica OX=39947 GN=CARB PE=2 SV=1	CARB_ORYSJ	CARB	128 kDa		unknown	6
228	TRUE	Empty	Basic endochitinase C OS=Secale cereale OX=4550 GN=rscc PE=1 SV=1	CHIC_SECCE	rscc	28 kDa	TRUE	unknown	3
229	TRUE	Empty	Coatomer subunit gamma-2 OS=Oryza sativa subsp. japonica OX=39947 GN=Os07g0201100 PE=2 SV=1	COPG2_ORYSJ	Os07g0201100	99 kDa	TRUE	unknown	6
230	TRUE	Empty	Obg-like ATPase 1 OS=Arabidopsis thaliana OX=3702 GN=YchF1 PE=1 SV=1	OLA1_ARATH	YchF1	44 kDa		unknown	4
231	TRUE	Empty	Protein disulfide-isomerase OS=Hordeum vulgare OX=4513 GN=PDI PE=1 SV=2	PDI_HORVU	PDI	56 kDa	TRUE	unknown	4
232	TRUE	Empty	60S ribosomal protein L7-4 OS=Arabidopsis thaliana OX=3702 GN=RPL7D PE=2 SV=1	RL74_ARATH	RPL7D	28 kDa		unknown	4
233	TRUE	Empty	60S ribosomal protein L9 OS=Oryza sativa subsp. japonica OX=39947 GN=RPL9 PE=2 SV=3	RL9_ORYSJ	RPL9	21 kDa		unknown	5
234	TRUE	Empty	Probable methionine--tRNA ligase OS=Oryza sativa subsp. japonica OX=39947 GN=Os06g0508700 PE=2 SV=2	SYM_ORYSJ	Os06g0508700	89 kDa	TRUE	unknown	6
235	TRUE	Empty	Protein TOC75, chloroplastic OS=Oryza sativa subsp. japonica OX=39947 GN=TOC75 PE=2 SV=2	TOC75_ORYSJ	TOC75	88 kDa		unknown	7
236	TRUE	Empty	40S ribosomal protein S7 OS=Hordeum vulgare OX=4513 GN=RPS7 PE=2 SV=1	RS7_HORVU	RPS7	22 kDa	TRUE	unknown	4
237	TRUE	Empty	Aldehyde dehydrogenase family 7 member A1 OS=Brassica napus OX=3708 GN=BTG-26 PE=1 SV=3	AL7A1_BRANA (+1)	BTG-26	53 kDa		unknown	4
238	TRUE	Empty	Proteasome subunit alpha type-6 OS=Oryza sativa subsp. japonica OX=39947 GN=PAA1 PE=2 SV=1	PSA6_ORYSJ	PAA1	28 kDa		unknown	5
239	TRUE	Empty	60S ribosomal protein L23a OS=Daucus carota OX=4039 GN=RPL23A PE=2 SV=1	RL23A_DAUCA	RPL23A	18 kDa	TRUE	unknown	3
240	TRUE	Empty	Alcohol dehydrogenase 3 OS=Hordeum vulgare OX=4513 GN=ADH3 PE=3 SV=1	ADH3_HORVU	ADH3	41 kDa	TRUE	unknown	5
241	TRUE	Empty	Aspartate aminotransferase, cytoplasmic OS=Daucus carota OX=4039 PE=2 SV=1	AATC_DAUCA		44 kDa	TRUE	unknown	3
242	TRUE	Empty	Probable glucuronosyltransferase Os01g0926700 OS=Oryza sativa subsp. japonica OX=39947 GN=Os01g0926700 PE=3 SV=1	GT15_ORYSJ (+1)	Os01g0926700	47 kDa		unknown	6
243	TRUE	Empty	Alanine aminotransferase 2 OS=Panicum miliaceum OX=4540 PE=1 SV=1	ALA2_PANMI		53 kDa	TRUE	unknown	2
244	TRUE	Empty	Beta-glucosidase 26 OS=Oryza sativa subsp. japonica OX=39947 GN=BGLU26 PE=1 SV=1	BGL26_ORYSJ	BGLU26	59 kDa	TRUE	unknown	3
245	TRUE	Empty	Glutenin, low molecular weight subunit PTDUCD1 OS=Triticum aestivum OX=4565 PE=2 SV=1	GLTC_WHEAT		33 kDa		unknown	3
246	TRUE	Empty	Sucrose synthase 2 OS=Oryza sativa subsp. japonica OX=39947 GN=SUS2 PE=1 SV=2	SUS2_ORYSJ	SUS2	92 kDa	TRUE	unknown	2
247	TRUE	Empty	Adenine phosphoribosyltransferase 1 OS=Triticum aestivum OX=4565 GN=APT1 PE=2 SV=1	APT1_WHEAT	APT1	20 kDa		unknown	4
248	TRUE	Empty	Homocysteine S-methyltransferase 3 OS=Zea mays OX=4577 GN=HMT-3 PE=2 SV=1	HMT3_MAIZE	HMT-3	37 kDa		unknown	5
249	TRUE	Empty	Proteasome subunit alpha type-5 OS=Oryza sativa subsp. japonica OX=39947 GN=PAE1 PE=2 SV=1	PSA5_ORYSJ	PAE1	26 kDa	TRUE	unknown	5
250	TRUE	Empty	60S ribosomal protein L6 OS=Mesembryanthemum crystallinum OX=3544 GN=RPL6 PE=2 SV=1	RL6_MESCR	RPL6	26 kDa		unknown	3
251	TRUE	Empty	Adenosylhomocysteinase OS=Phalaenopsis sp. OX=36900 GN=SAHH PE=2 SV=1	SAHH_PHASS	SAHH	53 kDa	TRUE	unknown	4
252	TRUE	Empty	Succinate--CoA ligase [ADP-forming] subunit alpha, mitochondrial OS=Oryza sativa subsp. japonica OX=39947 GN=Os07g0577700 PE=1 SV=1	SUCA_ORYSJ	Os07g0577700	34 kDa		unknown	5
253	TRUE	Empty	40S ribosomal protein S10-1 OS=Oryza sativa subsp. japonica OX=39947 GN=RPS10-1 PE=2 SV=1	RS10A_ORYSJ (+1)	RPS10-1	20 kDa		unknown	4
254	TRUE	Empty	Organellar oligopeptidase A, chloroplastic/mitochondrial OS=Arabidopsis thaliana OX=3702 GN=OOP PE=1 SV=1	OOPDA_ARATH	OOP	89 kDa		unknown	4
255	TRUE	Empty	NADH dehydrogenase [ubiquinone] iron-sulfur protein 2 OS=Arabidopsis thaliana OX=3702 GN=NAD7 PE=1 SV=2	NDUS2_ARATH	NAD7	45 kDa		unknown	5
256	TRUE	Empty	Alpha/beta-gliadin A-IV OS=Triticum aestivum OX=4565 PE=2 SV=1	GDA4_WHEAT		34 kDa	TRUE	unknown	2
257	TRUE	Empty	60S ribosomal protein L15-1 OS=Picea mariana OX=3335 GN=SB61 PE=2 SV=1	RL15A_PICMA (+1)	SB61	24 kDa		unknown	3
258	TRUE	Empty	6-phosphogluconate dehydrogenase, decarboxylating 1 OS=Oryza sativa subsp. japonica OX=39947 GN=G6PGH1 PE=2 SV=1	6PGD1_ORYSJ	G6PGH1	53 kDa		unknown	5
259	TRUE	Empty	Putative aconitate hydratase, cytoplasmic OS=Oryza sativa subsp. japonica OX=39947 GN=Os08g0191100 PE=3 SV=1	ACOC_ORYSJ	Os08g0191100	98 kDa	TRUE	unknown	5
260	TRUE	Empty	Phospho-2-dehydro-3-deoxyheptonate aldolase 2, chloroplastic OS=Oryza sativa subsp. japonica OX=39947 GN=DAHPS2 PE=2 SV=1	AROG_ORYSJ	DAHPS2	59 kDa	TRUE	unknown	4
261	TRUE	Empty	Phosphoenolpyruvate carboxylase, housekeeping isozyme OS=Saccharum hybrid OX=15819 PE=3 SV=1	CAPP1_SACHY		110 kDa	TRUE	unknown	5
262	TRUE	Empty	Small heat shock protein, chloroplastic OS=Triticum aestivum OX=4565 GN=HSP21 PE=2 SV=1	HS21C_WHEAT	HSP21	27 kDa		unknown	3
263	TRUE	Empty	Pyruvate dehydrogenase E1 component subunit beta-1, mitochondrial OS=Oryza sativa subsp. japonica OX=39947 GN=Os08g0536000 PE=2 SV=1	ODPB1_ORYSJ	Os08g0536000	40 kDa		unknown	4
264	TRUE	Empty	Dolichyl-diphosphooligosaccharide--protein glycosyltransferase 48 kDa subunit OS=Oryza sativa subsp. japonica OX=39947 GN=OST48 PE=2 SV=1	OST48_ORYSJ	OST48	48 kDa		unknown	5
265	TRUE	Empty	Pyridoxal 5'-phosphate synthase subunit PDX1.1 OS=Arabidopsis thaliana OX=3702 GN=PDX11 PE=1 SV=1	PDX11_ARATH	PDX11	33 kDa	TRUE	unknown	4
266	TRUE	Empty	26S proteasome regulatory subunit 8 homolog A OS=Arabidopsis thaliana OX=3702 GN=RPT6A PE=1 SV=1	PRS8A_ARATH (+1)	RPT6A	47 kDa		unknown	4
267	TRUE	Empty	DEAD-box ATP-dependent RNA helicase 52C OS=Oryza sativa subsp. japonica OX=39947 GN=Os11g0599500 PE=3 SV=1	RH52C_ORYSJ	Os11g0599500	66 kDa	TRUE	unknown	5
268	TRUE	Empty	60S ribosomal protein L12 OS=Prunus armeniaca OX=36596 GN=RPL12 PE=2 SV=1	RL12_PRUAR	RPL12	18 kDa	TRUE	unknown	3
269	TRUE	Empty	Dolichyl-diphosphooligosaccharide--protein glycosyltransferase subunit 2 OS=Oryza sativa subsp. japonica OX=39947 GN=RPN2 PE=2 SV=1	RPN2_ORYSJ	RPN2	75 kDa		unknown	7
270	TRUE	Empty	40S ribosomal protein S12 OS=Hordeum vulgare OX=4513 GN=RPS12 PE=2 SV=1	RS12_HORVU	RPS12	15 kDa		unknown	3
271	TRUE	Empty	Tubulin beta-2 chain OS=Eleusine indica OX=29674 GN=TUBB2 PE=2 SV=1	TBB2_ELEIN (+1)	TUBB2	50 kDa	TRUE	unknown	4
272	TRUE	Empty	Inosine-5'-monophosphate dehydrogenase OS=Vigna unguiculata OX=3917 GN=impdh PE=1 SV=1	IMDH_VIGUN	impdh	53 kDa		unknown	3
273	TRUE	Empty	Nascent polypeptide-associated complex subunit alpha-like protein 1 OS=Arabidopsis thaliana OX=3702 GN=At3g12390 PE=1 SV=1	NACA1_ARATH (+1)	At3g12390	22 kDa		unknown	3
274	TRUE	Empty	Serine/threonine-protein kinase SRK2A OS=Arabidopsis thaliana OX=3702 GN=SRK2A PE=1 SV=1	SRK2A_ARATH (+1)	SRK2A	41 kDa		unknown	5
275	TRUE	Empty	Alcohol dehydrogenase class-3 OS=Zea mays OX=4577 GN=FDH PE=2 SV=1	ADHX_MAIZE	FDH	41 kDa	TRUE	unknown	4
276	TRUE	Empty	60S ribosomal protein L13-3 OS=Arabidopsis thaliana OX=3702 GN=RPL13D PE=1 SV=1	RL133_ARATH	RPL13D	23 kDa	TRUE	unknown	3
277	TRUE	Empty	Spermidine synthase 1 OS=Oryza sativa subsp. japonica OX=39947 GN=SPDSYN1 PE=2 SV=1	SPD1_ORYSJ	SPDSYN1	35 kDa		unknown	3
278	TRUE	Empty	Luminal-binding protein 3 OS=Zea mays OX=4577 GN=BIPE3 PE=2 SV=1	BIP3_MAIZE	BIPE3	73 kDa	TRUE	unknown	3
279	TRUE	Empty	Endoglucanase 3 OS=Arabidopsis thaliana OX=3702 GN=CEL5 PE=2 SV=2	GUN3_ARATH (+1)	CEL5	54 kDa		unknown	3
280	TRUE	Empty	Coatomer subunit beta-1 OS=Oryza sativa subsp. japonica OX=39947 GN=Os11g0174000 PE=2 SV=1	COPB1_ORYSJ	Os11g0174000	105 kDa		unknown	6
281	TRUE	Empty	Glyceraldehyde-3-phosphate dehydrogenase OS=Mus musculus OX=10090 GN=Gapdh PE=1 SV=2	G3P_MOUSE (+1)	Gapdh	36 kDa	TRUE	unknown	5
282	TRUE	Empty	UDP-D-apiose/UDP-D-xylose synthase 1 OS=Arabidopsis thaliana OX=3702 GN=AXS1 PE=1 SV=1	AXS1_ARATH (+1)	AXS1	44 kDa		unknown	4
283	TRUE	Empty	ERBB-3 BINDING PROTEIN 1 OS=Solanum tuberosum OX=4113 GN=EBP1 PE=2 SV=1	EBP1_SOLTU	EBP1	43 kDa		unknown	4
284	TRUE	Empty	Cell division control protein 48 homolog D OS=Arabidopsis thaliana OX=3702 GN=CDC48D PE=1 SV=1	CD48D_ARATH	CDC48D	90 kDa	TRUE	unknown	2
285	TRUE	Empty	40S ribosomal protein S17-1 OS=Arabidopsis thaliana OX=3702 GN=RPS17A PE=2 SV=3	RS171_ARATH (+4)	RPS17A	16 kDa		unknown	2
286	TRUE	Empty	40S ribosomal protein S19 OS=Oryza sativa subsp. japonica OX=39947 GN=RPS19A PE=2 SV=1	RS19_ORYSJ	RPS19A	16 kDa		unknown	4
287	TRUE	Empty	40S ribosomal protein S29 OS=Triticum aestivum OX=4565 GN=RPS29 PE=1 SV=1	RS29_WHEAT	RPS29	6 kDa		unknown	2
288	TRUE	Empty	Deoxymugineic acid synthase 1-A OS=Triticum aestivum OX=4565 GN=DMAS1-A PE=1 SV=1	DMS1A_WHEAT (+1)	DMAS1-A	35 kDa		unknown	5
289	TRUE	Empty	EC protein I/II OS=Triticum aestivum OX=4565 PE=1 SV=2	EC1_WHEAT		8 kDa	TRUE	unknown	3
290	TRUE	Empty	Actin-7 OS=Oryza sativa subsp. indica OX=39946 GN=ACT7 PE=3 SV=1	ACT7_ORYSI (+1)	ACT7	42 kDa	TRUE	unknown	3
291	TRUE	Empty	26S proteasome non-ATPase regulatory subunit 2 homolog A OS=Arabidopsis thaliana OX=3702 GN=RPN1A PE=1 SV=2	PSD2A_ARATH	RPN1A	98 kDa		unknown	4
292	TRUE	Empty	GTP-binding protein SAR1 OS=Nicotiana tabacum OX=4097 GN=SAR1 PE=2 SV=1	SAR1_TOBAC	SAR1	23 kDa	TRUE	unknown	5
293	TRUE	Empty	Elongation factor 1-delta 2 OS=Oryza sativa subsp. japonica OX=39947 GN=Os03g0406200 PE=2 SV=3	EF1D2_ORYSJ	Os03g0406200	25 kDa		unknown	3
294	TRUE	Empty	Glycine-rich RNA-binding protein blt801 OS=Hordeum vulgare OX=4513 GN=blt801 PE=1 SV=1	GRP_HORVU	blt801	16 kDa		unknown	3
295	TRUE	Empty	ATP synthase protein MI25 OS=Triticum timopheevii OX=4570 PE=3 SV=1	MI25_TRITI (+1)		22 kDa		unknown	4
296	TRUE	Empty	Proliferating cell nuclear antigen OS=Oryza sativa subsp. japonica OX=39947 GN=Os02g0805200 PE=1 SV=2	PCNA_ORYSJ	Os02g0805200	29 kDa		unknown	4
297	TRUE	Empty	Glucose-6-phosphate isomerase 1, chloroplastic OS=Arabidopsis thaliana OX=3702 GN=PGI1 PE=1 SV=1	G6PIP_ARATH	PGI1	67 kDa		unknown	4
298	TRUE	Empty	Glutamine--tRNA ligase OS=Lupinus luteus OX=3873 PE=2 SV=2	SYQ_LUPLU		90 kDa		unknown	3
299	TRUE	Empty	Lysine--tRNA ligase OS=Oryza sativa subsp. japonica OX=39947 GN=Os03g0586800 PE=2 SV=1	SYK_ORYSJ	Os03g0586800	68 kDa		unknown	5
300	TRUE	Empty	Serine/threonine-protein phosphatase 2A 65 kDa regulatory subunit A beta isoform OS=Arabidopsis thaliana OX=3702 GN=PP2AA2 PE=1 SV=2	2AAB_ARATH	PP2AA2	66 kDa		unknown	3
301	TRUE	Empty	Coatomer subunit delta-1 OS=Oryza sativa subsp. japonica OX=39947 GN=Os05g0310800 PE=2 SV=1	COPD1_ORYSJ	Os05g0310800	58 kDa		unknown	4
302	TRUE	Empty	Proteasome subunit alpha type-2 OS=Oryza sativa subsp. indica OX=39946 GN=PAB1 PE=2 SV=2	PSA2_ORYSI (+1)	PAB1	26 kDa		unknown	3
303	TRUE	Empty	Enoyl-[acyl-carrier-protein] reductase [NADH] 2, chloroplastic OS=Oryza sativa subsp. japonica OX=39947 GN=Os09g0277800 PE=2 SV=1	FABI2_ORYSJ	Os09g0277800	39 kDa		unknown	4
304	TRUE	Empty	2-isopropylmalate synthase A OS=Solanum pennellii OX=28526 GN=IPMSA PE=2 SV=1	LEU1A_SOLPN (+1)	IPMSA	64 kDa		unknown	3
305	TRUE	Empty	WD-40 repeat-containing protein MSI4 OS=Arabidopsis thaliana OX=3702 GN=MSI4 PE=1 SV=3	MSI4_ARATH	MSI4	56 kDa		unknown	3
306	TRUE	Empty	Defensin-like protein 2 OS=Triticum aestivum OX=4565 PE=1 SV=1	DEF2_WHEAT		5 kDa		unknown	3
307	TRUE	Empty	Sucrose synthase OS=Solanum lycopersicum OX=4081 PE=2 SV=1	SUS_SOLLC		92 kDa	TRUE	unknown	3
308	TRUE	Empty	40S ribosomal protein SA OS=Glycine max OX=3847 PE=2 SV=1	RSSA_SOYBN		34 kDa	TRUE	unknown	2
309	TRUE	Empty	1,2-dihydroxy-3-keto-5-methylthiopentene dioxygenase 2 OS=Oryza sativa subsp. indica OX=39946 GN=ARD2 PE=2 SV=2	MTND2_ORYSI (+1)	ARD2	23 kDa	TRUE	unknown	5
310	TRUE	Empty	Glucose-6-phosphate isomerase, cytosolic A OS=Oryza sativa subsp. japonica OX=39947 GN=Os03g0776000 PE=2 SV=2	G6PIA_ORYSJ (+2)	Os03g0776000	63 kDa		unknown	3
311	TRUE	Empty	Probable AMP deaminase OS=Oryza sativa subsp. japonica OX=39947 GN=AMPD PE=2 SV=1	AMPD_ORYSJ	AMPD	94 kDa	TRUE	unknown	4
312	TRUE	Empty	Ubiquitin-like modifier-activating enzyme 5 OS=Oryza sativa subsp. japonica OX=39947 GN=Os02g0506500 PE=2 SV=1	UBA5_ORYSJ	Os02g0506500	46 kDa		unknown	3
313	TRUE	Empty	Phosphoenolpyruvate carboxylase 1 OS=Arabidopsis thaliana OX=3702 GN=PPC1 PE=1 SV=1	CAPP1_ARATH	PPC1	110 kDa	TRUE	unknown	2
314	TRUE	Empty	Peroxygenase 1 OS=Avena sativa OX=4498 PE=1 SV=1	PXG1_AVESA		28 kDa		unknown	2
315	TRUE	Empty	L-ascorbate peroxidase 1, cytosolic OS=Oryza sativa subsp. indica OX=39946 GN=APX1 PE=2 SV=1	APX1_ORYSI (+1)	APX1	27 kDa	TRUE	unknown	3
316	TRUE	Empty	Serpin-ZX OS=Hordeum vulgare OX=4513 GN=PAZX PE=1 SV=1	SPZX_HORVU	PAZX	43 kDa	TRUE	unknown	3
317	TRUE	Empty	Heat shock cognate 90 kDa protein OS=Dictyostelium discoideum OX=44689 GN=hspD PE=1 SV=2	HSC90_DICDI	hspD	80 kDa	TRUE	unknown	3
318	TRUE	Empty	Actin OS=Crassostrea gigas OX=29159 PE=2 SV=1	ACT_CRAGI		42 kDa	TRUE	unknown	3
319	TRUE	Empty	Protein ILITYHIA OS=Arabidopsis thaliana OX=3702 GN=ILA PE=1 SV=1	ILA_ARATH	ILA	294 kDa		unknown	3
320	TRUE	Empty	Nucleoside diphosphate kinase 1 OS=Zea mays OX=4577 GN=ndpk1 PE=1 SV=1	NDK1_MAIZE	ndpk1	17 kDa		unknown	3
321	TRUE	Empty	60S ribosomal protein L30 OS=Triticum aestivum OX=4565 PE=1 SV=2	RL30_WHEAT		12 kDa		unknown	3
322	TRUE	Empty	Monodehydroascorbate reductase OS=Pisum sativum OX=3888 PE=1 SV=1	MDAR_PEA		47 kDa	TRUE	unknown	3
323	TRUE	Empty	T-complex protein 1 subunit theta OS=Arabidopsis thaliana OX=3702 GN=CCT8 PE=1 SV=1	TCPQ_ARATH	CCT8	59 kDa		unknown	3
324	TRUE	Empty	Histone H2A.2.1 OS=Triticum aestivum OX=4565 PE=1 SV=1	H2A2_WHEAT		16 kDa	TRUE	unknown	3
325	TRUE	Empty	Imidazole glycerol phosphate synthase hisHF, chloroplastic OS=Arabidopsis thaliana OX=3702 GN=HISN4 PE=2 SV=1	HIS4_ARATH	HISN4	64 kDa		unknown	4
326	TRUE	Empty	UPF0496 protein 1 OS=Oryza sativa subsp. indica OX=39946 GN=OsI_010151 PE=2 SV=1	U496A_ORYSI (+1)	OsI_010151	43 kDa		unknown	3
327	TRUE	Empty	40S ribosomal protein S27-1 OS=Arabidopsis thaliana OX=3702 GN=RPS27A PE=3 SV=1	RS271_ARATH (+2)	RPS27A	9 kDa		unknown	3
328	TRUE	Empty	V-type proton ATPase subunit B 1 OS=Hordeum vulgare OX=4513 PE=2 SV=1	VATB1_HORVU (+2)		54 kDa		unknown	6
329	TRUE	Empty	T-complex protein 1 subunit epsilon OS=Avena sativa OX=4498 PE=2 SV=1	TCPE2_AVESA		59 kDa	TRUE	unknown	3
330	TRUE	Empty	26S proteasome non-ATPase regulatory subunit 1 homolog B OS=Arabidopsis thaliana OX=3702 GN=RPN2B PE=1 SV=1	PSD1B_ARATH	RPN2B	109 kDa		unknown	4
331	TRUE	Empty	Glycine--tRNA ligase, mitochondrial 1 OS=Arabidopsis thaliana OX=3702 GN=At1g29880 PE=1 SV=1	SYGM1_ARATH	At1g29880	82 kDa		unknown	3
332	TRUE	Empty	Proteasome subunit alpha type-3 OS=Oryza sativa subsp. japonica OX=39947 GN=PAG1 PE=2 SV=1	PSA3_ORYSJ	PAG1	27 kDa		unknown	3
333	TRUE	Empty	Heat shock protein 81-3 OS=Oryza sativa subsp. japonica OX=39947 GN=HSP81-3 PE=1 SV=2	HSP83_ORYSJ	HSP81-3	80 kDa	TRUE	unknown	3
334	TRUE	Empty	40S ribosomal protein S15 OS=Oryza sativa subsp. japonica OX=39947 GN=RPS15 PE=2 SV=2	RS15_ORYSJ	RPS15	17 kDa		unknown	3
335	TRUE	Empty	Probable protein phosphatase 2C 27 OS=Oryza sativa subsp. japonica OX=39947 GN=Os02g0799000 PE=2 SV=1	P2C27_ORYSJ	Os02g0799000	39 kDa		unknown	3
336	TRUE	Empty	Betaine aldehyde dehydrogenase OS=Hordeum vulgare OX=4513 PE=2 SV=1	BADH_HORVU		54 kDa		unknown	3
337	TRUE	Empty	Histone H1 OS=Triticum aestivum OX=4565 PE=2 SV=2	H1_WHEAT		24 kDa		unknown	2
338	TRUE	Empty	Eukaryotic initiation factor 4A-1 OS=Oryza sativa subsp. japonica OX=39947 GN=Os06g0701100 PE=2 SV=2	IF4A1_ORYSJ	Os06g0701100	47 kDa	TRUE	unknown	2
339	TRUE	Empty	Serine/threonine-protein phosphatase PP2A-3 catalytic subunit OS=Arabidopsis thaliana OX=3702 GN=PP2A3 PE=1 SV=2	PP2A3_ARATH (+3)	PP2A3	36 kDa		unknown	2
340	TRUE	Empty	60S ribosomal protein L24 OS=Hordeum vulgare OX=4513 GN=RPL24 PE=2 SV=1	RL24_HORVU	RPL24	18 kDa		unknown	2
341	TRUE	Empty	UDP-glucuronic acid decarboxylase 6 OS=Arabidopsis thaliana OX=3702 GN=UXS6 PE=2 SV=1	UXS6_ARATH	UXS6	39 kDa	TRUE	unknown	4
342	TRUE	Empty	Coatomer subunit gamma-1 OS=Oryza sativa subsp. japonica OX=39947 GN=Os03g0227000 PE=2 SV=2	COPG1_ORYSJ	Os03g0227000	99 kDa	TRUE	unknown	3
343	TRUE	Empty	Nucleosome assembly protein 1;2 OS=Oryza sativa subsp. indica OX=39946 GN=NAP1;2 PE=1 SV=1	NAP1B_ORYSI (+1)	NAP1	42 kDa	TRUE	unknown	3
344	TRUE	Empty	Nonribosomal peptide synthase nlsA OS=Emericella nidulans (strain FGSC A4 / ATCC 38163 / CBS 112.46 / NRRL 194 / M139) OX=227321 GN=nlsA PE=3 SV=1	NLSA_EMENI	nlsA	677 kDa		unknown	6
345	TRUE	Empty	Acetolactate synthase small subunit 2, chloroplastic OS=Arabidopsis thaliana OX=3702 GN=At2g31810 PE=1 SV=1	ILVH2_ARATH	At2g31810	54 kDa		unknown	3
346	TRUE	Empty	60S ribosomal protein L44 OS=Trypanosoma brucei brucei OX=5702 GN=RPL44 PE=3 SV=3	RL44_TRYBB	RPL44	12 kDa		unknown	2
347	TRUE	Empty	Titin OS=Homo sapiens OX=9606 GN=TTN PE=1 SV=4	TITIN_HUMAN	TTN	3816 kDa		unknown	7
348	TRUE	Empty	60S ribosomal protein L19-1 OS=Arabidopsis thaliana OX=3702 GN=RPL19A PE=2 SV=1	RL191_ARATH (+1)	RPL19A	25 kDa		unknown	3
349	TRUE	Empty	Calnexin homolog 1 OS=Arabidopsis thaliana OX=3702 GN=CNX1 PE=1 SV=1	CALX1_ARATH	CNX1	60 kDa		unknown	2
350	TRUE	Empty	70 kDa peptidyl-prolyl isomerase OS=Triticum aestivum OX=4565 GN=FKBP70 PE=1 SV=1	FKB70_WHEAT	FKBP70	62 kDa		unknown	4
351	TRUE	Empty	Dihydrolipoyllysine-residue succinyltransferase component of 2-oxoglutarate dehydrogenase complex 2, mitochondrial OS=Arabidopsis thaliana OX=3702 GN=At4g26910 PE=1 SV=2	ODO2B_ARATH	At4g26910	50 kDa		unknown	3
352	TRUE	Empty	Glucose and ribitol dehydrogenase OS=Daucus carota OX=4039 GN=CAISE5 PE=2 SV=1	GRDH_DAUCA	CAISE5	32 kDa		unknown	2
353	TRUE	Empty	Protein disulfide-isomerase like 2-1 OS=Arabidopsis thaliana OX=3702 GN=PDIL2-1 PE=2 SV=1	PDI21_ARATH (+1)	PDIL2-1	39 kDa	TRUE	unknown	2
354	TRUE	Empty	Probable protein disulfide-isomerase A6 OS=Medicago sativa OX=3879 PE=2 SV=1	PDIA6_MEDSA		40 kDa	TRUE	unknown	2
355	TRUE	Empty	Importin beta-like SAD2 OS=Arabidopsis thaliana OX=3702 GN=SAD2 PE=1 SV=1	SAD2_ARATH	SAD2	119 kDa		unknown	3
356	TRUE	Empty	Proteasome subunit beta type-2 OS=Oryza sativa subsp. japonica OX=39947 GN=PBD1 PE=2 SV=2	PSB2_ORYSJ	PBD1	23 kDa		unknown	3
357	TRUE	Empty	Probable 2,3-bisphosphoglycerate-independent phosphoglycerate mutase 2 OS=Arabidopsis thaliana OX=3702 GN=At3g08590 PE=1 SV=1	PMG2_ARATH	At3g08590	61 kDa	TRUE	unknown	3
358	TRUE	Empty	Chaperone protein ClpB OS=Salmonella typhi OX=90370 GN=clpB PE=3 SV=1	CLPB_SALTI (+1)	clpB	95 kDa	TRUE	unknown	2
359	TRUE	Empty	60S ribosomal protein L22-2 OS=Arabidopsis thaliana OX=3702 GN=RPL22B PE=2 SV=1	RL222_ARATH (+1)	RPL22B	14 kDa		unknown	2
360	TRUE	Empty	60S ribosomal protein L37a-2 OS=Arabidopsis thaliana OX=3702 GN=RPL37AC PE=3 SV=1	R37A2_ARATH (+3)	RPL37AC	10 kDa		unknown	2
361	TRUE	Empty	ATP synthase subunit alpha, mitochondrial OS=Arabidopsis thaliana OX=3702 GN=ATPA PE=1 SV=2	ATPAM_ARATH	ATPA	55 kDa	TRUE	unknown	2
362	TRUE	Empty	Elongation factor 1-alpha OS=Daucus carota OX=4039 PE=2 SV=1	EF1A2_DAUCA		49 kDa	TRUE	unknown	4
363	TRUE	Empty	Elongation factor Tu OS=Eubacterium eligens (strain ATCC 27750 / VPI C15-48) OX=515620 GN=tuf PE=3 SV=1	EFTU_EUBE2	tuf	44 kDa	TRUE	unknown	4
364	TRUE	Empty	Malate dehydrogenase, glyoxysomal OS=Oryza sativa subsp. japonica OX=39947 GN=Os12g0632700 PE=1 SV=3	MDHG_ORYSJ	Os12g0632700	37 kDa		unknown	3
365	TRUE	Empty	Proteasome subunit alpha type-4-1 OS=Oryza sativa subsp. indica OX=39946 GN=OsI_021120 PE=1 SV=2	PSA4A_ORYSI (+4)	OsI_021120	27 kDa		unknown	3
366	TRUE	Empty	Dynamin-related protein 1B OS=Arabidopsis thaliana OX=3702 GN=DRP1B PE=1 SV=1	DRP1B_ARATH	DRP1B	68 kDa		unknown	4
367	TRUE	Empty	Aminopeptidase M1-A OS=Oryza sativa subsp. japonica OX=39947 GN=Os02g0218200 PE=2 SV=1	APM1A_ORYSJ	Os02g0218200	98 kDa		unknown	3
368	TRUE	Empty	Acetolactate synthase 1, chloroplastic OS=Oryza sativa subsp. japonica OX=39947 GN=ALS1 PE=2 SV=1	ILVB1_ORYSJ	ALS1	69 kDa		unknown	5
369	TRUE	Empty	Enolase OS=Streptococcus thermophilus (strain CNRZ 1066) OX=299768 GN=eno PE=3 SV=1	ENO_STRT1 (+2)	eno	47 kDa		unknown	4
370	TRUE	Empty	26S proteasome regulatory subunit 10B homolog A OS=Arabidopsis thaliana OX=3702 GN=RPT4A PE=1 SV=1	PS10A_ARATH	RPT4A	45 kDa		unknown	3
371	TRUE	Empty	Mitochondrial outer membrane porin OS=Triticum aestivum OX=4565 GN=VDAC1 PE=2 SV=1	VDAC1_WHEAT	VDAC1	29 kDa		unknown	3
372	TRUE	Empty	14-3-3-like protein GF14-6 OS=Zea mays OX=4577 GN=GRF1 PE=3 SV=1	14331_MAIZE	GRF1	30 kDa	TRUE	unknown	2
373	TRUE	Empty	Protein DNA-DAMAGE INDUCIBLE 1 OS=Arabidopsis thaliana OX=3702 GN=DDI1 PE=1 SV=1	DDI1_ARATH	DDI1	45 kDa		unknown	2
374	TRUE	Empty	Eukaryotic translation initiation factor 3 subunit B OS=Arabidopsis thaliana OX=3702 GN=TIF3B1 PE=1 SV=1	EIF3B_ARATH	TIF3B1	82 kDa		unknown	2
375	TRUE	Empty	Enolase 2 OS=Zea mays OX=4577 GN=ENO2 PE=2 SV=1	ENO2_MAIZE	ENO2	48 kDa	TRUE	unknown	2
376	TRUE	Empty	Eukaryotic translation initiation factor 1A OS=Triticum aestivum OX=4565 PE=1 SV=2	IF1A_WHEAT		16 kDa		unknown	2
377	TRUE	Empty	Prohibitin-2, mitochondrial OS=Arabidopsis thaliana OX=3702 GN=PHB2 PE=1 SV=1	PHB2_ARATH (+1)	PHB2	32 kDa		unknown	2
378	TRUE	Empty	Proteasome subunit alpha type-7-A OS=Oryza sativa subsp. indica OX=39946 GN=OsI_029135 PE=2 SV=2	PSA7A_ORYSI (+3)	OsI_029135	27 kDa		unknown	2
379	TRUE	Empty	60S ribosomal protein L27-2 OS=Arabidopsis thaliana OX=3702 GN=RPL27B PE=2 SV=2	RL272_ARATH (+2)	RPL27B	16 kDa		unknown	2
380	TRUE	Empty	40S ribosomal protein S20 OS=Dictyostelium discoideum OX=44689 GN=rps20 PE=3 SV=1	RS20_DICDI (+2)	rps20	14 kDa		unknown	2
381	TRUE	Empty	40S ribosomal protein S5 OS=Saccharomyces cerevisiae (strain ATCC 204508 / S288c) OX=559292 GN=RPS5 PE=1 SV=3	RS5_YEAST	RPS5	25 kDa		unknown	2
382	TRUE	Empty	Aspartate--tRNA ligase 1, cytoplasmic OS=Arabidopsis thaliana OX=3702 GN=At4g26870 PE=2 SV=1	SYDC1_ARATH	At4g26870	60 kDa		unknown	2
383	TRUE	Empty	B3-hordein (Fragment) OS=Hordeum vulgare OX=4513 PE=1 SV=1	HOR3_HORVU		30 kDa		unknown	2
384	TRUE	Empty	Oxygen-dependent coproporphyrinogen-III oxidase, chloroplastic OS=Hordeum vulgare OX=4513 GN=CPX PE=2 SV=1	HEM6_HORVU	CPX	44 kDa		unknown	3
385	TRUE	Empty	Starch synthase 1, chloroplastic/amyloplastic OS=Triticum aestivum OX=4565 GN=WSSI-2 PE=2 SV=2	SSY1_WHEAT	WSSI-2	71 kDa		unknown	4
386	TRUE	Empty	Leghemoglobin reductase OS=Vigna unguiculata OX=3917 GN=FLBR PE=1 SV=1	LEGRE_VIGUN	FLBR	56 kDa		unknown	3
387	TRUE	Empty	Protein translation factor SUI1 homolog OS=Oryza sativa subsp. indica OX=39946 GN=GOS2 PE=2 SV=1	SUI1_ORYSI (+2)	GOS2	13 kDa	TRUE	unknown	3
388	TRUE	Empty	60S ribosomal protein L26-2 OS=Arabidopsis thaliana OX=3702 GN=RPL26B PE=2 SV=1	RL262_ARATH	RPL26B	17 kDa		unknown	2
389	TRUE	Empty	Chaperone protein DnaK OS=Ehrlichia canis (strain Jake) OX=269484 GN=dnaK PE=3 SV=1	DNAK_EHRCJ	dnaK	69 kDa		unknown	4
390	TRUE	Empty	40S ribosomal protein S11 OS=Euphorbia esula OX=3993 GN=RPS11 PE=2 SV=1	RS11_EUPES	RPS11	18 kDa	TRUE	unknown	2
391	TRUE	Empty	Acyl transferase 9 OS=Oryza sativa subsp. japonica OX=39947 GN=AT9 PE=2 SV=1	AT9_ORYSJ	AT9	46 kDa		unknown	4
392	TRUE	Empty	Dynamin-related protein 1E OS=Arabidopsis thaliana OX=3702 GN=DRP1E PE=1 SV=1	DRP1E_ARATH	DRP1E	70 kDa		unknown	4
393	TRUE	Empty	Acetylornithine deacetylase OS=Arabidopsis thaliana OX=3702 GN=At4g17830 PE=2 SV=1	ARGE_ARATH	At4g17830	48 kDa		unknown	2
394	TRUE	Empty	Actin OS=Mesostigma viride OX=41882 PE=3 SV=1	ACT_MESVI		42 kDa	TRUE	unknown	2
395	TRUE	Empty	Heat shock protein 90-4 OS=Arabidopsis thaliana OX=3702 GN=HSP90-4 PE=1 SV=1	HS904_ARATH	HSP90-4	80 kDa	TRUE	unknown	3
396	TRUE	Empty	Ubiquitin-conjugating enzyme E2 36 OS=Arabidopsis thaliana OX=3702 GN=UBC36 PE=1 SV=1	UBC36_ARATH	UBC36	17 kDa		unknown	3
397	TRUE	Empty	26S proteasome regulatory subunit 6A homolog B OS=Arabidopsis thaliana OX=3702 GN=RPT5B PE=1 SV=3	PS6AB_ARATH	RPT5B	47 kDa		unknown	5
398	TRUE	Empty	2-Cys peroxiredoxin BAS1-like, chloroplastic OS=Arabidopsis thaliana OX=3702 GN=At5g06290 PE=2 SV=3	BAS1B_ARATH	At5g06290	30 kDa	TRUE	unknown	2
399	TRUE	Empty	40S ribosomal protein S3a OS=Ostreococcus lucimarinus (strain CCE9901) OX=436017 GN=OSTLU_28528 PE=3 SV=1	RS3A_OSTLU	OSTLU_28528	29 kDa	TRUE	unknown	2
400	TRUE	Empty	Selenium-binding protein 1 OS=Arabidopsis thaliana OX=3702 GN=SBP1 PE=1 SV=1	SEBP1_ARATH	SBP1	54 kDa		unknown	2
401	TRUE	Empty	Filaggrin-2 OS=Homo sapiens OX=9606 GN=FLG2 PE=1 SV=1	FILA2_HUMAN	FLG2	248 kDa		unknown	2
402	TRUE	Empty	Elongation factor Tu OS=Synechococcus sp. (strain CC9902) OX=316279 GN=tuf PE=3 SV=1	EFTU_SYNS9	tuf	44 kDa	TRUE	unknown	2
403	TRUE	Empty	Subtilisin-chymotrypsin inhibitor WSCI OS=Triticum aestivum OX=4565 PE=1 SV=2	ICIW_WHEAT		9 kDa		unknown	2
404	TRUE	Empty	Probable aldo-keto reductase 1 OS=Glycine max OX=3847 GN=AKR1 PE=2 SV=1	AKR1_SOYBN	AKR1	38 kDa		unknown	2
405	TRUE	Empty	Serine hydroxymethyltransferase 5 OS=Arabidopsis thaliana OX=3702 GN=SHM5 PE=3 SV=1	GLYC5_ARATH	SHM5	52 kDa	TRUE	unknown	2
406	TRUE	Empty	40S ribosomal protein S14 OS=Zea mays OX=4577 PE=3 SV=1	RS141_MAIZE (+1)		16 kDa	TRUE	unknown	2
407	TRUE	Empty	Protein disulfide-isomerase OS=Zea mays OX=4577 GN=PDI PE=2 SV=1	PDI_MAIZE	PDI	57 kDa	TRUE	unknown	2
408	TRUE	Empty	Formate dehydrogenase 2, mitochondrial OS=Oryza sativa subsp. japonica OX=39947 GN=Os06g0486900 PE=2 SV=1	FDH2_ORYSJ	Os06g0486900	41 kDa	TRUE	unknown	2
409	TRUE	Empty	Ketol-acid reductoisomerase, chloroplastic OS=Pisum sativum OX=3888 GN=PGAAIR PE=2 SV=1	ILV5_PEA	PGAAIR	63 kDa	TRUE	unknown	2
410	TRUE	Empty	Elongation factor Tu OS=Gluconacetobacter diazotrophicus (strain ATCC 49037 / DSM 5601 / PAl5) OX=272568 GN=tuf PE=3 SV=1	EFTU_GLUDA	tuf	43 kDa	TRUE	unknown	2
411	TRUE	Empty	60S ribosomal protein L21 OS=Cyanophora paradoxa OX=2762 GN=RPL21 PE=2 SV=1	RL21_CYAPA	RPL21	18 kDa		unknown	2
412	TRUE	Empty	Q8I3Z1-DECOY	Q8I3Z1-DECOY		?		unknown	6
413	TRUE	Empty	Beta-adaptin-like protein A OS=Arabidopsis thaliana OX=3702 GN=BETAA-AD PE=1 SV=1	APBLA_ARATH	BETAA-AD	93 kDa		unknown	3
414	TRUE	Empty	Formate--tetrahydrofolate ligase OS=Spinacia oleracea OX=3562 PE=1 SV=3	FTHS_SPIOL		68 kDa	TRUE	unknown	3
415	TRUE	Empty	Argininosuccinate synthase, chloroplastic OS=Arabidopsis thaliana OX=3702 GN=At4g24830 PE=1 SV=3	ASSY_ARATH	At4g24830	54 kDa		unknown	3
416	TRUE	Empty	Heat shock 70 kDa protein 10, mitochondrial OS=Arabidopsis thaliana OX=3702 GN=HSP70-10 PE=1 SV=1	HSP7J_ARATH	HSP70-10	73 kDa	TRUE	unknown	3
417	TRUE	Empty	Asparagine synthetase [glutamine-hydrolyzing] 2 OS=Oryza sativa subsp. japonica OX=39947 GN=Os06g0265000 PE=2 SV=3	ASNS2_ORYSJ	Os06g0265000	66 kDa		unknown	3
418	TRUE	Empty	Leucine aminopeptidase OS=Oryza sativa subsp. japonica OX=39947 GN=LKHA4 PE=2 SV=1	LKHA4_ORYSJ	LKHA4	68 kDa		unknown	3
419	TRUE	Empty	Calmodulin-1 OS=Arabidopsis thaliana OX=3702 GN=CAM1 PE=1 SV=1	CALM1_ARATH (+26)	CAM1	17 kDa		unknown	2
420	TRUE	Empty	Gamma-gliadin OS=Triticum aestivum OX=4565 PE=3 SV=1	GDBX_WHEAT		34 kDa		unknown	2
421	TRUE	Empty	3-oxoacyl-[acyl-carrier-protein] synthase I, chloroplastic OS=Hordeum vulgare OX=4513 GN=KAS12 PE=1 SV=1	KASC1_HORVU	KAS12	49 kDa		unknown	2
422	TRUE	Empty	40S ribosomal protein S8-2 OS=Arabidopsis thaliana OX=3702 GN=RPS8B PE=2 SV=1	RS82_ARATH	RPS8B	24 kDa		unknown	2
423	TRUE	Empty	RuBisCO large subunit-binding protein subunit alpha (Fragment) OS=Ricinus communis OX=3988 PE=2 SV=1	RUBA_RICCO		52 kDa	TRUE	unknown	2
424	TRUE	Empty	Glucose-1-phosphate adenylyltransferase large subunit 2, cytosolic OS=Oryza sativa subsp. japonica OX=39947 GN=AGPL2 PE=1 SV=1	GLGL2_ORYSJ	AGPL2	58 kDa	TRUE	unknown	3
425	TRUE	Empty	4-alpha-glucanotransferase DPE1, chloroplastic/amyloplastic OS=Oryza sativa subsp. japonica OX=39947 GN=DPE1 PE=2 SV=2	DPE1_ORYSJ	DPE1	66 kDa		unknown	2
426	TRUE	Empty	Tubulin beta-2 chain (Fragment) OS=Anemia phyllitidis OX=12940 GN=TUBB2 PE=2 SV=1	TBB2_ANEPH	TUBB2	46 kDa	TRUE	unknown	3
427	TRUE	Empty	Chaperone protein DnaK OS=Syntrophus aciditrophicus (strain SB) OX=56780 GN=dnaK PE=3 SV=1	DNAK_SYNAS	dnaK	68 kDa	TRUE	unknown	4
428	TRUE	Empty	Aquaporin TIP3-1 OS=Zea mays OX=4577 GN=TIP3-1 PE=2 SV=1	TIP31_MAIZE (+2)	TIP3-1	27 kDa		unknown	2
429	TRUE	Empty	T-complex protein 1 subunit alpha OS=Arabidopsis thaliana OX=3702 GN=CCT1 PE=1 SV=1	TCPA_ARATH	CCT1	59 kDa		unknown	2
430	TRUE	Empty	Beta-enolase OS=Homo sapiens OX=9606 GN=ENO3 PE=1 SV=5	ENOB_HUMAN (+2)	ENO3	47 kDa	TRUE	unknown	4
431	TRUE	Empty	Glycylpeptide N-tetradecanoyltransferase 1 OS=Arabidopsis thaliana OX=3702 GN=NMT1 PE=1 SV=2	NMT1_ARATH	NMT1	50 kDa		unknown	3
432	TRUE	Empty	Late embryogenesis abundant protein 17 OS=Oryza sativa subsp. japonica OX=39947 GN=LEA17 PE=2 SV=1	LEA17_ORYSJ (+1)	LEA17	37 kDa		unknown	2
433	TRUE	Empty	Defensin-like protein 1 OS=Triticum aestivum OX=4565 PE=1 SV=1	DEF1_WHEAT		5 kDa		unknown	2
434	TRUE	Empty	Aminopeptidase M1-B OS=Oryza sativa subsp. japonica OX=39947 GN=Os08g0398700 PE=2 SV=1	APM1B_ORYSJ	Os08g0398700	98 kDa		unknown	3
435	TRUE	Empty	40S ribosomal protein S30 OS=Arabidopsis thaliana OX=3702 GN=RPS30A PE=3 SV=3	RS30_ARATH	RPS30A	7 kDa		unknown	2
436	TRUE	Empty	V-type proton ATPase subunit E OS=Mesembryanthemum crystallinum OX=3544 GN=VATE PE=2 SV=1	VATE_MESCR	VATE	26 kDa		unknown	2
437	TRUE	Empty	Actin-1/4 OS=Diphyllobothrium dendriticum OX=28845 GN=ACT1 PE=2 SV=1	ACT1_DIPDE (+2)	ACT1	42 kDa	TRUE	unknown	2
438	TRUE	Empty	Acylamino-acid-releasing enzyme 1 OS=Oryza sativa subsp. japonica OX=39947 GN=Os10g0415600 PE=3 SV=1	AARE1_ORYSJ	Os10g0415600	85 kDa		unknown	2
439	TRUE	Empty	Alpha-2-purothionin OS=Triticum aestivum OX=4565 GN=THI1.2 PE=2 SV=1	THN2_WHEAT	THI1	15 kDa	TRUE	unknown	2
440	TRUE	Empty	Tubulin beta-8 chain OS=Zea mays OX=4577 GN=TUBB8 PE=2 SV=1	TBB8_MAIZE	TUBB8	50 kDa	TRUE	unknown	3
441	TRUE	Empty	5-methyltetrahydropteroyltriglutamate--homocysteine methyltransferase 2 OS=Arabidopsis thaliana OX=3702 GN=MS2 PE=1 SV=1	METE2_ARATH	MS2	85 kDa	TRUE	unknown	3
442	TRUE	Empty	Histone H3.2 OS=Arabidopsis thaliana OX=3702 GN=HTR2 PE=1 SV=2	H32_ARATH (+18)	HTR2	15 kDa		unknown	3
443	TRUE	Empty	26S proteasome regulatory subunit 7 homolog OS=Schizosaccharomyces pombe (strain 972 / ATCC 24843) OX=284812 GN=rpt1 PE=1 SV=2	PRS7_SCHPO	rpt1	49 kDa	TRUE	unknown	3
444	TRUE	Empty	Thioredoxin H-type OS=Triticum aestivum OX=4565 PE=2 SV=3	TRXH_WHEAT		14 kDa		unknown	2
445	TRUE	Empty	Chaperone protein DnaK OS=Desulfitobacterium hafniense (strain DCB-2 / DSM 10664) OX=272564 GN=dnaK PE=3 SV=1	DNAK_DESHD	dnaK	66 kDa		unknown	2
446	TRUE	Empty	Probable histone H2A.4 OS=Oryza sativa subsp. indica OX=39946 GN=OsI_019561 PE=3 SV=1	H2A4_ORYSI (+5)	OsI_019561	17 kDa	TRUE	unknown	2
447	TRUE	Empty	Proteasome subunit beta type-1 OS=Oryza sativa subsp. japonica OX=39947 GN=PBF1 PE=2 SV=1	PSB1_ORYSJ	PBF1	24 kDa		unknown	4
448	TRUE	Empty	Fructan 1-exohydrolase OS=Aegilops speltoides OX=4573 GN=1-FEH PE=3 SV=1	1FEH_AEGSP	1-FEH	66 kDa		unknown	3
449	TRUE	Empty	3-ketoacyl-CoA thiolase 5, peroxisomal OS=Arabidopsis thaliana OX=3702 GN=KAT5 PE=1 SV=2	THIK5_ARATH	KAT5	48 kDa		unknown	3
450	TRUE	Empty	Abscisic acid receptor PYL9 OS=Oryza sativa subsp. japonica OX=39947 GN=PYL9 PE=1 SV=1	PYL9_ORYSJ	PYL9	22 kDa		unknown	3
451	TRUE	Empty	Nucleoside diphosphate kinase 3 OS=Spinacia oleracea OX=3562 PE=1 SV=1	NDK3_SPIOL		17 kDa		unknown	3
452	TRUE	Empty	Polyadenylate-binding protein, cytoplasmic and nuclear OS=Neurospora crassa (strain ATCC 24698 / 74-OR23-1A / CBS 708.71 / DSM 1257 / FGSC 987) OX=367110 GN=pabp-1 PE=3 SV=1	PABP_NEUCR	pabp-1	82 kDa		unknown	3
453	TRUE	Empty	Serine/threonine-protein kinase MEC1 OS=Kluyveromyces lactis (strain ATCC 8585 / CBS 2359 / DSM 70799 / NBRC 1267 / NRRL Y-1140 / WM37) OX=284590 GN=MEC1 PE=3 SV=1	ATR_KLULA	MEC1	263 kDa		unknown	4
454	TRUE	Empty	Cullin-associated NEDD8-dissociated protein 1 OS=Arabidopsis thaliana OX=3702 GN=CAND1 PE=1 SV=1	CAND1_ARATH	CAND1	135 kDa		unknown	2
455	TRUE	Empty	Zinc finger CCCH domain-containing protein 12 OS=Oryza sativa subsp. japonica OX=39947 GN=Os01g0917400 PE=2 SV=2	C3H12_ORYSJ	Os01g0917400	48 kDa		unknown	2
456	TRUE	Empty	Heat shock protein 82 OS=Zea mays OX=4577 GN=HSP82 PE=3 SV=1	HSP82_MAIZE	HSP82	82 kDa	TRUE	unknown	2
457	TRUE	Empty	26S proteasome non-ATPase regulatory subunit 12 homolog B OS=Arabidopsis thaliana OX=3702 GN=RPN5B PE=1 SV=1	PS12B_ARATH	RPN5B	51 kDa		unknown	3
458	TRUE	Empty	14-3-3 protein 2 OS=Solanum lycopersicum OX=4081 GN=TFT2 PE=3 SV=2	14332_SOLLC	TFT2	29 kDa	TRUE	unknown	2
459	TRUE	Empty	P29837-DECOY	P29837-DECOY		?		unknown	2
460	TRUE	Empty	Probable nucleoredoxin 1-2 OS=Oryza sativa subsp. japonica OX=39947 GN=Os03g0405900 PE=2 SV=1	NRX12_ORYSJ	Os03g0405900	64 kDa		unknown	2
461	TRUE	Empty	Pantothenate kinase 2 OS=Oryza sativa subsp. japonica OX=39947 GN=Os09g0533100 PE=2 SV=2	PANK2_ORYSJ	Os09g0533100	99 kDa		unknown	3
462	TRUE	Empty	Sucrose-phosphatase 2 OS=Oryza sativa subsp. japonica OX=39947 GN=SPP2 PE=1 SV=1	SPP2_ORYSJ	SPP2	47 kDa		unknown	3
463	TRUE	Empty	Chaperone protein DnaK OS=Maricaulis maris (strain MCS10) OX=394221 GN=dnaK PE=3 SV=1	DNAK_MARMM	dnaK	69 kDa	TRUE	unknown	3
464	TRUE	Empty	Malate dehydrogenase 1, mitochondrial OS=Arabidopsis thaliana OX=3702 GN=At1g53240 PE=1 SV=1	MDHM1_ARATH (+1)	At1g53240	36 kDa	TRUE	unknown	3
465	TRUE	Empty	Adenosine kinase 1 OS=Arabidopsis thaliana OX=3702 GN=ADK1 PE=1 SV=1	ADK1_ARATH (+1)	ADK1	38 kDa		unknown	2
466	TRUE	Empty	Phosphoenolpyruvate carboxylase 2 OS=Zea mays OX=4577 GN=PEP4 PE=2 SV=1	CAPP2_MAIZE	PEP4	110 kDa	TRUE	unknown	2
467	TRUE	Empty	Chaperonin CPN60-2, mitochondrial OS=Cucurbita maxima OX=3661 GN=CPN60-2 PE=1 SV=1	CH62_CUCMA	CPN60-2	61 kDa	TRUE	unknown	2
468	TRUE	Empty	Heat shock 70 kDa protein 8 OS=Arabidopsis thaliana OX=3702 GN=HSP70-8 PE=1 SV=1	HSP7H_ARATH	HSP70-8	61 kDa		unknown	2
469	TRUE	Empty	Importin subunit alpha-1b OS=Oryza sativa subsp. japonica OX=39947 GN=Os05g0155601 PE=1 SV=2	IMA1B_ORYSJ	Os05g0155601	59 kDa	TRUE	unknown	2
470	TRUE	Empty	Proteasome subunit beta type-7-B OS=Arabidopsis thaliana OX=3702 GN=PBB2 PE=1 SV=2	PSB7B_ARATH	PBB2	30 kDa		unknown	2
471	TRUE	Empty	Ubiquitin-conjugating enzyme E2 10 OS=Arabidopsis thaliana OX=3702 GN=UBC10 PE=1 SV=1	UBC10_ARATH (+6)	UBC10	17 kDa		unknown	2
472	TRUE	Empty	ATP synthase subunit alpha, mitochondrial OS=Bos taurus OX=9913 GN=ATP5F1A PE=1 SV=1	ATPA_BOVIN (+6)	ATP5F1A	60 kDa	TRUE	unknown	3
473	TRUE	Empty	15-cis-phytoene desaturase, chloroplastic/chromoplastic OS=Oncidium hybrid cultivar OX=141207 GN=PDS PE=2 SV=1	PDS_ONCHC	PDS	65 kDa		unknown	2
474	TRUE	Empty	ATP-dependent Clp protease proteolytic subunit OS=Ruegeria pomeroyi (strain ATCC 700808 / DSM 15171 / DSS-3) OX=246200 GN=clpP PE=3 SV=1	CLPP_RUEPO	clpP	23 kDa		unknown	2
475	TRUE	Empty	Uridine 5'-monophosphate synthase OS=Arabidopsis thaliana OX=3702 GN=PYRE-F PE=2 SV=2	UMPS_ARATH	PYRE-F	52 kDa		unknown	2
476	TRUE	Empty	Serine--tRNA ligase, cytoplasmic OS=Arabidopsis thaliana OX=3702 GN=At5g27470 PE=1 SV=1	SYSC_ARATH	At5g27470	52 kDa		unknown	2
477	TRUE	Empty	Probable diaminopimelate decarboxylase, chloroplastic OS=Oryza sativa subsp. japonica OX=39947 GN=LYSA PE=2 SV=1	DCDA_ORYSJ	LYSA	53 kDa		unknown	2
478	TRUE	Empty	Type-5 thionin OS=Triticum aestivum OX=4565 GN=TTHV PE=2 SV=1	THN5_WHEAT	TTHV	14 kDa		unknown	2
479	TRUE	Empty	UTP--glucose-1-phosphate uridylyltransferase OS=Pyrus pyrifolia OX=3767 PE=2 SV=1	UGPA_PYRPY		52 kDa	TRUE	unknown	3
480	TRUE	Empty	Eukaryotic translation initiation factor 4E-1 OS=Triticum aestivum OX=4565 PE=1 SV=3	IF4E1_WHEAT		24 kDa		unknown	2
481	TRUE	Empty	Chaperone protein DnaK OS=Geobacillus sp. (strain WCH70) OX=471223 GN=dnaK PE=3 SV=1	DNAK_GEOSW	dnaK	66 kDa		unknown	3
482	TRUE	Empty	Actin-5, muscle-specific OS=Bactrocera dorsalis OX=27457 PE=2 SV=1	ACT5_BACDO		42 kDa	TRUE	unknown	2
483	TRUE	Empty	26S proteasome non-ATPase regulatory subunit 6 homolog OS=Arabidopsis thaliana OX=3702 GN=RPN7 PE=1 SV=1	PSMD6_ARATH	RPN7	44 kDa		unknown	2
484	TRUE	Empty	Heat shock 70 kDa protein homolog OS=Schistosoma mansoni OX=6183 PE=2 SV=2	HSP70_SCHMA		70 kDa	TRUE	unknown	2
485	TRUE	Empty	Proline--tRNA ligase, cytoplasmic OS=Arabidopsis thaliana OX=3702 GN=At3g62120 PE=1 SV=1	SYPC_ARATH	At3g62120	61 kDa		unknown	2
486	TRUE	Empty	Putative diaminopimelate epimerase, chloroplastic OS=Oryza sativa subsp. indica OX=39946 GN=DAPF PE=3 SV=1	DAPF_ORYSI (+1)	DAPF	38 kDa		unknown	2
487	TRUE	Empty	Beta-glucosidase 1 OS=Oryza sativa subsp. japonica OX=39947 GN=BGLU1 PE=2 SV=1	BGL01_ORYSJ	BGLU1	58 kDa	TRUE	unknown	2
488	TRUE	Empty	Phosphoenolpyruvate carboxylase OS=Picea abies OX=3329 GN=PPC PE=2 SV=1	CAPP_PICAB	PPC	110 kDa	TRUE	unknown	2
489	TRUE	Empty	Probable mannose-1-phosphate guanylyltransferase 1 OS=Oryza sativa subsp. japonica OX=39947 GN=Os03g0268400 PE=2 SV=1	GMPP1_ORYSJ	Os03g0268400	39 kDa		unknown	3
490	TRUE	Empty	Tubulin beta-1 chain OS=Glycine max OX=3847 GN=TUBB1 PE=3 SV=1	TBB1_SOYBN	TUBB1	50 kDa	TRUE	unknown	2
491	TRUE	Empty	Calcium-dependent protein kinase 15 OS=Oryza sativa subsp. japonica OX=39947 GN=CPK15 PE=2 SV=1	CDPKF_ORYSJ	CPK15	61 kDa		unknown	2
492	TRUE	Empty	Cell division protein FtsZ homolog 2-1, chloroplastic OS=Arabidopsis thaliana OX=3702 GN=FTSZ2-1 PE=1 SV=2	FTZ21_ARATH	FTSZ2-1	51 kDa		unknown	2
493	TRUE	Empty	Alanine--tRNA ligase OS=Arabidopsis thaliana OX=3702 GN=ALATS PE=1 SV=3	SYA_ARATH	ALATS	110 kDa		unknown	2
494	TRUE	Empty	Cupincin OS=Oryza sativa subsp. japonica OX=39947 GN=Os03g0793700 PE=1 SV=2	CUCIN_ORYSJ	Os03g0793700	52 kDa		unknown	2
495	TRUE	Empty	Probable sucrose-phosphate synthase 4 OS=Oryza sativa subsp. japonica OX=39947 GN=SPS4 PE=2 SV=1	SPSA4_ORYSJ	SPS4	119 kDa		unknown	2
496	TRUE	Empty	Heat shock 70 kDa protein 9, mitochondrial OS=Arabidopsis thaliana OX=3702 GN=HSP70-9 PE=1 SV=1	HSP7I_ARATH (+1)	HSP70-9	73 kDa	TRUE	unknown	2
497	TRUE	Empty	60S ribosomal protein L14-1 OS=Arabidopsis thaliana OX=3702 GN=RPL14A PE=2 SV=1	RL141_ARATH	RPL14A	16 kDa		unknown	2
498	TRUE	Empty	3-isopropylmalate dehydratase large subunit, chloroplastic OS=Arabidopsis thaliana OX=3702 GN=IIL1 PE=1 SV=1	LEUC_ARATH	IIL1	55 kDa		unknown	2
499	TRUE	Empty	Histidine--tRNA ligase OS=Parabacteroides distasonis (strain ATCC 8503 / DSM 20701 / CIP 104284 / JCM 5825 / NCTC 11152) OX=435591 GN=hisS PE=3 SV=1	SYH_PARD8	hisS	51 kDa		unknown	2
500	TRUE	Empty	Chaperone protein DnaK OS=Mycobacterium abscessus (strain ATCC 19977 / DSM 44196 / CIP 104536 / JCM 13569 / NCTC 13031 / TMC 1543) OX=561007 GN=dnaK PE=3 SV=1	DNAK_MYCA9	dnaK	66 kDa		unknown	2
501	TRUE	Empty	Phosphoenolpyruvate carboxylase 2 OS=Arabidopsis thaliana OX=3702 GN=PPC2 PE=1 SV=2	CAPP2_ARATH	PPC2	110 kDa	TRUE	unknown	2
502	TRUE	Empty	Peroxiredoxin-2C OS=Oryza sativa subsp. japonica OX=39947 GN=PRXIIC PE=1 SV=1	PRX2C_ORYSJ	PRXIIC	17 kDa		unknown	2
503	TRUE	Empty	Eukaryotic translation initiation factor isoform 4E-2 OS=Triticum aestivum OX=4565 PE=1 SV=1	IF4E2_WHEAT		24 kDa		unknown	2
504	TRUE	Empty	UTP--glucose-1-phosphate uridylyltransferase 2 OS=Arabidopsis thaliana OX=3702 GN=UGP2 PE=1 SV=1	UGPA2_ARATH	UGP2	52 kDa	TRUE	unknown	2
505	TRUE	Empty	Delta-aminolevulinic acid dehydratase, chloroplastic OS=Hordeum vulgare OX=4513 GN=HEMB PE=2 SV=1	HEM2_HORVU	HEMB	46 kDa	TRUE	unknown	2
506	TRUE	Empty	Chaperone protein DnaK OS=Symbiobacterium thermophilum (strain T / IAM 14863) OX=292459 GN=dnaK PE=3 SV=1	DNAK_SYMTH	dnaK	66 kDa		unknown	3
507	TRUE	Empty	Serine/threonine protein kinase OSK4 OS=Oryza sativa subsp. indica OX=39946 GN=OSK4 PE=3 SV=1	OSK4_ORYSI (+1)	OSK4	58 kDa		unknown	2
508	TRUE	Empty	Chaperone protein DnaK OS=Buchnera aphidicola subsp. Acyrthosiphon pisum (strain 5A) OX=563178 GN=dnaK PE=3 SV=1	DNAK_BUCA5 (+2)	dnaK	70 kDa		unknown	3
509	TRUE	Empty	Probable 6-phosphogluconolactonase 4, chloroplastic OS=Oryza sativa subsp. indica OX=39946 GN=OsI_031067 PE=3 SV=2	6PGL4_ORYSI (+1)	OsI_031067	35 kDa		unknown	2
510	TRUE	Empty	60S ribosomal protein L10-2 OS=Oryza sativa subsp. indica OX=39946 GN=SG12 PE=2 SV=2	RL102_ORYSI (+1)	SG12	25 kDa	TRUE	unknown	2
511	TRUE	Empty	40S ribosomal protein S26 OS=Oryza sativa subsp. japonica OX=39947 GN=RPS26 PE=2 SV=2	RS26_ORYSJ	RPS26	15 kDa		unknown	2
512	TRUE	Empty	60S ribosomal protein L10a OS=Oryza sativa subsp. indica OX=39946 GN=RPL10A PE=3 SV=1	R10A_ORYSI (+1)	RPL10A	24 kDa	TRUE	unknown	2
513	TRUE	Empty	Phospho-2-dehydro-3-deoxyheptonate aldolase 1, chloroplastic OS=Solanum tuberosum OX=4113 GN=SHKA PE=1 SV=2	AROF_SOLTU (+1)	SHKA	60 kDa	TRUE	unknown	2
514	TRUE	Empty	Vacuolar-processing enzyme OS=Ricinus communis OX=3988 PE=1 SV=1	VPE_RICCO		55 kDa		unknown	2
515	TRUE	Empty	Lactoylglutathione lyase OS=Solanum lycopersicum OX=4081 GN=GLX1 PE=2 SV=1	LGUL_SOLLC	GLX1	21 kDa		unknown	2
516	TRUE	Empty	Defensin Tk-AMP-D4 OS=Triticum kiharae OX=376535 PE=1 SV=1	DEF4_TRIKH		5 kDa		unknown	2
517	TRUE	Empty	60S ribosomal protein L15-A OS=Saccharomyces cerevisiae (strain ATCC 204508 / S288c) OX=559292 GN=RPL15A PE=1 SV=3	RL15A_YEAST	RPL15A	24 kDa		unknown	2
518	TRUE	Empty	Eukaryotic translation initiation factor 3 subunit D OS=Xenopus laevis OX=8355 GN=eif3d PE=2 SV=1	EIF3D_XENLA	eif3d	64 kDa		unknown	2
519	TRUE	Empty	Guanosine nucleotide diphosphate dissociation inhibitor 1 OS=Arabidopsis thaliana OX=3702 GN=GDI1 PE=1 SV=1	GDI1_ARATH	GDI1	50 kDa		unknown	2
520	TRUE	Empty	UDP-arabinose 4-epimerase 1 OS=Arabidopsis thaliana OX=3702 GN=MUR4 PE=1 SV=1	ARAE1_ARATH	MUR4	46 kDa		unknown	2
521	TRUE	Empty	Heat shock cognate 71 kDa protein OS=Bos taurus OX=9913 GN=HSPA8 PE=1 SV=2	HSP7C_BOVIN (+7)	HSPA8	71 kDa	TRUE	unknown	2
522	TRUE	Empty	Probable tocopherol cyclase, chloroplastic OS=Oryza sativa subsp. japonica OX=39947 GN=VTE1 PE=2 SV=1	TOCC_ORYSJ	VTE1	52 kDa		unknown	2
523	TRUE	Empty	Q9UK61-DECOY	Q9UK61-DECOY		?		unknown	2
524	TRUE	Empty	Methylmalonate-semialdehyde dehydrogenase [acylating], mitochondrial OS=Arabidopsis thaliana OX=3702 GN=ALDH6B2 PE=1 SV=2	MMSA_ARATH	ALDH6B2	66 kDa		unknown	2
525	TRUE	Empty	Chaperone protein DnaK OS=Staphylococcus saprophyticus subsp. saprophyticus (strain ATCC 15305 / DSM 20229) OX=342451 GN=dnaK PE=3 SV=1	DNAK_STAS1	dnaK	67 kDa		unknown	2
526	TRUE	Empty	30S ribosomal protein S11 OS=Ignicoccus hospitalis (strain KIN4/I / DSM 18386 / JCM 14125) OX=453591 GN=rps11 PE=3 SV=1	RS11_IGNH4	rps11	14 kDa		unknown	2
527	TRUE	Empty	Myosin-4 OS=Homo sapiens OX=9606 GN=MYH4 PE=2 SV=2	MYH4_HUMAN	MYH4	223 kDa		unknown	2
528	TRUE	Empty	11S globulin seed storage protein G3 OS=Helianthus annuus OX=4232 GN=HAG3 PE=3 SV=1	11S3_HELAN	HAG3	56 kDa		unknown	2
529	TRUE	Empty	Coatomer subunit beta'-2 OS=Oryza sativa subsp. japonica OX=39947 GN=Os02g0209100 PE=2 SV=1	COB22_ORYSJ	Os02g0209100	103 kDa	TRUE	unknown	2
530	TRUE	Empty	C0QZ84-DECOY	C0QZ84-DECOY		?		unknown	2
531	TRUE	Empty	Alpha-1,4 glucan phosphorylase L isozyme, chloroplastic/amyloplastic OS=Vicia faba OX=3906 GN=PHO1 PE=2 SV=2	PHSL_VICFA	PHO1	114 kDa	TRUE	unknown	2
532	TRUE	Empty	Dolichyl-diphosphooligosaccharide--protein glycosyltransferase subunit STT3B OS=Arabidopsis thaliana OX=3702 GN=STT3B PE=2 SV=1	STT3B_ARATH (+1)	STT3B	83 kDa		unknown	2
533	TRUE	Empty	Delta-1-pyrroline-5-carboxylate synthase 2 OS=Oryza sativa subsp. japonica OX=39947 GN=P5CS2 PE=2 SV=1	P5CS2_ORYSJ	P5CS2	80 kDa	TRUE	unknown	2
534	TRUE	Empty	ATP synthase subunit b 1 OS=Bartonella bacilliformis (strain ATCC 35685 / NCTC 12138 / KC583) OX=360095 GN=atpF1 PE=3 SV=1	ATPF1_BARBK	atpF1	18 kDa		unknown	2
535	TRUE	Empty	Villin-3 OS=Oryza sativa subsp. japonica OX=39947 GN=VLN3 PE=2 SV=2	VLN3_ORYSJ	VLN3	109 kDa		unknown	2
536	TRUE	Empty	Cysteine--tRNA ligase OS=Campylobacter hominis (strain ATCC BAA-381 / LMG 19568 / NCTC 13146 / CH001A) OX=360107 GN=cysS PE=3 SV=1	SYC_CAMHC	cysS	54 kDa		unknown	2
537	TRUE	Empty	E3 ubiquitin-protein ligase highwire OS=Drosophila melanogaster OX=7227 GN=hiw PE=1 SV=2	HIW_DROME	hiw	566 kDa		unknown	3
538	TRUE	Empty	Facilitated trehalose transporter Tret1 OS=Anopheles gambiae OX=7165 GN=Tret1 PE=1 SV=3	TRET1_ANOGA	Tret1	88 kDa		unknown	2
539	TRUE	Empty	tRNA(Ile)-lysidine synthase OS=Wolbachia sp. subsp. Brugia malayi (strain TRS) OX=292805 GN=tilS PE=3 SV=1	TILS_WOLTR	tilS	49 kDa		unknown	2
540	TRUE	Empty	Gamma-glutamyl phosphate reductase OS=Lachnoclostridium phytofermentans (strain ATCC 700394 / DSM 18823 / ISDg) OX=357809 GN=proA PE=3 SV=1	PROA_LACP7	proA	45 kDa		unknown	2
541	TRUE	Empty	Zinc finger protein 532 OS=Homo sapiens OX=9606 GN=ZNF532 PE=1 SV=2	ZN532_HUMAN	ZNF532	142 kDa		unknown	3
542	TRUE	Empty	Glycinin G1 OS=Glycine max OX=3847 GN=GY1 PE=1 SV=2	GLYG1_SOYBN	GY1	56 kDa		unknown	3
543	TRUE	Empty	Fructose-bisphosphate aldolase 1, cytoplasmic OS=Oryza sativa subsp. japonica OX=39947 GN=FBA1 PE=1 SV=2	ALFC1_ORYSJ	FBA1	39 kDa	TRUE	unknown	2
544	TRUE	Empty	Chaperone protein DnaK OS=Wolbachia pipientis subsp. Culex pipiens (strain wPip) OX=570417 GN=dnaK PE=3 SV=1	DNAK_WOLPP	dnaK	69 kDa	TRUE	unknown	2
545	TRUE	Empty	UDP-glucose 4-epimerase GEPI48 OS=Cyamopsis tetragonoloba OX=3832 PE=2 SV=1	GALE2_CYATE (+1)		38 kDa		unknown	2
546	TRUE	Empty	Vacuolar protein sorting-associated protein 26A OS=Arabidopsis thaliana OX=3702 GN=VPS26A PE=2 SV=1	VP26A_ARATH (+1)	VPS26A	35 kDa		unknown	2
547	TRUE	Empty	Myoglobin OS=Mus musculus OX=10090 GN=Mb PE=1 SV=3	MYG_MOUSE	Mb	17 kDa		unknown	3
548	TRUE	Empty	Threonine synthase 1, chloroplastic OS=Arabidopsis thaliana OX=3702 GN=TS1 PE=1 SV=1	THRC1_ARATH (+2)	TS1	58 kDa		unknown	2
549	TRUE	Empty	Ricin B-like lectin R40C1 OS=Oryza sativa subsp. japonica OX=39947 GN=R40C1 PE=1 SV=1	40C1_ORYSJ	R40C1	39 kDa	TRUE	unknown	2
550	TRUE	Empty	NADH dehydrogenase [ubiquinone] iron-sulfur protein 3 OS=Arabidopsis thaliana OX=3702 GN=NAD9 PE=1 SV=2	NDUS3_ARATH (+5)	NAD9	23 kDa	TRUE	unknown	3
551	TRUE	Empty	Hypersensitive-induced response protein-like protein 2 OS=Oryza sativa subsp. japonica OX=39947 GN=HIRL2 PE=3 SV=1	HIRL2_ORYSJ	HIRL2	32 kDa		unknown	2
552	TRUE	Empty	60S ribosomal protein L17-1 OS=Hordeum vulgare OX=4513 PE=2 SV=1	RL171_HORVU		20 kDa	TRUE	unknown	2
553	TRUE	Empty	Eukaryotic translation initiation factor 3 subunit I OS=Arabidopsis thaliana OX=3702 GN=TIF3I1 PE=2 SV=2	EIF3I_ARATH	TIF3I1	36 kDa		unknown	2
554	TRUE	Empty	Genome polyprotein OS=Zucchini yellow mosaic virus (strain Singapore) OX=117130 PE=3 SV=2	POLG_ZYMVS		351 kDa		unknown	3
555	TRUE	Empty	Probable phospholipid hydroperoxide glutathione peroxidase OS=Citrus sinensis OX=2711 GN=CSA PE=1 SV=1	GPX4_CITSI	CSA	19 kDa		unknown	2
556	TRUE	Empty	Beta-conglycinin alpha' subunit OS=Glycine max OX=3847 GN=CG-1 PE=1 SV=2	GLCAP_SOYBN	CG-1	72 kDa	TRUE	unknown	3
557	TRUE	Empty	Late embryogenesis abundant protein, group 3 OS=Triticum aestivum OX=4565 PE=2 SV=1	LEA3_WHEAT		23 kDa		unknown	2
558	TRUE	Empty	Probable protein phosphatase 2C 58 OS=Oryza sativa subsp. japonica OX=39947 GN=Os06g0651600 PE=2 SV=1	P2C58_ORYSJ	Os06g0651600	41 kDa		unknown	3
559	TRUE	Empty	COP9 signalosome complex subunit 5 OS=Oryza sativa subsp. japonica OX=39947 GN=CSN5 PE=1 SV=1	CSN5_ORYSJ	CSN5	40 kDa		unknown	3
560	TRUE	Empty	Multifunctional CCA protein OS=Shewanella sp. (strain MR-4) OX=60480 GN=cca PE=3 SV=1	CCA_SHESM	cca	47 kDa		unknown	2
561	TRUE	Empty	GTP-binding protein SAR1A OS=Arabidopsis thaliana OX=3702 GN=SAR1A PE=2 SV=1	SAR1A_ARATH (+1)	SAR1A	22 kDa	TRUE	unknown	2
562	TRUE	Empty	Chaperone protein DnaK OS=Rubrobacter xylanophilus (strain DSM 9941 / NBRC 16129) OX=266117 GN=dnaK PE=3 SV=1	DNAK_RUBXD	dnaK	69 kDa		unknown	2
563	TRUE	Empty	Probable ATP-dependent RNA helicase DHR1 OS=Saccharomyces cerevisiae (strain ATCC 204508 / S288c) OX=559292 GN=ECM16 PE=1 SV=1	DHR1_YEAST	ECM16	145 kDa		unknown	3
564	TRUE	Empty	Polyadenylate-binding protein OS=Drosophila melanogaster OX=7227 GN=pAbp PE=1 SV=3	PABP_DROME	pAbp	70 kDa		unknown	3
565	TRUE	Empty	50S ribosomal protein L11 OS=Clostridium acetobutylicum (strain ATCC 824 / DSM 792 / JCM 1419 / LMG 5710 / VKM B-1787) OX=272562 GN=rplK PE=3 SV=1	RL11_CLOAB (+1)	rplK	15 kDa		unknown	2
566	TRUE	Empty	GMP synthase [glutamine-hydrolyzing] OS=Parabacteroides distasonis (strain ATCC 8503 / DSM 20701 / CIP 104284 / JCM 5825 / NCTC 11152) OX=435591 GN=guaA PE=3 SV=1	GUAA_PARD8	guaA	56 kDa		unknown	2
567	TRUE	Empty	Glucose-1-phosphate adenylyltransferase small subunit 1, chloroplastic/amyloplastic OS=Oryza sativa subsp. japonica OX=39947 GN=AGPS1 PE=1 SV=1	GLGS1_ORYSJ	AGPS1	55 kDa	TRUE	unknown	2
568	TRUE	Empty	Isocitrate dehydrogenase [NAD] regulatory subunit 3, mitochondrial OS=Arabidopsis thaliana OX=3702 GN=IDH3 PE=1 SV=1	IDH3_ARATH	IDH3	40 kDa		unknown	2
569	TRUE	Empty	Phosphoglucomutase, cytoplasmic 2 OS=Zea mays OX=4577 PE=2 SV=2	PGMC2_MAIZE		63 kDa	TRUE	unknown	2
570	TRUE	Empty	P25357-DECOY	P25357-DECOY		?		unknown	2
571	TRUE	Empty	Gamma carbonic anhydrase 1, mitochondrial OS=Arabidopsis thaliana OX=3702 GN=GAMMACA1 PE=1 SV=1	GCA1_ARATH	GAMMACA1	30 kDa		unknown	2
572	TRUE	Empty	Chaperone protein DnaK OS=Buchnera aphidicola subsp. Baizongia pistaciae (strain Bp) OX=224915 GN=dnaK PE=3 SV=1	DNAK_BUCBP	dnaK	70 kDa		unknown	2
573	TRUE	Empty	Protein FAM184B OS=Homo sapiens OX=9606 GN=FAM184B PE=2 SV=3	F184B_HUMAN	FAM184B	121 kDa		unknown	2
574	TRUE	Empty	Chaperone protein DnaK OS=Vibrio harveyi OX=669 GN=dnaK PE=3 SV=1	DNAK_VIBHA	dnaK	69 kDa		unknown	2
575	TRUE	Empty	Chaperone protein DnaK OS=Mycoplasma gallisepticum (strain R(low / passage 15 / clone 2)) OX=710127 GN=dnaK PE=3 SV=2	DNAK_MYCGA	dnaK	64 kDa		unknown	2
576	TRUE	Empty	Adenylate kinase 4 OS=Oryza sativa subsp. japonica OX=39947 GN=ADK-B PE=2 SV=1	KAD4_ORYSJ	ADK-B	27 kDa		unknown	2
577	TRUE	Empty	Cytochrome c oxidase subunit 2 OS=Zea mays OX=4577 GN=COX2 PE=2 SV=4	COX2_MAIZE (+1)	COX2	30 kDa		unknown	2
578	TRUE	Empty	Polyubiquitin (Fragment) OS=Acetabularia peniculus OX=35862 PE=3 SV=2	UBIQP_ACEPE		47 kDa	TRUE	unknown	2
579	TRUE	Empty	Protein translocase subunit SecA OS=Neorickettsia sennetsu (strain ATCC VR-367 / Miyayama) OX=222891 GN=secA PE=3 SV=1	SECA_NEOSM	secA	92 kDa	TRUE	unknown	3
580	TRUE	Empty	Elongation factor Tu OS=Clavibacter michiganensis subsp. michiganensis (strain NCPPB 382) OX=443906 GN=tuf PE=3 SV=1	EFTU_CLAM3 (+2)	tuf	43 kDa		unknown	2
581	TRUE	Empty	Sucrose synthase 7 OS=Oryza sativa subsp. japonica OX=39947 GN=SUS7 PE=2 SV=2	SUS7_ORYSJ	SUS7	98 kDa	TRUE	unknown	2
582	TRUE	Empty	Threonine--tRNA ligase, cytoplasmic OS=Mus musculus OX=10090 GN=Tars PE=1 SV=2	SYTC_MOUSE (+1)	Tars	83 kDa		unknown	2
583	TRUE	Empty	Probable glutamate carboxypeptidase AMP1 OS=Arabidopsis thaliana OX=3702 GN=AMP1 PE=1 SV=3	GCP2_ARATH	AMP1	77 kDa		unknown	3
584	TRUE	Empty	Vascular endothelial growth factor receptor 3 OS=Danio rerio OX=7955 GN=flt4 PE=2 SV=1	VGFR3_DANRE	flt4	153 kDa		unknown	2
585	TRUE	Empty	Cell adhesion molecule-related/down-regulated by oncogenes OS=Rattus norvegicus OX=10116 GN=Cdon PE=1 SV=2	CDON_RAT	Cdon	136 kDa		unknown	2
586	TRUE	Empty	Proton pump-interactor BIP131 OS=Oryza sativa subsp. japonica OX=39947 GN=BIP131 PE=1 SV=1	BP131_ORYSJ	BIP131	69 kDa		unknown	2
587	TRUE	Empty	Probable UDP-arabinopyranose mutase 2 OS=Solanum tuberosum OX=4113 GN=UPTG2 PE=1 SV=1	RGP2_SOLTU	UPTG2	42 kDa	TRUE	unknown	2
588	TRUE	Empty	Putative D-cysteine desulfhydrase 1, mitochondrial OS=Oryza sativa subsp. japonica OX=39947 GN=Os02g0773300 PE=2 SV=2	DCYD1_ORYSJ	Os02g0773300	45 kDa		unknown	2
589	TRUE	Empty	Acetyl-CoA acetyltransferase, cytosolic 1 OS=Arabidopsis thaliana OX=3702 GN=AAT1 PE=1 SV=1	THIC1_ARATH	AAT1	41 kDa		unknown	2
590	TRUE	Empty	Xylanolytic transcriptional activator xlnR homolog OS=Magnaporthe oryzae (strain 70-15 / ATCC MYA-4617 / FGSC 8958) OX=242507 GN=xlr1 PE=3 SV=1	XLNR_MAGO7	xlr1	109 kDa		unknown	2
591	TRUE	Empty	Proteasome subunit alpha type-5-A OS=Arabidopsis thaliana OX=3702 GN=PAE1 PE=1 SV=1	PSA5A_ARATH (+1)	PAE1	26 kDa	TRUE	unknown	2
592	TRUE	Empty	ATP synthase subunit alpha 2 OS=Shewanella frigidimarina (strain NCIMB 400) OX=318167 GN=atpA2 PE=3 SV=1	ATPA2_SHEFN	atpA2	55 kDa	TRUE	unknown	2
593	TRUE	Empty	ATP-citrate synthase subunit alpha chain protein 1 OS=Oryza sativa subsp. japonica OX=39947 GN=ACLA-1 PE=3 SV=2	ACLA1_ORYSJ (+2)	ACLA-1	45 kDa		unknown	2
594	TRUE	Empty	Highly reducing polyketide synthase 19 OS=Magnaporthe oryzae (strain 70-15 / ATCC MYA-4617 / FGSC 8958) OX=242507 GN=PKS19 PE=2 SV=1	PKS19_MAGO7	PKS19	272 kDa		unknown	2
595	TRUE	Empty	Transcription elongation factor SPT6 homolog OS=Arabidopsis thaliana OX=3702 GN=SPT6 PE=1 SV=1	SPT61_ARATH	SPT6	185 kDa		unknown	2
596	TRUE	Empty	Ankyrin-2 OS=Mus musculus OX=10090 GN=Ank2 PE=1 SV=2	ANK2_MOUSE	Ank2	426 kDa		unknown	2
597	TRUE	Empty	Protein bassoon OS=Mus musculus OX=10090 GN=Bsn PE=1 SV=4	BSN_MOUSE	Bsn	419 kDa		unknown	2
598	TRUE	Empty	Formate dehydrogenase, mitochondrial OS=Solanum tuberosum OX=4113 GN=FDH1 PE=1 SV=2	FDH_SOLTU	FDH1	42 kDa	TRUE	unknown	2
599	TRUE	Empty	Pup--protein ligase OS=Sanguibacter keddieii (strain ATCC 51767 / DSM 10542 / NCFB 3025 / ST-74) OX=446469 GN=pafA PE=3 SV=1	PAFA_SANKS	pafA	51 kDa		unknown	2
600	TRUE	Empty	Bifunctional enolase 2/transcriptional activator OS=Arabidopsis thaliana OX=3702 GN=ENO2 PE=1 SV=1	ENO2_ARATH	ENO2	48 kDa	TRUE	unknown	2
601	TRUE	Empty	Chaperone protein ClpB 1 OS=Nostoc sp. (strain PCC 7120 / SAG 25.82 / UTEX 2576) OX=103690 GN=clpB1 PE=3 SV=1	CLPB1_NOSS1	clpB1	99 kDa	TRUE	unknown	2
602	TRUE	Empty	Heat shock protein SSA2 OS=Saccharomyces cerevisiae (strain ATCC 204508 / S288c) OX=559292 GN=SSA2 PE=1 SV=3	HSP72_YEAST	SSA2	69 kDa	TRUE	unknown	2
603	TRUE	Empty	DEAD-box ATP-dependent RNA helicase 38 OS=Oryza sativa subsp. japonica OX=39947 GN=Os03g0158200 PE=3 SV=1	RH38_ORYSJ	Os03g0158200	56 kDa		unknown	2
604	TRUE	Empty	Myosin regulatory light chain 2, skeletal muscle isoform OS=Bos taurus OX=9913 GN=MYLPF PE=2 SV=1	MLRS_BOVIN (+5)	MYLPF	19 kDa		unknown	2
605	TRUE	Empty	26S proteasome non-ATPase regulatory subunit 7 homolog A OS=Arabidopsis thaliana OX=3702 GN=RPN8A PE=1 SV=1	PSD7A_ARATH	RPN8A	35 kDa		unknown	2
606	TRUE	Empty	Chorismate synthase OS=Korarchaeum cryptofilum (strain OPF8) OX=374847 GN=aroC PE=3 SV=1	AROC_KORCO	aroC	39 kDa		unknown	2
607	TRUE	Empty	3'(2'),5'-bisphosphate nucleotidase OS=Oryza sativa OX=4530 PE=2 SV=1	DPNP_ORYSA (+1)		37 kDa		unknown	2
608	TRUE	Empty	Threonine--tRNA ligase, mitochondrial 1 OS=Arabidopsis thaliana OX=3702 GN=THRRS PE=1 SV=3	SYTM1_ARATH	THRRS	81 kDa		unknown	2
609	TRUE	Empty	Glutamate synthase 1 [NADH], chloroplastic OS=Oryza sativa subsp. japonica OX=39947 GN=Os01g0681900 PE=2 SV=1	GLT1_ORYSJ	Os01g0681900	237 kDa		unknown	2
610	TRUE	Empty	Protein translocase subunit SecA 1 OS=Nitrobacter hamburgensis (strain DSM 10229 / NCIMB 13809 / X14) OX=323097 GN=secA1 PE=3 SV=1	SECA1_NITHX	secA1	107 kDa	TRUE	unknown	2
611	TRUE	Empty	Genome polyprotein OS=Bovine viral diarrhea virus (strain CP7) OX=268305 PE=1 SV=1	POLG_BVDVC		439 kDa		unknown	2
612	TRUE	Empty	Glutamine synthetase PR-1 OS=Phaseolus vulgaris OX=3885 PE=2 SV=1	GLNA1_PHAVU		39 kDa		unknown	2
613	TRUE	Empty	Protein translocase subunit SecA OS=Rhodobacter capsulatus OX=1061 GN=secA PE=1 SV=1	SECA_RHOCA	secA	101 kDa	TRUE	unknown	2
614	TRUE	Empty	3-isopropylmalate dehydrogenase, chloroplastic OS=Solanum tuberosum OX=4113 PE=2 SV=1	LEU3_SOLTU		40 kDa		unknown	2
615	TRUE	Empty	Farnesyl pyrophosphate synthase 2 OS=Arabidopsis thaliana OX=3702 GN=FPS2 PE=2 SV=1	FPPS2_ARATH (+2)	FPS2	40 kDa		unknown	2
616	TRUE	Empty	Histone-lysine N-methyltransferase SETD2 OS=Mus musculus OX=10090 GN=Setd2 PE=1 SV=1	SETD2_MOUSE	Setd2	286 kDa		unknown	2
617	TRUE	Empty	Glutamate--tRNA ligase, cytoplasmic OS=Arabidopsis thaliana OX=3702 GN=At5g26710 PE=1 SV=1	SYEC_ARATH	At5g26710	81 kDa		unknown	2
618	TRUE	Empty	Phosphoenolpyruvate carboxylase OS=Medicago sativa OX=3879 GN=PEPC PE=2 SV=1	CAPP_MEDSA	PEPC	111 kDa	TRUE	unknown	2
619	TRUE	Empty	Chaperonin CPN60-2, mitochondrial OS=Zea mays OX=4577 GN=CPN60II PE=2 SV=1	CH62_MAIZE	CPN60II	61 kDa	TRUE	unknown	2
620	TRUE	Empty	Centrosomal protein of 152 kDa OS=Homo sapiens OX=9606 GN=CEP152 PE=1 SV=4	CE152_HUMAN	CEP152	196 kDa		unknown	2
621	TRUE	Empty	Uracil phosphoribosyltransferase OS=Geobacter sulfurreducens (strain ATCC 51573 / DSM 12127 / PCA) OX=243231 GN=upp PE=3 SV=1	UPP_GEOSL	upp	23 kDa		unknown	2
END OF FILE
