# Supplementary material for: Detection of gluten peptides in human duodenal fluids with immuno-liquid chromatography-mass spectrometry
Source: Royal Society of Chemistry journal article supplement (doi:10.1039/d4ay00852a), 2024-01-01
Supplement: d4ay00852a2.xlsx [file d4ay00852a2.xlsx]

## Sheet: SI_IDs_Sample_A
Sample A (3 LC-MS/MS replicates), Samples report created on 11/29/2022
Experiment: DDA Extra6 Pool
	Peak List Generator: unknown
		Version: unknown
		Charge States Calculated: unknown
		Deisotoped: unknown
		Textual Annotation: unknown
	Database Set: 1 Database
		Database Name: the SP2019_05_All_20190520 database
			Version: unknown
			Taxonomy: All Entries
			Number of Proteins: 560118
		Does database contain common contaminants?: unknown
	Search Engine Set: 1 Search Engine
		Search Engine: Mascot
			Version: 2.6.1
			Samples: All Samples
			Fragment Tolerance: 0.80 Da (Monoisotopic)
			Parent Tolerance: 5.0 PPM (Monoisotopic)
			Fixed Modifications:
			Variable Modifications: +1 on NQ (Deamidated), +16 on M (Oxidation)
			Database: the SP2019_05_All_20190520 database (unknown version, 560118 entries)
			Digestion Enzyme: Non specific
			Max Missed Cleavages: 0
			Probability Model:
				Mudpit_2020 5:09:03 PM;File Size: 936441719 [Byte] (F087620): LFDR Model, Classifier data: Bayes, Good (50%) IonScore - IdentityScore m:13.7/s:11.4 Ion Score m:NA Identity Score m:NA Homology Score m:NA Delta Ion Score m:NA, Bad (50%) IonScore - IdentityScore m:-7.98/s:3.61 Ion Score m:NA Identity Score m:NA Homology Score m:NA Delta Ion Score m:NA [all charge states]
	Scaffold: Version: Scaffold_5.0.0
		Modification Metadata Set: 2334 modifications
			Source: C:\Program Files\Scaffold 4\parameters\unimod.xml
			Comment:
		Protein Grouping Strategy: Experiment-wide grouping with binary peptide-protein weights
		Peptide Thresholds: 95.0 % minimum
		Protein Thresholds: 99.9 % minimum and 1 peptide minimum
		Peptide FDR: 18.7 % (Decoy)
		Protein FDR: 43.1 % (Decoy)
		GO Annotation Source(s):
		Pathway Annotation Source(s): Unknown
		Alternate ID Source(s): FASTA:UniProt/Swiss-Prot (UniProtKB)
									Exclusive Unique Peptide Count
Sample A									Uncategorized Sample
#	Visible?	Starred?	Identified Proteins (332)	Accession Number	Alternate ID	Molecular Weight	Protein Grouping Ambiguity	Taxonomy	Sample A
1	TRUE	Empty	Beta-casein OS=Bos taurus OX=9913 GN=CSN2 PE=1 SV=2	CASB_BOVIN	CSN2	25 kDa		unknown	73
2	TRUE	Empty	Alpha-S1-casein OS=Bos taurus OX=9913 GN=CSN1S1 PE=1 SV=2	CASA1_BOVIN	CSN1S1	25 kDa	TRUE	unknown	34
3	TRUE	Empty	Beta-lactoglobulin OS=Bos taurus OX=9913 GN=LGB PE=1 SV=3	LACB_BOVIN (+1)	LGB	20 kDa	TRUE	unknown	38
4	TRUE	Empty	Kappa-casein OS=Bos taurus OX=9913 GN=CSN3 PE=1 SV=1	CASK_BOVIN	CSN3	21 kDa		unknown	21
5	TRUE	Empty	Alpha-S2-casein OS=Bos taurus OX=9913 GN=CSN1S2 PE=1 SV=2	CASA2_BOVIN	CSN1S2	26 kDa		unknown	15
6	TRUE	Empty	Epsin OS=Dictyostelium discoideum OX=44689 GN=epnA PE=3 SV=1	EPN_DICDI	epnA	76 kDa		unknown	58
7	TRUE	Empty	Hemoglobin subunit alpha OS=Homo sapiens OX=9606 GN=HBA1 PE=1 SV=2	HBA_HUMAN (+2)	HBA1	15 kDa	TRUE	unknown	5
8	TRUE	Empty	Alpha-amylase 1 OS=Homo sapiens OX=9606 GN=AMY1A PE=1 SV=2	AMY1_HUMAN	AMY1A	58 kDa		unknown	2
9	TRUE	Empty	Xanthine dehydrogenase/oxidase OS=Bos taurus OX=9913 GN=XDH PE=1 SV=4	XDH_BOVIN	XDH	147 kDa		unknown	5
10	TRUE	Empty	Hemoglobin subunit beta OS=Homo sapiens OX=9606 GN=HBB PE=1 SV=2	HBB_HUMAN (+2)	HBB	16 kDa	TRUE	unknown	5
11	TRUE	Empty	Polymeric immunoglobulin receptor OS=Bos taurus OX=9913 GN=PIGR PE=2 SV=1	PIGR_BOVIN	PIGR	82 kDa		unknown	3
12	TRUE	Empty	Alpha/beta-gliadin A-I OS=Triticum aestivum OX=4565 PE=2 SV=1	GDA1_WHEAT		30 kDa	TRUE	unknown	5
13	TRUE	Empty	Putative uncharacterized protein DDB_G0286901 OS=Dictyostelium discoideum OX=44689 GN=DDB_G0286901 PE=4 SV=1	Y8866_DICDI	DDB_G0286901	81 kDa		unknown	24
14	TRUE	Empty	Lactotransferrin OS=Bos taurus OX=9913 GN=LTF PE=1 SV=2	TRFL_BOVIN	LTF	78 kDa		unknown	2
15	TRUE	Empty	Protein PF14_0175 OS=Plasmodium falciparum (isolate 3D7) OX=36329 GN=PF14_0175 PE=1 SV=1	YPF17_PLAF7	PF14_0175	549 kDa	TRUE	unknown	16
16	TRUE	Empty	Cleavage stimulation factor subunit 2 tau variant OS=Mus musculus OX=10090 GN=Cstf2t PE=1 SV=2	CSTFT_MOUSE	Cstf2t	66 kDa		unknown	11
17	TRUE	Empty	Glycosylation-dependent cell adhesion molecule 1 OS=Bos taurus OX=9913 GN=GLYCAM1 PE=1 SV=2	GLCM1_BOVIN	GLYCAM1	17 kDa		unknown	4
18	TRUE	Empty	AP-1 complex subunit gamma OS=Dictyostelium discoideum OX=44689 GN=ap1g1 PE=1 SV=1	AP1G_DICDI	ap1g1	100 kDa		unknown	14
19	TRUE	Empty	Uncharacterized protein MAL13P1.336 OS=Plasmodium falciparum (isolate 3D7) OX=36329 GN=MAL13P1.336 PE=1 SV=1	Y13P2_PLAF7	MAL13P1	79 kDa	TRUE	unknown	11
20	TRUE	Empty	Uncharacterized protein R727 OS=Acanthamoeba polyphaga mimivirus OX=212035 GN=MIMI_R727 PE=1 SV=1	YR727_MIMIV	MIMI_R727	32 kDa		unknown	7
21	TRUE	Empty	Pre-mRNA polyadenylation factor FIP1 OS=Gibberella zeae (strain PH-1 / ATCC MYA-4620 / FGSC 9075 / NRRL 31084) OX=229533 GN=FIP1 PE=3 SV=2	FIP1_GIBZE	FIP1	35 kDa		unknown	15
22	TRUE	Empty	Basic salivary proline-rich protein 2 OS=Homo sapiens OX=9606 GN=PRB2 PE=1 SV=3	PRB2_HUMAN	PRB2	41 kDa		unknown	4
23	TRUE	Empty	Mediator of RNA polymerase II transcription subunit 12 OS=Caenorhabditis briggsae OX=6238 GN=dpy-22 PE=3 SV=2	MED12_CAEBR	dpy-22	446 kDa		unknown	1
24	TRUE	Empty	Salivary acidic proline-rich phosphoprotein 1/2 OS=Homo sapiens OX=9606 GN=PRH1 PE=1 SV=2	PRPC_HUMAN	PRH1	17 kDa		unknown	1
25	TRUE	Empty	FK506-binding protein 5 OS=Dictyostelium discoideum OX=44689 GN=fkbp5 PE=1 SV=1	FKBP5_DICDI	fkbp5	182 kDa		unknown	11
26	TRUE	Empty	Beta-amylase OS=Hordeum vulgare OX=4513 GN=BMY1 PE=1 SV=1	AMYB_HORVU	BMY1	60 kDa	TRUE	unknown	3
27	TRUE	Empty	Clathrin interactor EPSIN 2 OS=Arabidopsis thaliana OX=3702 GN=EPSIN2 PE=1 SV=1	EPN2_ARATH	EPSIN2	95 kDa		unknown	9
28	TRUE	Empty	Uncharacterized protein L357 OS=Acanthamoeba polyphaga mimivirus OX=212035 GN=MIMI_L357 PE=4 SV=1	YL357_MIMIV	MIMI_L357	57 kDa		unknown	8
29	TRUE	Empty	Mediator of RNA polymerase II transcription subunit 15 OS=Aedes aegypti OX=7159 GN=MED15 PE=3 SV=1	MED15_AEDAE	MED15	82 kDa		unknown	9
30	TRUE	Empty	Mediator of RNA polymerase II transcription subunit 30 OS=Drosophila melanogaster OX=7227 GN=MED30 PE=1 SV=1	MED30_DROME	MED30	35 kDa		unknown	4
31	TRUE	Empty	Mediator of RNA polymerase II transcription subunit 3 OS=Candida glabrata (strain ATCC 2001 / CBS 138 / JCM 3761 / NBRC 0622 / NRRL Y-65) OX=284593 GN=PGD1 PE=3 SV=1	MED3_CANGA	PGD1	52 kDa		unknown	10
32	TRUE	Empty	AP2/ERF domain-containing protein PFD0985w OS=Plasmodium falciparum (isolate 3D7) OX=36329 GN=PFD0985w PE=1 SV=2	AP2A_PLAF7	PFD0985w	400 kDa		unknown	7
33	TRUE	Empty	Neurogenic protein mastermind OS=Drosophila melanogaster OX=7227 GN=mam PE=2 SV=2	MAM_DROME	mam	167 kDa		unknown	6
34	TRUE	Empty	Glutenin, high molecular weight subunit DY10 OS=Triticum aestivum OX=4565 GN=GLU-D1-2B PE=3 SV=1	GLT0_WHEAT	GLU-D1-2B	70 kDa		unknown	1
35	TRUE	Empty	Probable serine/threonine-protein kinase DDB_G0282963 OS=Dictyostelium discoideum OX=44689 GN=DDB_G0282963 PE=3 SV=1	Y9844_DICDI	DDB_G0282963	195 kDa		unknown	3
36	TRUE	Empty	General transcriptional corepressor trfA OS=Dictyostelium discoideum OX=44689 GN=trfA PE=2 SV=1	CYC8_DICDI	trfA	160 kDa	TRUE	unknown	9
37	TRUE	Empty	Lipocalin-1 OS=Homo sapiens OX=9606 GN=LCN1 PE=1 SV=1	LCN1_HUMAN	LCN1	19 kDa		unknown	3
38	TRUE	Empty	Mediator of RNA polymerase II transcription subunit 30 OS=Drosophila pseudoobscura pseudoobscura OX=46245 GN=MED30 PE=3 SV=2	MED30_DROPS	MED30	36 kDa		unknown	4
39	TRUE	Empty	Mediator of RNA polymerase II transcription subunit 15 OS=Drosophila melanogaster OX=7227 GN=MED15 PE=2 SV=1	MED15_DROME	MED15	81 kDa		unknown	2
40	TRUE	Empty	Alpha/beta-gliadin A-IV OS=Triticum aestivum OX=4565 PE=2 SV=1	GDA4_WHEAT		34 kDa	TRUE	unknown	2
41	TRUE	Empty	Asparagine-rich protein (Fragment) OS=Plasmodium falciparum OX=5833 PE=2 SV=2	ARP_PLAFA		63 kDa	TRUE	unknown	5
42	TRUE	Empty	Alpha-S1-casein OS=Bubalus bubalis OX=89462 GN=CSN1S1 PE=2 SV=2	CASA1_BUBBU	CSN1S1	24 kDa	TRUE	unknown	3
43	TRUE	Empty	Forkhead box protein A1-A OS=Xenopus laevis OX=8355 GN=foxa1-a PE=2 SV=2	FXA1A_XENLA	foxa1-a	47 kDa		unknown	4
44	TRUE	Empty	Alpha/beta-gliadin OS=Triticum aestivum OX=4565 PE=2 SV=2	GDA0_WHEAT		33 kDa	TRUE	unknown	1
45	TRUE	Empty	60 kDa heat shock protein homolog 1, mitochondrial OS=Drosophila melanogaster OX=7227 GN=Hsp60B PE=2 SV=1	CH60B_DROME	Hsp60B	69 kDa		unknown	3
46	TRUE	Empty	Alpha/beta-gliadin A-II OS=Triticum aestivum OX=4565 PE=2 SV=1	GDA2_WHEAT		34 kDa	TRUE	unknown	3
47	TRUE	Empty	Gamma-gliadin OS=Triticum aestivum OX=4565 PE=3 SV=1	GDBX_WHEAT		34 kDa		unknown	3
48	TRUE	Empty	Putative histone-lysine N-methyltransferase 1 OS=Plasmodium falciparum (isolate 3D7) OX=36329 GN=SET1 PE=1 SV=1	SET1_PLAF7	SET1	796 kDa	TRUE	unknown	8
49	TRUE	Empty	Mediator of RNA polymerase II transcription subunit 15 OS=Anopheles gambiae OX=7165 GN=MED15 PE=3 SV=3	MED15_ANOGA	MED15	78 kDa		unknown	1
50	TRUE	Empty	Neuromedin-S OS=Bombina maxima OX=161274 GN=nms PE=1 SV=1	NMS_BOMMX	nms	17 kDa		unknown	2
51	TRUE	Empty	Protein cbp-1 OS=Caenorhabditis elegans OX=6239 GN=cbp-1 PE=1 SV=6	CBP1_CAEEL	cbp-1	222 kDa		unknown	1
52	TRUE	Empty	A6UZV3-DECOY	A6UZV3-DECOY		?		unknown	3
53	TRUE	Empty	Mediator of RNA polymerase II transcription subunit 12 OS=Drosophila melanogaster OX=7227 GN=kto PE=1 SV=2	MED12_DROME	kto	279 kDa		unknown	5
54	TRUE	Empty	Protein suppressor of sable OS=Drosophila melanogaster OX=7227 GN=su(sable) PE=1 SV=2	SUS_DROME	su	144 kDa		unknown	3
55	TRUE	Empty	Serum albumin OS=Homo sapiens OX=9606 GN=ALB PE=1 SV=2	ALBU_HUMAN	ALB	69 kDa	TRUE	unknown	2
56	TRUE	Empty	Glutenin, high molecular weight subunit DX5 OS=Triticum aestivum OX=4565 GN=GLU-1D-1D PE=3 SV=5	GLT5_WHEAT	GLU-1D-1D	90 kDa		unknown	1
57	TRUE	Empty	Pre-mRNA polyadenylation factor fip-1 OS=Neurospora crassa (strain ATCC 24698 / 74-OR23-1A / CBS 708.71 / DSM 1257 / FGSC 987) OX=367110 GN=fip-1 PE=3 SV=1	FIP1_NEUCR	fip-1	42 kDa		unknown	6
58	TRUE	Empty	Eukaryotic translation initiation factor 4 gamma OS=Dictyostelium discoideum OX=44689 GN=eif4g PE=3 SV=1	IF4G_DICDI	eif4g	155 kDa		unknown	3
59	TRUE	Empty	Nuclear receptor coactivator 2 OS=Danio rerio OX=7955 GN=ncoa2 PE=1 SV=1	NCOA2_DANRE	ncoa2	162 kDa		unknown	8
60	TRUE	Empty	Alpha/beta-gliadin A-III OS=Triticum aestivum OX=4565 PE=2 SV=1	GDA3_WHEAT		32 kDa	TRUE	unknown	2
61	TRUE	Empty	Keratin, type II cytoskeletal I (Fragment) OS=Xenopus laevis OX=8355 PE=2 SV=1	K2C2_XENLA		45 kDa		unknown	5
62	TRUE	Empty	Putative mediator of RNA polymerase II transcription subunit 19 OS=Dictyostelium discoideum OX=44689 GN=med19 PE=3 SV=1	MED19_DICDI	med19	34 kDa		unknown	6
63	TRUE	Empty	Serum response factor homolog B OS=Dictyostelium discoideum OX=44689 GN=srfB PE=3 SV=1	SRFB_DICDI	srfB	51 kDa		unknown	1
64	TRUE	Empty	Catalase OS=Vibrio cholerae serotype O1 (strain ATCC 39315 / El Tor Inaba N16961) OX=243277 GN=VC_1585 PE=3 SV=2	CATA_VIBCH	VC_1585	57 kDa		unknown	4
65	TRUE	Empty	Copper transport protein ctr4 OS=Schizosaccharomyces pombe (strain 972 / ATCC 24843) OX=284812 GN=ctr4 PE=1 SV=1	CTR4_SCHPO	ctr4	32 kDa		unknown	6
66	TRUE	Empty	Histone acetyltransferase p300 OS=Homo sapiens OX=9606 GN=EP300 PE=1 SV=2	EP300_HUMAN	EP300	264 kDa		unknown	5
67	TRUE	Empty	Mediator of RNA polymerase II transcription subunit 12 OS=Caenorhabditis elegans OX=6239 GN=dpy-22 PE=1 SV=2	MED12_CAEEL	dpy-22	401 kDa		unknown	3
68	TRUE	Empty	Signal recognition particle subunit SRP54 OS=Saccharomyces cerevisiae (strain ATCC 204508 / S288c) OX=559292 GN=SRP54 PE=1 SV=2	SRP54_YEAST	SRP54	60 kDa		unknown	5
69	TRUE	Empty	Q5FR00-DECOY	Q5FR00-DECOY		?		unknown	2
70	TRUE	Empty	Circumsporozoite protein OS=Plasmodium cynomolgi (strain Ceylon) OX=5829 PE=3 SV=1	CSP_PLACC		38 kDa		unknown	1
71	TRUE	Empty	Protein dopey homolog PFC0245c OS=Plasmodium falciparum (isolate 3D7) OX=36329 GN=PFC0245c PE=1 SV=1	DOP1_PLAF7	PFC0245c	468 kDa		unknown	4
72	TRUE	Empty	Putative uncharacterized protein DDB_G0291608 OS=Dictyostelium discoideum OX=44689 GN=DDB_G0291608 PE=4 SV=1	Y1586_DICDI	DDB_G0291608	104 kDa		unknown	3
73	TRUE	Empty	Uncharacterized protein Os08g0359500 OS=Oryza sativa subsp. japonica OX=39947 GN=Os08g0359500 PE=2 SV=1	Y8359_ORYSJ	Os08g0359500	23 kDa	TRUE	unknown	6
74	TRUE	Empty	Putative uncharacterized protein DDB_G0293878 OS=Dictyostelium discoideum OX=44689 GN=DDB_G0293878 PE=4 SV=1	Y2175_DICDI	DDB_G0293878	160 kDa		unknown	2
75	TRUE	Empty	Clustered-asparagine-rich protein OS=Plasmodium falciparum OX=5833 PE=4 SV=2	ARP2_PLAFA		51 kDa		unknown	5
76	TRUE	Empty	Clathrin interactor EPSIN 3 OS=Arabidopsis thaliana OX=3702 GN=EPSIN3 PE=2 SV=1	EPN3_ARATH	EPSIN3	110 kDa		unknown	3
77	TRUE	Empty	Pre-mRNA polyadenylation factor FIP1 OS=Debaryomyces hansenii (strain ATCC 36239 / CBS 767 / JCM 1990 / NBRC 0083 / IGC 2968) OX=284592 GN=FIP1 PE=3 SV=2	FIP1_DEBHA	FIP1	36 kDa		unknown	5
78	TRUE	Empty	N66 matrix protein OS=Pinctada maxima OX=104660 PE=1 SV=1	MA66_PINMA		62 kDa		unknown	3
79	TRUE	Empty	MATH and LRR domain-containing protein PFE0570w OS=Plasmodium falciparum (isolate 3D7) OX=36329 GN=PFE0570w PE=1 SV=1	MLRR1_PLAF7	PFE0570w	1188 kDa	TRUE	unknown	4
80	TRUE	Empty	Q03YC9-DECOY	Q03YC9-DECOY		?		unknown	3
81	TRUE	Empty	Q68XL6-DECOY	Q68XL6-DECOY		?		unknown	4
82	TRUE	Empty	RGS domain-containing serine/threonine-protein kinase A OS=Dictyostelium discoideum OX=44689 GN=rckA PE=1 SV=1	RCKA_DICDI	rckA	125 kDa	TRUE	unknown	4
83	TRUE	Empty	Signal recognition particle 54 kDa protein homolog OS=Yarrowia lipolytica (strain CLIB 122 / E 150) OX=284591 GN=SRP54 PE=3 SV=2	SRP54_YARLI	SRP54	57 kDa		unknown	4
84	TRUE	Empty	Mitochondrial import inner membrane translocase subunit TIM17-2 OS=Arabidopsis thaliana OX=3702 GN=TIM17-2 PE=1 SV=2	TI172_ARATH	TIM17-2	26 kDa		unknown	3
85	TRUE	Empty	Uncharacterized protein YdjI OS=Bacillus subtilis (strain 168) OX=224308 GN=ydjI PE=4 SV=1	YDJI_BACSU	ydjI	36 kDa		unknown	4
86	TRUE	Empty	Uncharacterized protein YER158C OS=Saccharomyces cerevisiae (strain ATCC 204508 / S288c) OX=559292 GN=YER158C PE=1 SV=1	YEY8_YEAST	YER158C	64 kDa		unknown	5
87	TRUE	Empty	Actin cytoskeleton-regulatory complex protein SLA1 OS=Ustilago maydis (strain 521 / FGSC 9021) OX=237631 GN=SLA1 PE=3 SV=1	SLA1_USTMA	SLA1	129 kDa		unknown	2
88	TRUE	Empty	Hybrid signal transduction histidine kinase G OS=Dictyostelium discoideum OX=44689 GN=dhkG PE=3 SV=1	DHKG_DICDI	dhkG	383 kDa		unknown	2
89	TRUE	Empty	Mediator of RNA polymerase II transcription subunit 15 OS=Caenorhabditis briggsae OX=6238 GN=mdt-15 PE=3 SV=1	MED15_CAEBR	mdt-15	83 kDa		unknown	2
90	TRUE	Empty	Zymogen granule protein 16 homolog B OS=Homo sapiens OX=9606 GN=ZG16B PE=1 SV=3	ZG16B_HUMAN	ZG16B	23 kDa		unknown	2
91	TRUE	Empty	Nuclear receptor coactivator 3 OS=Homo sapiens OX=9606 GN=NCOA3 PE=1 SV=1	NCOA3_HUMAN	NCOA3	155 kDa		unknown	1
92	TRUE	Empty	Nuclear receptor coactivator 2 OS=Homo sapiens OX=9606 GN=NCOA2 PE=1 SV=2	NCOA2_HUMAN	NCOA2	159 kDa		unknown	1
93	TRUE	Empty	Immunoglobulin gamma-1 heavy chain OS=Homo sapiens OX=9606 PE=1 SV=2	IGG1_HUMAN (+3)		49 kDa		unknown	1
94	TRUE	Empty	A4TRC9-DECOY	A4TRC9-DECOY (+6)		?		unknown	3
95	TRUE	Empty	A7HM57-DECOY	A7HM57-DECOY		?		unknown	5
96	TRUE	Empty	O35764-DECOY	O35764-DECOY		?		unknown	4
97	TRUE	Empty	P34651-DECOY	P34651-DECOY		?		unknown	2
98	TRUE	Empty	Q39IW3-DECOY	Q39IW3-DECOY		?		unknown	5
99	TRUE	Empty	Q5WY82-DECOY	Q5WY82-DECOY		?		unknown	5
100	TRUE	Empty	Q7EYV7-DECOY	Q7EYV7-DECOY		?		unknown	3
101	TRUE	Empty	Sex-lethal homolog OS=Megaselia scalaris OX=36166 GN=SXL PE=2 SV=3	SXL_MEGSC	SXL	36 kDa		unknown	5
102	TRUE	Empty	Uncharacterized membrane protein DDB_G0293934 OS=Dictyostelium discoideum OX=44689 GN=DDB_G0293934 PE=4 SV=1	Y3934_DICDI	DDB_G0293934	189 kDa		unknown	3
103	TRUE	Empty	Putative uncharacterized protein DDB_G0282133 OS=Dictyostelium discoideum OX=44689 GN=DDB_G0282133 PE=4 SV=2	Y8359_DICDI	DDB_G0282133	331 kDa		unknown	3
104	TRUE	Empty	Histone acetyltransferase p300 OS=Mus musculus OX=10090 GN=Ep300 PE=1 SV=2	EP300_MOUSE	Ep300	263 kDa		unknown	2
105	TRUE	Empty	Sucrose transport protein SUC5 OS=Arabidopsis thaliana OX=3702 GN=SUC5 PE=1 SV=1	SUC5_ARATH	SUC5	55 kDa		unknown	2
106	TRUE	Empty	Circumsporozoite protein OS=Plasmodium cynomolgi (strain Mulligan/NIH) OX=5832 PE=3 SV=3	CSP_PLACM		39 kDa		unknown	1
107	TRUE	Empty	Putative mediator of RNA polymerase II transcription subunit 26 OS=Dictyostelium discoideum OX=44689 GN=med26 PE=3 SV=2	MED26_DICDI	med26	236 kDa		unknown	1
108	TRUE	Empty	F4KCC2-DECOY	F4KCC2-DECOY		?		unknown	1
109	TRUE	Empty	Mediator of RNA polymerase II transcription subunit 13 OS=Caenorhabditis briggsae OX=6238 GN=let-19 PE=3 SV=2	MED13_CAEBR	let-19	338 kDa		unknown	1
110	TRUE	Empty	B8DDY8-DECOY	B8DDY8-DECOY		?		unknown	4
111	TRUE	Empty	Probable serine/threonine-protein kinase clkA OS=Dictyostelium discoideum OX=44689 GN=clkA PE=3 SV=1	CLKA_DICDI	clkA	107 kDa		unknown	3
112	TRUE	Empty	CAR1 transcription factor OS=Dictyostelium discoideum OX=44689 GN=CRTF PE=2 SV=1	CRTF_DICDI	CRTF	98 kDa		unknown	3
113	TRUE	Empty	Clathrin interactor 1 OS=Mus musculus OX=10090 GN=Clint1 PE=1 SV=2	EPN4_MOUSE	Clint1	69 kDa		unknown	3
114	TRUE	Empty	Spore coat assembly protein ExsA OS=Bacillus cereus OX=1396 GN=exsA PE=2 SV=1	EXSA_BACCE	exsA	73 kDa		unknown	3
115	TRUE	Empty	Pre-mRNA polyadenylation factor fip1 OS=Emericella nidulans (strain FGSC A4 / ATCC 38163 / CBS 112.46 / NRRL 194 / M139) OX=227321 GN=fip1 PE=3 SV=2	FIP1_EMENI	fip1	35 kDa		unknown	3
116	TRUE	Empty	Negative growth regulatory protein NGR1 OS=Saccharomyces cerevisiae (strain ATCC 204508 / S288c) OX=559292 GN=NGR1 PE=1 SV=2	NGR1_YEAST	NGR1	75 kDa		unknown	3
117	TRUE	Empty	O00311-DECOY	O00311-DECOY		?		unknown	3
118	TRUE	Empty	Q9P2E8-DECOY	Q9P2E8-DECOY		?		unknown	3
119	TRUE	Empty	Homeobox protein Wariai OS=Dictyostelium discoideum OX=44689 GN=warA PE=2 SV=1	WARA_DICDI	warA	89 kDa		unknown	3
120	TRUE	Empty	Uncharacterized protein DDB_G0290685 OS=Dictyostelium discoideum OX=44689 GN=DDB_G0290685 PE=2 SV=2	Y0266_DICDI	DDB_G0290685	117 kDa		unknown	4
121	TRUE	Empty	Uncharacterized protein DDB_G0283357 OS=Dictyostelium discoideum OX=44689 GN=DDB_G0283357 PE=4 SV=1	Y5465_DICDI	DDB_G0283357	138 kDa		unknown	5
122	TRUE	Empty	Q7Z7M0-DECOY	Q7Z7M0-DECOY		?		unknown	2
123	TRUE	Empty	Clathrin interactor 1 OS=Bos taurus OX=9913 GN=CLINT1 PE=2 SV=1	EPN4_BOVIN	CLINT1	71 kDa		unknown	2
124	TRUE	Empty	60 kDa chaperonin 1 OS=Prochlorococcus marinus subsp. pastoris (strain CCMP1986 / NIES-2087 / MED4) OX=59919 GN=groL1 PE=3 SV=1	CH601_PROMP	groL1	61 kDa		unknown	2
125	TRUE	Empty	Uncharacterized transmembrane protein DDB_G0289901 OS=Dictyostelium discoideum OX=44689 GN=DDB_G0289901 PE=3 SV=1	Y8625_DICDI	DDB_G0289901	102 kDa		unknown	2
126	TRUE	Empty	Bromodomain and WD repeat-containing DDB_G0285837 OS=Dictyostelium discoideum OX=44689 GN=DDB_G0285837 PE=4 SV=1	Y5837_DICDI	DDB_G0285837	250 kDa		unknown	2
127	TRUE	Empty	P0C6X5-DECOY	P0C6X5-DECOY		?		unknown	2
128	TRUE	Empty	Methionine-rich nacre protein OS=Pinctada maxima OX=104660 PE=1 SV=1	MRNP_PINMA		29 kDa		unknown	2
129	TRUE	Empty	Transcription initiation factor TFIID subunit 1 OS=Dictyostelium discoideum OX=44689 GN=taf1 PE=3 SV=1	TAF1_DICDI	taf1	260 kDa		unknown	2
130	TRUE	Empty	RNA-binding protein PIN4 OS=Saccharomyces cerevisiae (strain ATCC 204508 / S288c) OX=559292 GN=PIN4 PE=1 SV=1	PIN4_YEAST	PIN4	74 kDa		unknown	2
131	TRUE	Empty	Transcription factor SPT20 homolog OS=Dictyostelium discoideum OX=44689 GN=DDB_G0280065 PE=3 SV=1	SPT20_DICDI	DDB_G0280065	163 kDa		unknown	2
132	TRUE	Empty	Immunoglobulin kappa light chain OS=Homo sapiens OX=9606 PE=1 SV=1	IGK_HUMAN		23 kDa		unknown	2
133	TRUE	Empty	Hyphally regulated cell wall protein 3 OS=Candida albicans (strain SC5314 / ATCC MYA-2876) OX=237561 GN=HYR3 PE=1 SV=1	HYR3_CANAL	HYR3	123 kDa		unknown	1
134	TRUE	Empty	Pre-mRNA polyadenylation factor FIP1 OS=Kluyveromyces lactis (strain ATCC 8585 / CBS 2359 / DSM 70799 / NBRC 1267 / NRRL Y-1140 / WM37) OX=284590 GN=FIP1 PE=3 SV=1	FIP1_KLULA	FIP1	33 kDa	TRUE	unknown	1
135	TRUE	Empty	Prion-like-(Q/N-rich) domain-bearing protein 25 OS=Caenorhabditis elegans OX=6239 GN=pqn-25 PE=4 SV=3	PQN25_CAEEL	pqn-25	71 kDa		unknown	1
136	TRUE	Empty	10 kDa prolamin OS=Oryza sativa subsp. indica OX=39946 GN=OsI_013205 PE=2 SV=2	PROA_ORYSI (+1)	OsI_013205	15 kDa		unknown	1
137	TRUE	Empty	Hemoglobin subunit delta OS=Gorilla gorilla gorilla OX=9595 GN=HBD PE=1 SV=2	HBD_GORGO (+4)	HBD	16 kDa	TRUE	unknown	1
138	TRUE	Empty	Mediator of RNA polymerase II transcription subunit 1 OS=Aedes aegypti OX=7159 GN=AAEL007402 PE=3 SV=1	MED1_AEDAE	AAEL007402	182 kDa		unknown	1
139	TRUE	Empty	Protein suppressor 2 of zeste OS=Drosophila melanogaster OX=7227 GN=Su(z)2 PE=2 SV=2	SUZ2_DROME	Su	146 kDa		unknown	1
140	TRUE	Empty	Q9I7U4-DECOY	Q9I7U4-DECOY		?		unknown	1
141	TRUE	Empty	Glucose-repressible alcohol dehydrogenase transcriptional effector OS=Saccharomyces cerevisiae (strain ATCC 204508 / S288c) OX=559292 GN=CCR4 PE=1 SV=2	CCR4_YEAST	CCR4	95 kDa		unknown	4
142	TRUE	Empty	Hybrid signal transduction histidine kinase M OS=Dictyostelium discoideum OX=44689 GN=dhkM PE=3 SV=1	DHKM_DICDI	dhkM	265 kDa		unknown	3
143	TRUE	Empty	Hepatocyte nuclear factor 3-beta OS=Mus musculus OX=10090 GN=Foxa2 PE=1 SV=2	FOXA2_MOUSE	Foxa2	48 kDa		unknown	3
144	TRUE	Empty	GATA zinc finger domain-containing protein 16 OS=Dictyostelium discoideum OX=44689 GN=gtaP PE=4 SV=1	GTAP_DICDI	gtaP	76 kDa		unknown	3
145	TRUE	Empty	Lactadherin OS=Bos taurus OX=9913 GN=MFGE8 PE=1 SV=2	MFGM_BOVIN	MFGE8	47 kDa		unknown	3
146	TRUE	Empty	P23393-DECOY	P23393-DECOY		?		unknown	3
147	TRUE	Empty	Nuclear and cytoplasmic polyadenylated RNA-binding protein PUB1 OS=Saccharomyces cerevisiae (strain ATCC 204508 / S288c) OX=559292 GN=PUB1 PE=1 SV=4	PUB1_YEAST	PUB1	51 kDa		unknown	4
148	TRUE	Empty	Q9V3D4-DECOY	Q9V3D4-DECOY		?		unknown	3
149	TRUE	Empty	Probable serine/threonine-protein kinase vps15 OS=Dictyostelium discoideum OX=44689 GN=vps15 PE=3 SV=1	VPS15_DICDI	vps15	217 kDa		unknown	3
150	TRUE	Empty	Blue copper oxidase CueO OS=Salmonella typhi OX=90370 GN=cueO PE=3 SV=1	CUEO_SALTI (+1)	cueO	59 kDa		unknown	2
151	TRUE	Empty	Hepatocyte nuclear factor 3-beta OS=Homo sapiens OX=9606 GN=FOXA2 PE=1 SV=1	FOXA2_HUMAN	FOXA2	48 kDa	TRUE	unknown	2
152	TRUE	Empty	Serpin-Z1A OS=Triticum aestivum OX=4565 GN=WZCI PE=1 SV=1	SPZ1A_WHEAT	WZCI	43 kDa		unknown	2
153	TRUE	Empty	Putative uncharacterized protein DDB_G0282281 OS=Dictyostelium discoideum OX=44689 GN=DDB_G0282281 PE=4 SV=1	Y5312_DICDI	DDB_G0282281	19 kDa		unknown	2
154	TRUE	Empty	Feruloyl esterase B OS=Piromyces equi OX=99929 GN=ESTA PE=2 SV=1	FAEB_PIREQ	ESTA	56 kDa		unknown	2
155	TRUE	Empty	Putative E3 ubiquitin-protein ligase protein PFF1365c OS=Plasmodium falciparum (isolate 3D7) OX=36329 GN=PFF1365c PE=1 SV=1	ALTH1_PLAF7	PFF1365c	1206 kDa		unknown	2
156	TRUE	Empty	Heavy metal-associated isoprenylated plant protein 34 OS=Arabidopsis thaliana OX=3702 GN=HIPP34 PE=2 SV=1	HIP34_ARATH	HIPP34	59 kDa		unknown	2
157	TRUE	Empty	Procalin OS=Triatoma protracta OX=72493 PE=1 SV=2	PRCLN_TRIPT		19 kDa		unknown	2
158	TRUE	Empty	Co-chaperone protein p23-1 OS=Arabidopsis thaliana OX=3702 GN=P23-1 PE=1 SV=1	P23A_ARATH	P23-1	25 kDa		unknown	2
159	TRUE	Empty	Hepatocyte nuclear factor 3-alpha OS=Rattus norvegicus OX=10116 GN=Foxa1 PE=1 SV=1	FOXA1_RAT	Foxa1	49 kDa		unknown	2
160	TRUE	Empty	Serum albumin OS=Bos taurus OX=9913 GN=ALB PE=1 SV=4	ALBU_BOVIN	ALB	69 kDa	TRUE	unknown	2
161	TRUE	Empty	Glucose-repressible alcohol dehydrogenase transcriptional effector OS=Candida glabrata (strain ATCC 2001 / CBS 138 / JCM 3761 / NBRC 0622 / NRRL Y-65) OX=284593 GN=CCR4 PE=3 SV=1	CCR4_CANGA	CCR4	99 kDa		unknown	2
162	TRUE	Empty	Putative uncharacterized protein DDB_G0285119 OS=Dictyostelium discoideum OX=44689 GN=DDB_G0285119 PE=3 SV=1	Y6352_DICDI	DDB_G0285119	57 kDa		unknown	2
163	TRUE	Empty	B3 domain-containing transcription factor ABI3 OS=Arabidopsis thaliana OX=3702 GN=ABI3 PE=1 SV=1	ABI3_ARATH	ABI3	80 kDa		unknown	2
164	TRUE	Empty	B-cell CLL/lymphoma 9-like protein OS=Homo sapiens OX=9606 GN=BCL9L PE=1 SV=1	BCL9L_HUMAN	BCL9L	157 kDa		unknown	2
165	TRUE	Empty	Two-component response regulator-like APRR7 OS=Arabidopsis thaliana OX=3702 GN=APRR7 PE=1 SV=1	APRR7_ARATH	APRR7	80 kDa		unknown	2
166	TRUE	Empty	Type-2 histone deacetylase 2 OS=Dictyostelium discoideum OX=44689 GN=hdaC PE=2 SV=1	HDA22_DICDI	hdaC	191 kDa		unknown	2
167	TRUE	Empty	Mediator of RNA polymerase II transcription subunit 25 OS=Arabidopsis thaliana OX=3702 GN=MED25 PE=1 SV=1	MED25_ARATH	MED25	90 kDa		unknown	2
168	TRUE	Empty	Replication protein A 70 kDa DNA-binding subunit D OS=Arabidopsis thaliana OX=3702 GN=RPA1D PE=2 SV=1	RFA1D_ARATH	RPA1D	70 kDa		unknown	2
169	TRUE	Empty	Mediator of RNA polymerase II transcription subunit 15 OS=Caenorhabditis elegans OX=6239 GN=mdt-15 PE=1 SV=3	MED15_CAEEL	mdt-15	85 kDa		unknown	1
170	TRUE	Empty	Keratin, type II cytoskeletal I (Fragment) OS=Xenopus laevis OX=8355 PE=2 SV=1	K2C1_XENLA		46 kDa		unknown	1
171	TRUE	Empty	Insoluble matrix shell protein 4 (Fragment) OS=Ruditapes philippinarum OX=129788 PE=1 SV=1	IMSP4_RUDPH		33 kDa		unknown	1
172	TRUE	Empty	Heavy metal-associated isoprenylated plant protein 33 OS=Arabidopsis thaliana OX=3702 GN=HIPP33 PE=2 SV=1	HIP33_ARATH	HIPP33	60 kDa		unknown	1
173	TRUE	Empty	Putative proline-rich receptor-like protein kinase PERK6 OS=Arabidopsis thaliana OX=3702 GN=PERK6 PE=2 SV=2	PERK6_ARATH	PERK6	75 kDa		unknown	1
174	TRUE	Empty	Transcription activator of gluconeogenesis SNOG_12336 OS=Phaeosphaeria nodorum (strain SN15 / ATCC MYA-4574 / FGSC 10173) OX=321614 GN=SNOG_12336 PE=3 SV=2	ACUK_PHANO	SNOG_12336	76 kDa		unknown	1
175	TRUE	Empty	Translation initiation factor IF-2 OS=Lactobacillus helveticus (strain DPC 4571) OX=405566 GN=infB PE=3 SV=1	IF2_LACH4	infB	97 kDa		unknown	1
176	TRUE	Empty	Circumsporozoite protein OS=Plasmodium cynomolgi (strain Gombak) OX=5830 PE=3 SV=1	CSP_PLACG		37 kDa		unknown	1
177	TRUE	Empty	Hyphally regulated cell wall protein 1 OS=Candida albicans (strain SC5314 / ATCC MYA-2876) OX=237561 GN=HYR1 PE=1 SV=2	HYR1_CANAL	HYR1	92 kDa		unknown	1
178	TRUE	Empty	Putative protein DDB_G0292252 OS=Dictyostelium discoideum OX=44689 GN=DDB_G0292252 PE=4 SV=1	Y9625_DICDI	DDB_G0292252	142 kDa		unknown	1
179	TRUE	Empty	B2FR00-DECOY	B2FR00-DECOY		?		unknown	3
180	TRUE	Empty	Liprin-alpha OS=Caenorhabditis elegans OX=6239 GN=syd-2 PE=1 SV=1	LIPA_CAEEL	syd-2	130 kDa		unknown	3
181	TRUE	Empty	Nuclear transcription factor Y subunit alpha OS=Dictyostelium discoideum OX=44689 GN=nfyA PE=3 SV=1	NFYA_DICDI	nfyA	57 kDa		unknown	3
182	TRUE	Empty	O06975-DECOY	O06975-DECOY		?		unknown	3
183	TRUE	Empty	Q5UP68-DECOY	Q5UP68-DECOY		?		unknown	3
184	TRUE	Empty	Q54CU4-DECOY	Q54CU4-DECOY		?		unknown	2
185	TRUE	Empty	Q7L190-DECOY	Q7L190-DECOY		?		unknown	2
186	TRUE	Empty	Q941R6-DECOY	Q941R6-DECOY		?		unknown	2
187	TRUE	Empty	F8VPN2-DECOY	F8VPN2-DECOY (+1)		?		unknown	2
188	TRUE	Empty	Q2N9U6-DECOY	Q2N9U6-DECOY		?		unknown	2
189	TRUE	Empty	Q60307-DECOY	Q60307-DECOY		?		unknown	2
190	TRUE	Empty	RNA-binding protein FUS OS=Mus musculus OX=10090 GN=Fus PE=1 SV=1	FUS_MOUSE	Fus	53 kDa		unknown	2
191	TRUE	Empty	E9Q6J5-DECOY	E9Q6J5-DECOY		?		unknown	2
192	TRUE	Empty	Protein SON OS=Homo sapiens OX=9606 GN=SON PE=1 SV=4	SON_HUMAN	SON	264 kDa		unknown	2
193	TRUE	Empty	Methionine-rich protein OS=Lottia gigantea OX=225164 PE=1 SV=1	MRP_LOTGI		29 kDa		unknown	2
194	TRUE	Empty	Probable serine/threonine-protein kinase mkcE OS=Dictyostelium discoideum OX=44689 GN=mkcE PE=3 SV=1	MKCE_DICDI	mkcE	79 kDa		unknown	2
195	TRUE	Empty	Q9L6S1-DECOY	Q9L6S1-DECOY		?		unknown	2
196	TRUE	Empty	O09167-DECOY	O09167-DECOY		?		unknown	2
197	TRUE	Empty	P0C6W2-DECOY	P0C6W2-DECOY		?		unknown	2
198	TRUE	Empty	Perilipin-2 OS=Homo sapiens OX=9606 GN=PLIN2 PE=1 SV=2	PLIN2_HUMAN (+1)	PLIN2	48 kDa		unknown	2
199	TRUE	Empty	Protein transport protein SEC31 OS=Dictyostelium discoideum OX=44689 GN=sec31 PE=3 SV=1	SEC31_DICDI	sec31	150 kDa		unknown	2
200	TRUE	Empty	Myb-like protein H OS=Dictyostelium discoideum OX=44689 GN=mybH PE=3 SV=1	MYBH_DICDI	mybH	137 kDa		unknown	2
201	TRUE	Empty	Homeobox protein 12 OS=Dictyostelium discoideum OX=44689 GN=hbx12 PE=3 SV=1	HBX12_DICDI	hbx12	97 kDa		unknown	2
202	TRUE	Empty	Optomotor-blind protein OS=Drosophila melanogaster OX=7227 GN=bi PE=1 SV=3	OMB_DROME	bi	103 kDa		unknown	2
203	TRUE	Empty	Q8BVR6-DECOY	Q8BVR6-DECOY		?		unknown	2
204	TRUE	Empty	Transcription factor mef2A OS=Dictyostelium discoideum OX=44689 GN=mef2A PE=2 SV=2	SRFC_DICDI	mef2A	117 kDa		unknown	2
205	TRUE	Empty	P32324-DECOY	P32324-DECOY		?		unknown	2
206	TRUE	Empty	PE-PGRS family protein PE_PGRS16 OS=Mycobacterium tuberculosis (strain ATCC 25618 / H37Rv) OX=83332 GN=PE_PGRS16 PE=1 SV=1	PG16_MYCTU	PE_PGRS16	82 kDa		unknown	2
207	TRUE	Empty	Putative uncharacterized protein DDB_G0288537 OS=Dictyostelium discoideum OX=44689 GN=DDB_G0288537 PE=4 SV=1	Y7983_DICDI	DDB_G0288537	95 kDa	TRUE	unknown	2
208	TRUE	Empty	A9WQ90-DECOY	A9WQ90-DECOY		?		unknown	2
209	TRUE	Empty	Beta-amylase OS=Zea mays OX=4577 GN=BMY1 PE=2 SV=1	AMYB_MAIZE	BMY1	55 kDa	TRUE	unknown	2
210	TRUE	Empty	B3-hordein (Fragment) OS=Hordeum vulgare OX=4513 PE=1 SV=1	HOR3_HORVU		30 kDa	TRUE	unknown	2
211	TRUE	Empty	Q6DV79-DECOY	Q6DV79-DECOY		?		unknown	2
212	TRUE	Empty	WD repeat-containing protein DDB_G0292056 OS=Dictyostelium discoideum OX=44689 GN=DDB_G0292056 PE=4 SV=1	Y2056_DICDI	DDB_G0292056	203 kDa	TRUE	unknown	2
213	TRUE	Empty	Histone-lysine N-methyltransferase 2D OS=Homo sapiens OX=9606 GN=KMT2D PE=1 SV=2	KMT2D_HUMAN	KMT2D	593 kDa		unknown	2
214	TRUE	Empty	Uncharacterized protein PFD1115c OS=Plasmodium falciparum (isolate 3D7) OX=36329 GN=PFD1115c PE=1 SV=1	YD115_PLAF7	PFD1115c	191 kDa	TRUE	unknown	1
215	TRUE	Empty	B8EPU6-DECOY	B8EPU6-DECOY		?		unknown	1
216	TRUE	Empty	Transcription factor RLM1 OS=Saccharomyces cerevisiae (strain ATCC 204508 / S288c) OX=559292 GN=RLM1 PE=1 SV=1	RLM1_YEAST	RLM1	73 kDa		unknown	1
217	TRUE	Empty	A2BKJ8-DECOY	A2BKJ8-DECOY		?		unknown	1
218	TRUE	Empty	Protein CAF40 OS=Saccharomyces cerevisiae (strain ATCC 204508 / S288c) OX=559292 GN=CAF40 PE=1 SV=1	CAF40_YEAST	CAF40	41 kDa		unknown	1
219	TRUE	Empty	Cyclin-dependent kinase 8 OS=Caenorhabditis briggsae OX=6238 GN=cdk-8 PE=3 SV=2	CDK8_CAEBR	cdk-8	71 kDa		unknown	1
220	TRUE	Empty	Protein raptor homolog OS=Dictyostelium discoideum OX=44689 GN=raptor PE=1 SV=1	RPTOR_DICDI	raptor	168 kDa		unknown	1
221	TRUE	Empty	B1H2Q6-DECOY	B1H2Q6-DECOY		?		unknown	1
222	TRUE	Empty	Mediator of RNA polymerase II transcription subunit 12 OS=Homo sapiens OX=9606 GN=MED12 PE=1 SV=4	MED12_HUMAN (+2)	MED12	243 kDa		unknown	1
223	TRUE	Empty	A9UUB8-DECOY	A9UUB8-DECOY		?		unknown	1
224	TRUE	Empty	Q8KCD6-DECOY	Q8KCD6-DECOY		?		unknown	1
225	TRUE	Empty	Merozoite surface antigen 2 OS=Plasmodium falciparum (isolate Nig32 / Nigeria) OX=70150 GN=MSA2 PE=2 SV=1	MSA2_PLAF2	MSA2	34 kDa		unknown	1
226	TRUE	Empty	Probable serine/threonine-protein kinase MARK-A OS=Dictyostelium discoideum OX=44689 GN=mrkA PE=3 SV=1	MRKA_DICDI	mrkA	120 kDa		unknown	1
227	TRUE	Empty	ETS-like protein pointed OS=Drosophila melanogaster OX=7227 GN=pnt PE=1 SV=2	PNT_DROME	pnt	78 kDa		unknown	1
228	TRUE	Empty	Forkhead box protein A2 OS=Danio rerio OX=7955 GN=foxa2 PE=2 SV=1	FOXA2_DANRE	foxa2	45 kDa		unknown	1
229	TRUE	Empty	Putative vacuolar protein sorting-associated protein 13B OS=Dictyostelium discoideum OX=44689 GN=vps13B PE=3 SV=1	VP13B_DICDI	vps13B	694 kDa		unknown	1
230	TRUE	Empty	Probable inactive serine/threonine-protein kinase DDB_G0280131 OS=Dictyostelium discoideum OX=44689 GN=DDB_G0280131 PE=3 SV=1	Y0038_DICDI	DDB_G0280131	132 kDa		unknown	1
231	TRUE	Empty	Q895M3-DECOY	Q895M3-DECOY		?		unknown	1
232	TRUE	Empty	Mediator of RNA polymerase II transcription subunit 15 OS=Saccharomyces cerevisiae (strain ATCC 204508 / S288c) OX=559292 GN=GAL11 PE=1 SV=3	MED15_YEAST	GAL11	120 kDa		unknown	1
233	TRUE	Empty	Dermokine OS=Mus musculus OX=10090 GN=Dmkn PE=2 SV=2	DMKN_MOUSE	Dmkn	52 kDa		unknown	1
234	TRUE	Empty	Serine/threonine-protein kinase DDB_G0283821 OS=Dictyostelium discoideum OX=44689 GN=DDB_G0283821 PE=3 SV=1	Y9877_DICDI	DDB_G0283821	104 kDa		unknown	1
235	TRUE	Empty	Glucose starvation modulator protein 1 OS=Lodderomyces elongisporus (strain ATCC 11503 / CBS 2605 / JCM 1781 / NBRC 1676 / NRRL YB-4239) OX=379508 GN=GSM1 PE=3 SV=1	GSM1_LODEL	GSM1	78 kDa		unknown	1
236	TRUE	Empty	A0A1P8AUY4-DECOY	A0A1P8AUY4-DECOY		?		unknown	1
237	TRUE	Empty	Protein transport protein SEC9 OS=Yarrowia lipolytica (strain CLIB 122 / E 150) OX=284591 GN=SEC9 PE=3 SV=1	SEC9_YARLI	SEC9	67 kDa		unknown	1
238	TRUE	Empty	Co-chaperone protein daf-41 OS=Caenorhabditis elegans OX=6239 GN=daf-41 PE=2 SV=1	DAF41_CAEEL	daf-41	19 kDa		unknown	1
239	TRUE	Empty	Q5BA83-DECOY	Q5BA83-DECOY		?		unknown	1
240	TRUE	Empty	A3CP56-DECOY	A3CP56-DECOY		?		unknown	2
241	TRUE	Empty	A6WHM7-DECOY	A6WHM7-DECOY		?		unknown	2
242	TRUE	Empty	A8EWU8-DECOY	A8EWU8-DECOY		?		unknown	2
243	TRUE	Empty	B1J5F7-DECOY	B1J5F7-DECOY		?		unknown	2
244	TRUE	Empty	B4ETX3-DECOY	B4ETX3-DECOY (+1)		?		unknown	2
245	TRUE	Empty	C4L574-DECOY	C4L574-DECOY		?		unknown	2
246	TRUE	Empty	Basic-leucine zipper transcription factor B OS=Dictyostelium discoideum OX=44689 GN=dimB PE=1 SV=1	DIMB_DICDI	dimB	68 kDa		unknown	2
247	TRUE	Empty	Glycerol uptake/efflux facilitator protein OS=Saccharomyces cerevisiae (strain ATCC 204508 / S288c) OX=559292 GN=FPS1 PE=1 SV=2	FPS1_YEAST	FPS1	74 kDa		unknown	2
248	TRUE	Empty	Cell wall protein IFF6 OS=Candida albicans (strain SC5314 / ATCC MYA-2876) OX=237561 GN=IFF6 PE=1 SV=2	IFF6_CANAL	IFF6	105 kDa		unknown	2
249	TRUE	Empty	K3VDP2-DECOY	K3VDP2-DECOY		?		unknown	2
250	TRUE	Empty	Keratin-associated protein 10-5 OS=Homo sapiens OX=9606 GN=KRTAP10-5 PE=1 SV=2	KR105_HUMAN	KRTAP10-5	28 kDa		unknown	2
251	TRUE	Empty	Keratin-associated protein 4-7 OS=Homo sapiens OX=9606 GN=KRTAP4-7 PE=1 SV=2	KRA47_HUMAN	KRTAP4-7	23 kDa		unknown	2
252	TRUE	Empty	Gastric triacylglycerol lipase OS=Mus musculus OX=10090 GN=Lipf PE=2 SV=1	LIPG_MOUSE	Lipf	45 kDa		unknown	2
253	TRUE	Empty	Mediator of RNA polymerase II transcription subunit 11 OS=Drosophila melanogaster OX=7227 GN=MED11 PE=1 SV=1	MED11_DROME	MED11	20 kDa		unknown	2
254	TRUE	Empty	Mediator of RNA polymerase II transcription subunit 29 OS=Drosophila virilis OX=7244 GN=ix PE=2 SV=1	MED29_DROVI	ix	23 kDa		unknown	2
255	TRUE	Empty	Myeloid leukemia factor 2 OS=Homo sapiens OX=9606 GN=MLF2 PE=1 SV=1	MLF2_HUMAN	MLF2	28 kDa		unknown	2
256	TRUE	Empty	Probable serine/threonine-protein kinase mps1 OS=Dictyostelium discoideum OX=44689 GN=mps1 PE=3 SV=1	MPS1_DICDI	mps1	114 kDa		unknown	2
257	TRUE	Empty	O08562-DECOY	O08562-DECOY		?		unknown	2
258	TRUE	Empty	O56861-DECOY	O56861-DECOY		?		unknown	2
259	TRUE	Empty	O88279-DECOY	O88279-DECOY		?		unknown	2
260	TRUE	Empty	P22119-DECOY	P22119-DECOY		?		unknown	2
261	TRUE	Empty	P38945-DECOY	P38945-DECOY		?		unknown	2
262	TRUE	Empty	P45985-DECOY	P45985-DECOY		?		unknown	2
263	TRUE	Empty	Penicillin-binding protein 1A OS=Clostridium acetobutylicum (strain ATCC 824 / DSM 792 / JCM 1419 / LMG 5710 / VKM B-1787) OX=272562 GN=pbpA PE=3 SV=1	PBPA_CLOAB	pbpA	89 kDa		unknown	2
264	TRUE	Empty	Q076A4-DECOY	Q076A4-DECOY		?		unknown	2
265	TRUE	Empty	Q185S9-DECOY	Q185S9-DECOY		?		unknown	2
266	TRUE	Empty	Q2JKV7-DECOY	Q2JKV7-DECOY		?		unknown	2
267	TRUE	Empty	Q37972-DECOY	Q37972-DECOY		?		unknown	2
268	TRUE	Empty	Q478A2-DECOY	Q478A2-DECOY		?		unknown	2
269	TRUE	Empty	Q60343-DECOY	Q60343-DECOY		?		unknown	2
270	TRUE	Empty	Q865F5-DECOY	Q865F5-DECOY		?		unknown	2
271	TRUE	Empty	Q8DFE6-DECOY	Q8DFE6-DECOY		?		unknown	2
272	TRUE	Empty	Q8I7I5-DECOY	Q8I7I5-DECOY		?		unknown	2
273	TRUE	Empty	Q8QGX4-DECOY	Q8QGX4-DECOY		?		unknown	2
274	TRUE	Empty	Q9C0Z4-DECOY	Q9C0Z4-DECOY		?		unknown	2
275	TRUE	Empty	Q9LZ23-DECOY	Q9LZ23-DECOY		?		unknown	2
276	TRUE	Empty	Probable inactive serine/threonine-protein kinase scy2 OS=Dictyostelium discoideum OX=44689 GN=scy2 PE=3 SV=1	SCY2_DICDI	scy2	125 kDa		unknown	2
277	TRUE	Empty	Protein TonB OS=Haemophilus influenzae (strain ATCC 51907 / DSM 11121 / KW20 / Rd) OX=71421 GN=tonB PE=3 SV=1	TONB_HAEIN	tonB	29 kDa		unknown	2
278	TRUE	Empty	White collar 1 protein OS=Neurospora crassa (strain ATCC 24698 / 74-OR23-1A / CBS 708.71 / DSM 1257 / FGSC 987) OX=367110 GN=wc-1 PE=1 SV=2	WC1_NEUCR	wc-1	127 kDa		unknown	2
279	TRUE	Empty	Nonribosomal peptide synthetase lcsA OS=Purpureocillium lilacinum OX=33203 GN=lcsA PE=2 SV=1	LCSA_PURLI	lcsA	1295 kDa		unknown	2
280	TRUE	Empty	Probable serine/threonine-protein kinase DDB_G0267686 OS=Dictyostelium discoideum OX=44689 GN=DDB_G0267686 PE=3 SV=1	Y9847_DICDI	DDB_G0267686	246 kDa		unknown	1
281	TRUE	Empty	A8J6X7-DECOY	A8J6X7-DECOY		?		unknown	1
282	TRUE	Empty	Q8NNT5-DECOY	Q8NNT5-DECOY		?		unknown	1
283	TRUE	Empty	B9JVP4-DECOY	B9JVP4-DECOY		?		unknown	1
284	TRUE	Empty	Q8BQ47-DECOY	Q8BQ47-DECOY		?		unknown	1
285	TRUE	Empty	Q8CJF7-DECOY	Q8CJF7-DECOY		?		unknown	1
286	TRUE	Empty	Q91ZB0-DECOY	Q91ZB0-DECOY		?		unknown	1
287	TRUE	Empty	Selenoprotein P OS=Mus musculus OX=10090 GN=Selenop PE=1 SV=3	SEPP1_MOUSE	Selenop	43 kDa		unknown	1
288	TRUE	Empty	Alpha-lactalbumin OS=Bos mutus grunniens OX=30521 GN=LALBA PE=2 SV=1	LALBA_BOSMU (+1)	LALBA	16 kDa		unknown	1
289	TRUE	Empty	A5U2R1-DECOY	A5U2R1-DECOY (+1)		?		unknown	1
290	TRUE	Empty	Q9UP52-DECOY	Q9UP52-DECOY		?		unknown	1
291	TRUE	Empty	SUN domain-containing protein 2 OS=Dictyostelium discoideum OX=44689 GN=sun2 PE=3 SV=1	SUN2_DICDI	sun2	146 kDa		unknown	1
292	TRUE	Empty	Q0AGR1-DECOY	Q0AGR1-DECOY		?		unknown	1
293	TRUE	Empty	Auxin response factor 19 OS=Oryza sativa subsp. japonica OX=39947 GN=ARF19 PE=2 SV=2	ARFS_ORYSJ	ARF19	128 kDa		unknown	1
294	TRUE	Empty	Protein SSXT OS=Homo sapiens OX=9606 GN=SS18 PE=1 SV=3	SSXT_HUMAN	SS18	46 kDa		unknown	1
295	TRUE	Empty	Q6BLS5-DECOY	Q6BLS5-DECOY		?		unknown	1
296	TRUE	Empty	Q9PAE7-DECOY	Q9PAE7-DECOY		?		unknown	1
297	TRUE	Empty	Q09470-DECOY	Q09470-DECOY		?		unknown	1
298	TRUE	Empty	Circumsporozoite protein OS=Plasmodium cynomolgi (strain London) OX=5831 PE=3 SV=1	CSP_PLACL		37 kDa		unknown	1
299	TRUE	Empty	Putative uncharacterized protein DDB_G0279653 OS=Dictyostelium discoideum OX=44689 GN=DDB_G0279653 PE=4 SV=1	Y5961_DICDI	DDB_G0279653	87 kDa	TRUE	unknown	1
300	TRUE	Empty	A2RD66-DECOY	A2RD66-DECOY (+8)		?		unknown	1
301	TRUE	Empty	Q87LW4-DECOY	Q87LW4-DECOY		?		unknown	1
302	TRUE	Empty	Q9N0D0-DECOY	Q9N0D0-DECOY		?		unknown	1
303	TRUE	Empty	Negative regulator of PDR1-mediated fluconazole resistance JJJ1 OS=Candida glabrata (strain ATCC 2001 / CBS 138 / JCM 3761 / NBRC 0622 / NRRL Y-65) OX=284593 GN=JJJ1 PE=4 SV=1	JJJ1_CANGA	JJJ1	73 kDa		unknown	1
304	TRUE	Empty	A5ELN7-DECOY	A5ELN7-DECOY (+2)		?		unknown	1
305	TRUE	Empty	B8GUQ6-DECOY	B8GUQ6-DECOY		?		unknown	1
306	TRUE	Empty	Uncharacterized protein DDB_G0292186 OS=Dictyostelium discoideum OX=44689 GN=DDB_G0292186 PE=4 SV=1	Y9218_DICDI	DDB_G0292186	126 kDa		unknown	1
307	TRUE	Empty	O43043-DECOY	O43043-DECOY		?		unknown	1
308	TRUE	Empty	Q7XSV4-DECOY	Q7XSV4-DECOY		?		unknown	1
309	TRUE	Empty	Q6LLD4-DECOY	Q6LLD4-DECOY		?		unknown	1
310	TRUE	Empty	Putative uncharacterized protein DDB_G0277255 OS=Dictyostelium discoideum OX=44689 GN=DDB_G0277255 PE=4 SV=1	Y9144_DICDI	DDB_G0277255	121 kDa		unknown	1
311	TRUE	Empty	Q7XHN8-DECOY	Q7XHN8-DECOY		?		unknown	1
312	TRUE	Empty	Q3SQ43-DECOY	Q3SQ43-DECOY		?		unknown	1
313	TRUE	Empty	Beclin-1-like protein A OS=Dictyostelium discoideum OX=44689 GN=atg6A PE=3 SV=1	BECNA_DICDI	atg6A	156 kDa		unknown	1
314	TRUE	Empty	O76062-DECOY	O76062-DECOY		?		unknown	1
315	TRUE	Empty	Asparagine-rich protein OS=Saccharomyces cerevisiae (strain ATCC 204508 / S288c) OX=559292 GN=NRP1 PE=1 SV=2	NRP1_YEAST	NRP1	79 kDa		unknown	1
316	TRUE	Empty	Homeobox protein LOX2 (Fragment) OS=Helobdella robusta OX=6412 GN=LOX2 PE=2 SV=1	HLOX2_HELRO	LOX2	47 kDa		unknown	1
317	TRUE	Empty	Homeobox protein 2 OS=Dictyostelium discoideum OX=44689 GN=hbx2 PE=2 SV=1	HBX2_DICDI	hbx2	107 kDa		unknown	1
318	TRUE	Empty	P24043-DECOY	P24043-DECOY		?		unknown	1
319	TRUE	Empty	Q8IWT3-DECOY	Q8IWT3-DECOY		?		unknown	1
320	TRUE	Empty	Keratin-associated protein 17-1 OS=Homo sapiens OX=9606 GN=KRTAP17-1 PE=3 SV=1	KR171_HUMAN	KRTAP17-1	10 kDa		unknown	1
321	TRUE	Empty	Probable cation-transporting ATPase 1 OS=Plasmodium falciparum OX=5833 PE=3 SV=1	ATX1_PLAFA		230 kDa		unknown	1
322	TRUE	Empty	Fatty acid-binding protein, heart OS=Bos mutus grunniens OX=30521 GN=FABP3 PE=3 SV=3	FABPH_BOSMU (+1)	FABP3	15 kDa		unknown	1
323	TRUE	Empty	A3LSZ2-DECOY	A3LSZ2-DECOY		?		unknown	1
324	TRUE	Empty	Q6F166-DECOY	Q6F166-DECOY		?		unknown	1
325	TRUE	Empty	P03304-DECOY	P03304-DECOY		?		unknown	1
326	TRUE	Empty	Inositol 1,4,5-trisphosphate receptor-like protein A OS=Dictyostelium discoideum OX=44689 GN=iplA PE=2 SV=1	IPLA_DICDI	iplA	361 kDa		unknown	1
327	TRUE	Empty	Platelet endothelial cell adhesion molecule OS=Bos taurus OX=9913 GN=PECAM1 PE=1 SV=1	PECA1_BOVIN	PECAM1	83 kDa		unknown	1
328	TRUE	Empty	Protein URE2 OS=Candida albicans (strain SC5314 / ATCC MYA-2876) OX=237561 GN=URE2 PE=3 SV=1	URE2_CANAL	URE2	39 kDa		unknown	1
329	TRUE	Empty	Q74DK5-DECOY	Q74DK5-DECOY		?		unknown	1
330	TRUE	Empty	Glycine, alanine and asparagine-rich protein OS=Haliotis asinina OX=109174 PE=1 SV=1	GAAP_HALAI		46 kDa		unknown	1
331	TRUE	Empty	Histone H1-delta OS=Strongylocentrotus purpuratus OX=7668 PE=3 SV=1	H1D_STRPU		19 kDa		unknown	1
332	TRUE	Empty	Q65X92-DECOY	Q65X92-DECOY		?		unknown	1
END OF FILE
