# Supplementary material for: Detection of gluten peptides in human duodenal fluids with immuno-liquid chromatography-mass spectrometry
Source: Royal Society of Chemistry journal article supplement (doi:10.1039/d4ay00852a), 2024-01-01
Supplement: d4ay00852a3.xlsx [file d4ay00852a3.xlsx]

## Sheet: SI_IDs_Sample_B
Sample B (3 LC-MS/MS replicates), Samples report created on 11/29/2022
Experiment: DDA Extra9 Pool
	Peak List Generator: unknown
		Version: unknown
		Charge States Calculated: unknown
		Deisotoped: unknown
		Textual Annotation: unknown
	Database Set: 1 Database
		Database Name: the SP2019_05_All_20190520 database
			Version: unknown
			Taxonomy: All Entries
			Number of Proteins: 560118
		Does database contain common contaminants?: unknown
	Search Engine Set: 1 Search Engine
		Search Engine: Mascot
			Version: 2.6.1
			Samples: All Samples
			Fragment Tolerance: 0.80 Da (Monoisotopic)
			Parent Tolerance: 5.0 PPM (Monoisotopic)
			Fixed Modifications:
			Variable Modifications: +1 on NQ (Deamidated), +16 on M (Oxidation)
			Database: the SP2019_05_All_20190520 database (unknown version, 560118 entries)
			Digestion Enzyme: Non specific
			Max Missed Cleavages: 0
			Probability Model:
				Mudpit_2020 10:53:37 PM;File Size: 949328771 [Byte] (F087623): Peptide Prophet with Delta Mass Correction (No decoys found) [all charge states]
	Scaffold: Version: Scaffold_5.0.0
		Modification Metadata Set: 2334 modifications
			Source: C:\Program Files\Scaffold 4\parameters\unimod.xml
			Comment:
		Protein Grouping Strategy: Experiment-wide grouping with binary peptide-protein weights
		Peptide Thresholds: 95.0 % minimum
		Protein Thresholds: 99.9 % minimum and 1 peptide minimum
		Peptide FDR: 0.3 % (Decoy)
		Protein FDR: 1.5 % (Decoy)
		GO Annotation Source(s):
		Pathway Annotation Source(s): Unknown
		Alternate ID Source(s): FASTA:UniProt/Swiss-Prot (UniProtKB)
									Exclusive Unique Peptide Count
Sample B									Uncategorized Sample
#	Visible?	Starred?	Identified Proteins (69)	Accession Number	Alternate ID	Molecular Weight	Protein Grouping Ambiguity	Taxonomy	Sample B
1	TRUE	Empty	Beta-casein OS=Bos taurus OX=9913 GN=CSN2 PE=1 SV=2	CASB_BOVIN	CSN2	25 kDa		unknown	27
2	TRUE	Empty	Vicilin OS=Pisum sativum OX=3888 PE=2 SV=2	VCLC_PEA		52 kDa	TRUE	unknown	7
3	TRUE	Empty	Alpha-S2-casein OS=Bos taurus OX=9913 GN=CSN1S2 PE=1 SV=2	CASA2_BOVIN	CSN1S2	26 kDa		unknown	10
4	TRUE	Empty	Basic salivary proline-rich protein 2 OS=Homo sapiens OX=9606 GN=PRB2 PE=1 SV=3	PRB2_HUMAN	PRB2	41 kDa	TRUE	unknown	10
5	TRUE	Empty	Alpha-S1-casein OS=Bos taurus OX=9913 GN=CSN1S1 PE=1 SV=2	CASA1_BOVIN	CSN1S1	25 kDa		unknown	9
6	TRUE	Empty	Alpha-amylase 2B OS=Homo sapiens OX=9606 GN=AMY2B PE=1 SV=1	AMY2B_HUMAN	AMY2B	58 kDa	TRUE	unknown	4
7	TRUE	Empty	Beta-lactoglobulin OS=Bos taurus OX=9913 GN=LGB PE=1 SV=3	LACB_BOVIN (+1)	LGB	20 kDa		unknown	13
8	TRUE	Empty	Carboxypeptidase A1 OS=Homo sapiens OX=9606 GN=CPA1 PE=1 SV=2	CBPA1_HUMAN	CPA1	47 kDa	TRUE	unknown	10
9	TRUE	Empty	Immunoglobulin alpha-2 heavy chain OS=Homo sapiens OX=9606 PE=1 SV=2	IGA2_HUMAN		49 kDa	TRUE	unknown	6
10	TRUE	Empty	Salivary acidic proline-rich phosphoprotein 1/2 OS=Homo sapiens OX=9606 GN=PRH1 PE=1 SV=2	PRPC_HUMAN	PRH1	17 kDa		unknown	10
11	TRUE	Empty	Pancreatic triacylglycerol lipase OS=Homo sapiens OX=9606 GN=PNLIP PE=1 SV=1	LIPP_HUMAN	PNLIP	51 kDa	TRUE	unknown	6
12	TRUE	Empty	Gastric triacylglycerol lipase OS=Homo sapiens OX=9606 GN=LIPF PE=1 SV=1	LIPG_HUMAN	LIPF	45 kDa		unknown	3
13	TRUE	Empty	Legumin A2 OS=Pisum sativum OX=3888 GN=LEGA2 PE=3 SV=1	LEGA2_PEA	LEGA2	59 kDa	TRUE	unknown	3
14	TRUE	Empty	Keratin, type II cytoskeletal 4 OS=Homo sapiens OX=9606 GN=KRT4 PE=1 SV=4	K2C4_HUMAN	KRT4	57 kDa	TRUE	unknown	3
15	TRUE	Empty	Basic salivary proline-rich protein 4 OS=Homo sapiens OX=9606 GN=PRB4 PE=1 SV=4	PRB4_HUMAN	PRB4	31 kDa	TRUE	unknown	5
16	TRUE	Empty	Provicilin (Fragment) OS=Pisum sativum OX=3888 PE=1 SV=1	VCLB_PEA		46 kDa	TRUE	unknown	4
17	TRUE	Empty	Hemoglobin subunit alpha OS=Homo sapiens OX=9606 GN=HBA1 PE=1 SV=2	HBA_HUMAN (+2)	HBA1	15 kDa		unknown	2
18	TRUE	Empty	Bile salt-activated lipase OS=Homo sapiens OX=9606 GN=CEL PE=1 SV=3	CEL_HUMAN	CEL	79 kDa		unknown	3
19	TRUE	Empty	BPI fold-containing family B member 1 OS=Homo sapiens OX=9606 GN=BPIFB1 PE=1 SV=1	BPIB1_HUMAN	BPIFB1	52 kDa		unknown	5
20	TRUE	Empty	Carboxypeptidase B OS=Homo sapiens OX=9606 GN=CPB1 PE=1 SV=4	CBPB1_HUMAN	CPB1	47 kDa		unknown	1
21	TRUE	Empty	Neuromedin-S OS=Bombina maxima OX=161274 GN=nms PE=1 SV=1	NMS_BOMMX	nms	17 kDa		unknown	1
22	TRUE	Empty	Actin, alpha skeletal muscle OS=Atractaspis microlepidota microlepidota OX=172021 GN=ACTA1 PE=2 SV=1	ACTS_ATRMM (+8)	ACTA1	42 kDa	TRUE	unknown	1
23	TRUE	Empty	Myosin heavy chain, skeletal muscle, adult OS=Gallus gallus OX=9031 PE=1 SV=4	MYSS_CHICK		223 kDa	TRUE	unknown	2
24	TRUE	Empty	Basic salivary proline-rich protein 3 OS=Homo sapiens OX=9606 GN=PRB3 PE=1 SV=2	PRB3_HUMAN	PRB3	31 kDa	TRUE	unknown	4
25	TRUE	Empty	Hemoglobin subunit beta OS=Homo sapiens OX=9606 GN=HBB PE=1 SV=2	HBB_HUMAN (+3)	HBB	16 kDa	TRUE	unknown	2
26	TRUE	Empty	BPI fold-containing family A member 2 OS=Homo sapiens OX=9606 GN=BPIFA2 PE=1 SV=2	BPIA2_HUMAN	BPIFA2	27 kDa		unknown	2
27	TRUE	Empty	BPI fold-containing family A member 1 OS=Homo sapiens OX=9606 GN=BPIFA1 PE=1 SV=1	BPIA1_HUMAN	BPIFA1	27 kDa		unknown	3
28	TRUE	Empty	Legumin J OS=Pisum sativum OX=3888 GN=LEGJ PE=1 SV=1	LEGJ_PEA	LEGJ	57 kDa	TRUE	unknown	2
29	TRUE	Empty	Provicilin (Fragment) OS=Pisum sativum OX=3888 PE=3 SV=1	VCLA_PEA		32 kDa	TRUE	unknown	2
30	TRUE	Empty	Keratin, type I cytoskeletal 13 OS=Homo sapiens OX=9606 GN=KRT13 PE=1 SV=4	K1C13_HUMAN	KRT13	50 kDa		unknown	3
31	TRUE	Empty	Convicilin (Fragment) OS=Pisum sativum OX=3888 GN=CVCB PE=2 SV=2	CVCB_PEA	CVCB	46 kDa	TRUE	unknown	5
32	TRUE	Empty	Glyceraldehyde-3-phosphate dehydrogenase OS=Gallus gallus OX=9031 GN=GAPDH PE=2 SV=3	G3P_CHICK	GAPDH	36 kDa	TRUE	unknown	3
33	TRUE	Empty	Immunoglobulin gamma-1 heavy chain OS=Homo sapiens OX=9606 PE=1 SV=2	IGG1_HUMAN		49 kDa	TRUE	unknown	2
34	TRUE	Empty	Carboxypeptidase A2 OS=Homo sapiens OX=9606 GN=CPA2 PE=1 SV=3	CBPA2_HUMAN	CPA2	47 kDa	TRUE	unknown	1
35	TRUE	Empty	Chymotrypsin-like elastase family member 2A OS=Homo sapiens OX=9606 GN=CELA2A PE=1 SV=1	CEL2A_HUMAN	CELA2A	29 kDa		unknown	5
36	TRUE	Empty	BPI fold-containing family B member 2 OS=Homo sapiens OX=9606 GN=BPIFB2 PE=1 SV=2	BPIB2_HUMAN	BPIFB2	49 kDa		unknown	4
37	TRUE	Empty	Seed linoleate 9S-lipoxygenase-3 OS=Pisum sativum OX=3888 GN=LOX1.3 PE=2 SV=1	LOX3_PEA	LOX1	98 kDa	TRUE	unknown	1
38	TRUE	Empty	Keratin, type II cytoskeletal 5 OS=Homo sapiens OX=9606 GN=KRT5 PE=1 SV=3	K2C5_HUMAN (+1)	KRT5	62 kDa	TRUE	unknown	1
39	TRUE	Empty	Lipocalin-1 OS=Homo sapiens OX=9606 GN=LCN1 PE=1 SV=1	LCN1_HUMAN	LCN1	19 kDa		unknown	2
40	TRUE	Empty	Beta-enolase OS=Gallus gallus OX=9031 GN=ENO3 PE=1 SV=3	ENOB_CHICK	ENO3	47 kDa		unknown	1
41	TRUE	Empty	Cystatin-B OS=Gorilla gorilla gorilla OX=9595 GN=CSTB PE=3 SV=1	CYTB_GORGO (+3)	CSTB	11 kDa		unknown	2
42	TRUE	Empty	Immunoglobulin kappa constant OS=Homo sapiens OX=9606 GN=IGKC PE=1 SV=2	IGKC_HUMAN (+1)	IGKC	12 kDa		unknown	4
43	TRUE	Empty	Elongation factor 1-alpha 1 OS=Bos taurus OX=9913 GN=EEF1A1 PE=1 SV=1	EF1A1_BOVIN (+11)	EEF1A1	50 kDa	TRUE	unknown	3
44	TRUE	Empty	Glycosylation-dependent cell adhesion molecule 1 OS=Bos taurus OX=9913 GN=GLYCAM1 PE=1 SV=2	GLCM1_BOVIN	GLYCAM1	17 kDa		unknown	1
45	TRUE	Empty	Alpha-2-macroglobulin OS=Homo sapiens OX=9606 GN=A2M PE=1 SV=3	A2MG_HUMAN	A2M	163 kDa		unknown	1
46	TRUE	Empty	Chymotrypsinogen B OS=Homo sapiens OX=9606 GN=CTRB1 PE=2 SV=2	CTRB1_HUMAN (+1)	CTRB1	28 kDa		unknown	1
47	TRUE	Empty	Basic salivary proline-rich protein 1 OS=Homo sapiens OX=9606 GN=PRB1 PE=1 SV=3	PRP1_HUMAN	PRB1	39 kDa	TRUE	unknown	2
48	TRUE	Empty	Cornulin OS=Homo sapiens OX=9606 GN=CRNN PE=1 SV=1	CRNN_HUMAN	CRNN	54 kDa		unknown	1
49	TRUE	Empty	Trypsin-3 OS=Homo sapiens OX=9606 GN=PRSS3 PE=1 SV=2	TRY3_HUMAN	PRSS3	33 kDa	TRUE	unknown	1
50	TRUE	Empty	Legumin B (Fragment) OS=Pisum sativum OX=3888 GN=LEGB PE=2 SV=1	LEGB_PEA	LEGB	39 kDa		unknown	1
51	TRUE	Empty	Immunoglobulin heavy constant alpha 1 OS=Homo sapiens OX=9606 GN=IGHA1 PE=1 SV=2	IGHA1_HUMAN	IGHA1	38 kDa	TRUE	unknown	1
52	TRUE	Empty	Annexin A1 OS=Homo sapiens OX=9606 GN=ANXA1 PE=1 SV=2	ANXA1_HUMAN (+2)	ANXA1	39 kDa		unknown	1
53	TRUE	Empty	Pancreatic lipase-related protein 2 OS=Homo sapiens OX=9606 GN=PNLIPRP2 PE=1 SV=2	LIPR2_HUMAN	PNLIPRP2	52 kDa	TRUE	unknown	1
54	TRUE	Empty	Cystatin-SN OS=Homo sapiens OX=9606 GN=CST1 PE=1 SV=3	CYTN_HUMAN	CST1	16 kDa	TRUE	unknown	1
55	TRUE	Empty	Legumin K (Fragment) OS=Pisum sativum OX=3888 GN=LEGK PE=3 SV=1	LEGK_PEA	LEGK	40 kDa	TRUE	unknown	1
56	TRUE	Empty	Gastricsin OS=Homo sapiens OX=9606 GN=PGC PE=1 SV=1	PEPC_HUMAN	PGC	42 kDa		unknown	2
57	TRUE	Empty	Mediator of RNA polymerase II transcription subunit 30 OS=Drosophila pseudoobscura pseudoobscura OX=46245 GN=MED30 PE=3 SV=2	MED30_DROPS	MED30	36 kDa		unknown	1
58	TRUE	Empty	Creatine kinase M-type OS=Gallus gallus OX=9031 GN=CKM PE=2 SV=1	KCRM_CHICK	CKM	43 kDa		unknown	1
59	TRUE	Empty	Keratin, type II cytoskeletal 6A OS=Homo sapiens OX=9606 GN=KRT6A PE=1 SV=3	K2C6A_HUMAN	KRT6A	60 kDa	TRUE	unknown	1
60	TRUE	Empty	Hyphally regulated cell wall protein 3 OS=Candida albicans (strain SC5314 / ATCC MYA-2876) OX=237561 GN=HYR3 PE=1 SV=1	HYR3_CANAL	HYR3	123 kDa		unknown	1
61	TRUE	Empty	Serum albumin OS=Bos taurus OX=9913 GN=ALB PE=1 SV=4	ALBU_BOVIN	ALB	69 kDa		unknown	1
62	TRUE	Empty	Glyceraldehyde-3-phosphate dehydrogenase OS=Homo sapiens OX=9606 GN=GAPDH PE=1 SV=3	G3P_HUMAN	GAPDH	36 kDa	TRUE	unknown	2
63	TRUE	Empty	UDP-glycosyltransferase 708D1 OS=Glycine max OX=3847 GN=UGT708D1 PE=1 SV=1	708D1_SOYBN	UGT708D1	53 kDa		unknown	2
64	TRUE	Empty	Legumin A OS=Pisum sativum OX=3888 GN=LEGA PE=1 SV=1	LEGA_PEA	LEGA	59 kDa	TRUE	unknown	1
65	TRUE	Empty	Lactotransferrin OS=Homo sapiens OX=9606 GN=LTF PE=1 SV=6	TRFL_HUMAN	LTF	78 kDa		unknown	1
66	TRUE	Empty	14-3-3 protein sigma OS=Homo sapiens OX=9606 GN=SFN PE=1 SV=1	1433S_HUMAN	SFN	28 kDa		unknown	1
67	TRUE	Empty	Fructose-bisphosphate aldolase A OS=Oryctolagus cuniculus OX=9986 GN=ALDOA PE=1 SV=2	ALDOA_RABIT	ALDOA	39 kDa		unknown	1
68	TRUE	Empty	Alpha-amylase 1 OS=Homo sapiens OX=9606 GN=AMY1A PE=1 SV=2	AMY1_HUMAN	AMY1A	58 kDa	TRUE	unknown	1
69	TRUE	Empty	A2ASS6-DECOY	A2ASS6-DECOY		?		unknown	1
END OF FILE
