# Supplementary material for: Detection of gluten peptides in human duodenal fluids with immuno-liquid chromatography-mass spectrometry
Source: Royal Society of Chemistry journal article supplement (doi:10.1039/d4ay00852a), 2024-01-01
Supplement: d4ay00852a4.xlsx [file d4ay00852a4.xlsx]

## Sheet: F088444
Header	--------------------------------------------------------
Search title	Sample_pep_after+Ab_01.raw
Timestamp	2020-04-20T10:32:01Z
User	proto
Email
Report URI	http://proteomics.dor.ch.nestle.com/mascot/cgi/master_results.pl?file=../data/20200420/F088444.dat
Peak list data path	\\cnfs.nihs.ch.nestle.com\msdata\Backup_Sirius\2020_04_15_DeepProteome_HumanMilk\Sample_pep_after+Ab_01.raw
Peak list format	Mascot generic
Search type	MIS
Mascot version	2001-06-02
Database	SP2019_05_All
Fasta file	SP2019_05_All_20190520.fasta
Total sequences	560118
Total residues	201292445
Sequences after taxonomy filter	39930
Number of queries	4266
Decoy	--------------------------------------------------------
PSM count in target above identity threshold	0
PSM count in decoy above identity threshold	1
Sequence count in target above identity threshold	0
Sequence count in decoy above identity threshold	1
PSM count in target above homology threshold	3
PSM count in decoy above homology threshold	3
Sequence count in target above homology threshold	3
Sequence count in decoy above homology threshold	3
PSM FDR using homology threshold	100
Sequence FDR using homology threshold	100
Variable modifications	--------------------------------------------------------
Identifier	Name	Delta	Neutral loss(es)
1	Deamidated (NQ)	0.984016
2	Oxidation (M)	15.9949	0	63.9983
Search Parameters	--------------------------------------------------------
Taxonomy filter	. . . . Viridiplantae (Green Plants)
Enzyme	None
Maximum Missed Cleavages	0
Fixed modifications
Variable modifications	Deamidated (NQ),Oxidation (M)
Peptide Mass Tolerance	5
Peptide Mass Tolerance Units	ppm
Fragment Mass Tolerance	0.6
Fragment Mass Tolerance Units	Da
Mass values	Monoisotopic
Instrument type	ESI-TRAP
Decoy database also searched	1
Format parameters	--------------------------------------------------------
Significance threshold	0.05
Target FDR (overrides sig. threshold)	0
Target FDR type	psm
Max. number of hits	0
Min. number of sig. unique sequences	1
Use MudPIT protein scoring	1
Ions score cut-off	-1
Include same-set proteins	0
Include sub-set proteins	0
Include unassigned	0
Require bold red	0
Use homology threshold	0
Group protein families	0
Re-score using Percolator	0
Show duplicate peptides	1
Protein hits	--------------------------------------------------------
prot_hit_num	prot_acc	prot_desc	prot_score	prot_mass	prot_matches	prot_matches_sig	prot_sequences	prot_sequences_sig	pep_query	pep_index	pep_rank	pep_isbold	pep_isunique	pep_exp_mz	pep_exp_mr	pep_exp_z	pep_calc_mr	pep_delta	pep_miss	pep_score	pep_expect	pep_res_before	pep_seq	pep_res_after	pep_var_mod	pep_var_mod_pos	pep_summed_mod_pos	pep_local_mod_pos	pep_scan_title
