# Supplementary material for: Detection of gluten peptides in human duodenal fluids with immuno-liquid chromatography-mass spectrometry
Source: Royal Society of Chemistry journal article supplement (doi:10.1039/d4ay00852a), 2024-01-01
Supplement: d4ay00852a5.xlsx [file d4ay00852a5.xlsx]

## Sheet: F088455
Header	--------------------------------------------------------
Search title	Sample_pep_after+Ab_02.raw
Timestamp	2020-04-20T11:04:57Z
User	proto
Email
Report URI	http://proteomics.dor.ch.nestle.com/mascot/cgi/master_results.pl?file=../data/20200420/F088455.dat
Peak list data path	\\cnfs.nihs.ch.nestle.com\msdata\Backup_Sirius\2020_04_15_DeepProteome_HumanMilk\Sample_pep_after+Ab_02.raw
Peak list format	Mascot generic
Search type	MIS
Mascot version	2001-06-02
Database	SP2019_05_All
Fasta file	SP2019_05_All_20190520.fasta
Total sequences	560118
Total residues	201292445
Sequences after taxonomy filter	39930
Number of queries	8331
Decoy	--------------------------------------------------------
PSM count in target above identity threshold	14
PSM count in decoy above identity threshold	3
Sequence count in target above identity threshold	14
Sequence count in decoy above identity threshold	3
PSM count in target above homology threshold	43
PSM count in decoy above homology threshold	30
Sequence count in target above homology threshold	43
Sequence count in decoy above homology threshold	29
PSM FDR using homology threshold	69.77
PSM FDR using identity threshold	21.43
Sequence FDR using homology threshold	67.44
Sequence FDR using identity threshold	21.43
Protein family member count in target	12
Protein family member count in decoy	5
Protein false discovery rate	41.67
Variable modifications	--------------------------------------------------------
Identifier	Name	Delta	Neutral loss(es)
1	Deamidated (NQ)	0.984016
2	Oxidation (M)	15.9949	0	63.9983
Search Parameters	--------------------------------------------------------
Taxonomy filter	. . . . Viridiplantae (Green Plants)
Enzyme	None
Maximum Missed Cleavages	0
Fixed modifications
Variable modifications	Deamidated (NQ),Oxidation (M)
Peptide Mass Tolerance	5
Peptide Mass Tolerance Units	ppm
Fragment Mass Tolerance	0.6
Fragment Mass Tolerance Units	Da
Mass values	Monoisotopic
Instrument type	ESI-TRAP
Decoy database also searched	1
Format parameters	--------------------------------------------------------
Significance threshold	0.05
Target FDR (overrides sig. threshold)	0
Target FDR type	psm
Max. number of hits	0
Min. number of sig. unique sequences	1
Use MudPIT protein scoring	1
Ions score cut-off	-1
Include same-set proteins	0
Include sub-set proteins	0
Include unassigned	0
Require bold red	0
Use homology threshold	0
Group protein families	0
Re-score using Percolator	0
Show duplicate peptides	1
Protein hits	--------------------------------------------------------
prot_hit_num	prot_acc	prot_desc	prot_score	prot_mass	prot_matches	prot_matches_sig	prot_sequences	prot_sequences_sig	pep_query	pep_index	pep_rank	pep_isbold	pep_isunique	pep_exp_mz	pep_exp_mr	pep_exp_z	pep_calc_mr	pep_delta	pep_miss	pep_score	pep_expect	pep_res_before	pep_seq	pep_res_after	pep_var_mod	pep_var_mod_pos	pep_summed_mod_pos	pep_local_mod_pos	pep_scan_title
1	P04721	Alpha/beta-gliadin A-I OS=Triticum aestivum OX=4565 PE=2 SV=1	111	30384	2	2	2	2	6983	6061	1	1	1	987.873	2960.6	3	2960.58	0.0126	0	74.67	5.7e-05	A	VRVPVPQLQPQNPSQQQPQEQVPLVQ	Q					Sample_pep_after+Ab_02.10406.10406.3
1	P04721	Alpha/beta-gliadin A-I OS=Triticum aestivum OX=4565 PE=2 SV=1	111	30384	2	2	2	2	7525	6259	1	1	1	1164.95	3491.83	3	3491.83	0.0047	0	61.36	0.0022	A	VRVPVPQLQPQNPSQQQPQEQVPLVQQQQF	L					Sample_pep_after+Ab_02.10630.10630.3
2	O65316	Actin OS=Mesostigma viride OX=41882 PE=3 SV=1	102	41563	2	2	2	2	4546	6197	1	1	1	895.949	1789.88	2	1789.88	-0.0015	0	89.32	2.1e-06	K	SYELPDGQVITIGNER	F					Sample_pep_after+Ab_02.10559.10559.2
2	O65316	Actin OS=Mesostigma viride OX=41882 PE=3 SV=1	102	41563	2	2	2	2	5257	4425	1	1	1	652.027	1953.06	3	1953.06	0.0022	0	44.24	0.041	R	VAPEEHPVLLTEAPLNPK	A					Sample_pep_after+Ab_02.8004.8004.3
3	P0C030	Ubiquitin-NEDD8-like protein RUB1 OS=Oryza sativa subsp. japonica OX=39947 GN=RUB1 PE=2 SV=2	84	17119	2	2	2	2	563	3131	1	1	1	469.793	937.571	2	937.571	-0.0002	0	41.05	0.008	E	STLHLVLR	L					Sample_pep_after+Ab_02.6499.6499.2
3	P0C030	Ubiquitin-NEDD8-like protein RUB1 OS=Oryza sativa subsp. japonica OX=39947 GN=RUB1 PE=2 SV=2	84	17119	2	2	2	2	1063	3115	1	1	1	534.314	1066.61	2	1066.61	0	0	72.77	1.4e-05	K	ESTLHLVLR	L					Sample_pep_after+Ab_02.6480.6480.2
4	F4HYF3	Bifunctional D-cysteine desulfhydrase/1-aminocyclopropane-1-carboxylate deaminase, mitochondrial OS=Arabidopsis thaliana OX=3702 GN=DCD PE=1 SV=1	45	43873	1	1	1	1	855	6292	1	1	1	506.811	1011.61	2	1011.61	-0.0004	0	44.99	0.0084	G	NLLVERLVG	A					Sample_pep_after+Ab_02.10666.10666.2
5	P0CG89	Histone H4 OS=Glycine max OX=3847 PE=3 SV=1	45	11402	1	1	1	1	1507	3866	1	1	1	590.815	1179.62	2	1179.61	0.0018	0	44.72	0.031	R	ISGLIYEETR	G					Sample_pep_after+Ab_02.7363.7363.2
6	Q9M9L8	Lon protease homolog 3, mitochondrial OS=Arabidopsis thaliana OX=3702 GN=LON3 PE=3 SV=1	44	103411	1	1	1	1	1196	4169	1	1	1	550.838	1099.66	2	1099.66	0.0019	0	43.62	0.015	K	KQVEINKIK	E	Deamidated (NQ)	0.010000000.0			Sample_pep_after+Ab_02.7715.7715.2
7	Q9M9L7	Lon protease homolog 4, chloroplastic/mitochondrial OS=Arabidopsis thaliana OX=3702 GN=LON4 PE=3 SV=1	43	104859	1	1	1	1	1171	358	1	1	1	549.283	1096.55	2	1096.55	0.0008	0	42.73	0.043	E	EGEGKGGLHIT	G					Sample_pep_after+Ab_02.2775.2775.2
8	Q0E3C8	Chaperone protein ClpB3, mitochondrial OS=Oryza sativa subsp. japonica OX=39947 GN=CLPB3 PE=2 SV=3	42	109179	1	1	1	1	1962	3748	1	1	1	647.362	1292.71	2	1292.71	0.0008	0	42.08	0.033	K	NNPVIIGEPGVGK	T					Sample_pep_after+Ab_02.7229.7229.2
9	F4JVJ1	Putative chaperone protein ClpB2, chloroplastic OS=Arabidopsis thaliana OX=3702 GN=CLPB2 PE=3 SV=1	42	68855	1	1	1	1	1962	3748	1	0	1	647.362	1292.71	2	1292.71	0.0008	0	42.08	0.033	K	NNPVLIGEPGVGK	T					Sample_pep_after+Ab_02.7229.7229.2
10	Q9LMP7	Golgi SNAP receptor complex member 1-1 OS=Arabidopsis thaliana OX=3702 GN=GOS11 PE=2 SV=1	41	25198	1	1	1	1	584	6368	1	1	1	472.787	943.559	2	943.559	0.0001	0	40.69	0.034	M	DTIILSLVA	A					Sample_pep_after+Ab_02.10748.10748.2
11	P68526	ATP synthase subunit a OS=Triticum timopheevii OX=4570 GN=ATP6 PE=3 SV=1	39	42965	1	1	1	1	463	1821	1	1	1	457.289	912.563	2	912.564	-0.0012	0	38.94	0.042	I	AGVTIVLQI	E					Sample_pep_after+Ab_02.4876.4876.2
12	Q9ZU88	Pentatricopeptide repeat-containing protein At2g48000 OS=Arabidopsis thaliana OX=3702 GN=At2g48000 PE=2 SV=1	29	55004	1	1	1	1	663	5940	1	1	1	480.309	958.603	2	958.6	0.0028	0	29.41	0.043	K	KTLCILLR	V					Sample_pep_after+Ab_02.10268.10268.2
12	Q9ZU88	Pentatricopeptide repeat-containing protein At2g48000 OS=Arabidopsis thaliana OX=3702 GN=At2g48000 PE=2 SV=1	29	55004	1	1	1	1	663	5940	1	1	1	480.309	958.603	2	958.6	0.0028	0	29.41	0.043	K	KTLCILLR	V					Sample_pep_after+Ab_02.10268.10268.2
