# Supplementary material for: Detection of gluten peptides in human duodenal fluids with immuno-liquid chromatography-mass spectrometry
Source: Royal Society of Chemistry journal article supplement (doi:10.1039/d4ay00852a), 2024-01-01
Supplement: d4ay00852a6.xlsx [file d4ay00852a6.xlsx]

## Sheet: F088456
Header	--------------------------------------------------------
Search title	Sample_pep_after+Ab_03.raw
Timestamp	2020-04-20T11:41:42Z
User	proto
Email
Report URI	http://proteomics.dor.ch.nestle.com/mascot/cgi/master_results.pl?file=../data/20200420/F088456.dat
Peak list data path	\\cnfs.nihs.ch.nestle.com\msdata\Backup_Sirius\2020_04_15_DeepProteome_HumanMilk\Sample_pep_after+Ab_03.raw
Peak list format	Mascot generic
Search type	MIS
Mascot version	2001-06-02
Database	SP2019_05_All
Fasta file	SP2019_05_All_20190520.fasta
Total sequences	560118
Total residues	201292445
Sequences after taxonomy filter	39930
Number of queries	6067
Decoy	--------------------------------------------------------
PSM count in target above identity threshold	7
PSM count in decoy above identity threshold	1
Sequence count in target above identity threshold	7
Sequence count in decoy above identity threshold	1
PSM count in target above homology threshold	21
PSM count in decoy above homology threshold	10
Sequence count in target above homology threshold	21
Sequence count in decoy above homology threshold	10
PSM FDR using homology threshold	47.62
PSM FDR using identity threshold	14.29
Sequence FDR using homology threshold	47.62
Sequence FDR using identity threshold	14.29
Protein family member count in target	14
Protein family member count in decoy	2
Protein false discovery rate	14.29
Variable modifications	--------------------------------------------------------
Identifier	Name	Delta	Neutral loss(es)
1	Deamidated (NQ)	0.984016
2	Oxidation (M)	15.9949	0	63.9983
Search Parameters	--------------------------------------------------------
Taxonomy filter	. . . . Viridiplantae (Green Plants)
Enzyme	None
Maximum Missed Cleavages	0
Fixed modifications
Variable modifications	Deamidated (NQ),Oxidation (M)
Peptide Mass Tolerance	5
Peptide Mass Tolerance Units	ppm
Fragment Mass Tolerance	0.6
Fragment Mass Tolerance Units	Da
Mass values	Monoisotopic
Instrument type	ESI-TRAP
Decoy database also searched	1
Format parameters	--------------------------------------------------------
Significance threshold	0.05
Target FDR (overrides sig. threshold)	0
Target FDR type	psm
Max. number of hits	0
Min. number of sig. unique sequences	1
Use MudPIT protein scoring	1
Ions score cut-off	-1
Include same-set proteins	0
Include sub-set proteins	0
Include unassigned	0
Require bold red	0
Use homology threshold	0
Group protein families	0
Re-score using Percolator	0
Show duplicate peptides	1
Protein hits	--------------------------------------------------------
prot_hit_num	prot_acc	prot_desc	prot_score	prot_mass	prot_matches	prot_matches_sig	prot_sequences	prot_sequences_sig	pep_query	pep_index	pep_rank	pep_isbold	pep_isunique	pep_exp_mz	pep_exp_mr	pep_exp_z	pep_calc_mr	pep_delta	pep_miss	pep_score	pep_expect	pep_res_before	pep_seq	pep_res_after	pep_var_mod	pep_var_mod_pos	pep_summed_mod_pos	pep_local_mod_pos	pep_scan_title
1	P0C030	Ubiquitin-NEDD8-like protein RUB1 OS=Oryza sativa subsp. japonica OX=39947 GN=RUB1 PE=2 SV=2	75	17119	1	1	1	1	810	3251	1	1	1	534.314	1066.61	2	1066.61	-0.0002	0	75.45	7.8e-06	K	ESTLHLVLR	L					Sample_pep_after+Ab_03.8480.8480.2
2	P04721	Alpha/beta-gliadin A-I OS=Triticum aestivum OX=4565 PE=2 SV=1	65	30384	1	1	1	1	5312	4481	1	1	1	873.964	3491.83	4	3491.83	-0.0005	0	64.59	0.0011	A	VRVPVPQLQPQNPSQQQPQEQVPLVQQQQF	L					Sample_pep_after+Ab_03.10087.10087.4
3	P04722	Alpha/beta-gliadin A-II OS=Triticum aestivum OX=4565 PE=2 SV=1	55	33640	1	1	1	1	4980	652	1	1	1	1002.51	3004.5	3	3004.49	0.0108	0	55.11	0.0099	A	IILHQQHHHHQQQQQQQQQQPLSQ	V					Sample_pep_after+Ab_03.4468.4468.3
4	P04724	Alpha/beta-gliadin A-IV OS=Triticum aestivum OX=4565 PE=2 SV=1	54	34217	1	1	1	1	5314	4523	1	1	1	874.464	3493.83	4	3493.83	-0.0044	0	53.51	0.014	A	VRVPVPQLQPQNPSQQQPQKQVPLVQQQQF	P	3 Deamidated (NQ)	0.000000000000000000101000010000.0			Sample_pep_after+Ab_03.10134.10134.4
5	P04727	Alpha/beta-gliadin clone PW8142 OS=Triticum aestivum OX=4565 PE=3 SV=1	54	36095	1	1	1	1	5314	4523	1	0	1	874.464	3493.83	4	3493.83	-0.0044	0	53.51	0.014	A	VRVPVPQLQPKNPSQQQPQEQVPLVQQQQF	P	2 Deamidated (NQ)	0.000000000000000000001000010000.0			Sample_pep_after+Ab_03.10134.10134.4
6	Q9C9H6	Receptor-like protein 11 OS=Arabidopsis thaliana OX=3702 GN=RLP11 PE=3 SV=1	51	88675	1	1	1	1	913	3721	1	1	1	550.838	1099.66	2	1099.66	0.0008	0	51.48	0.0025	S	KLQNLILTR	N	2 Deamidated (NQ)	0.001100000.0			Sample_pep_after+Ab_03.9000.9000.2
7	Q6YXK6	30S ribosomal protein S19, chloroplastic OS=Physcomitrella patens subsp. patens OX=3218 GN=rps19 PE=3 SV=1	50	10604	1	1	1	1	913	3721	2	0	1	550.838	1099.66	2	1099.66	0.0008	0	49.89	0.0036	K	KIEDLNLKK	E					Sample_pep_after+Ab_03.9000.9000.2
8	A6H5M2	30S ribosomal protein S19, chloroplastic OS=Cycas taitungensis OX=54799 GN=rps19 PE=3 SV=1	48	10437	1	1	1	1	913	3721	3	0	1	550.838	1099.66	2	1099.66	0.0008	0	47.8	0.0058	R	KIENLNIKK	E	Deamidated (NQ)	0.000100000.0			Sample_pep_after+Ab_03.9000.9000.2
9	P06377	30S ribosomal protein S19, chloroplastic OS=Marchantia polymorpha OX=3197 GN=rps19 PE=3 SV=3	48	10547	1	1	1	1	913	3721	3	0	1	550.838	1099.66	2	1099.66	0.0008	0	47.8	0.0058	K	KIENLNLKK	E	Deamidated (NQ)	0.000100000.0			Sample_pep_after+Ab_03.9000.9000.2
10	Q9M886	LOB domain-containing protein 41 OS=Arabidopsis thaliana OX=3702 GN=LBD41 PE=2 SV=1	48	28399	1	1	1	1	913	3721	5	0	1	550.838	1099.66	2	1099.66	0.0008	0	47.6	0.0061	G	EIKLDLTLR	L					Sample_pep_after+Ab_03.9000.9000.2
11	Q769E5	Vacuolar cation/proton exchanger 1a OS=Oryza sativa subsp. japonica OX=39947 GN=CAX1a PE=1 SV=1	46	47676	1	1	1	1	913	3721	6	0	1	550.838	1099.66	2	1099.66	0.0008	0	45.81	0.0092	L	KNKLDITLGV	A					Sample_pep_after+Ab_03.9000.9000.2
12	Q9M9L8	Lon protease homolog 3, mitochondrial OS=Arabidopsis thaliana OX=3702 GN=LON3 PE=3 SV=1	41	103411	1	1	1	1	913	3721	7	0	1	550.838	1099.66	2	1099.66	0.0008	0	41	0.028	K	KQVEINKIK	E	Deamidated (NQ)	0.010000000.0			Sample_pep_after+Ab_03.9000.9000.2
13	Q7X993	Transcription factor TGA2.1 OS=Oryza sativa subsp. japonica OX=39947 GN=TGA2.1 PE=1 SV=1	41	37192	1	1	1	1	675	3351	1	1	1	506.793	1011.57	2	1011.57	0	0	40.98	0.036	Q	QLLGLNNLQ	E					Sample_pep_after+Ab_03.8591.8591.2
14	Q6YYZ2	4-coumarate--CoA ligase-like 3 OS=Oryza sativa subsp. japonica OX=39947 GN=4CLL3 PE=3 SV=1	34	62042	1	1	1	1	714	3492	1	1	1	512.821	1023.63	2	1023.63	-0.0049	0	33.81	0.048	K	GSVVLLLLPN	S					Sample_pep_after+Ab_03.8746.8746.2
14	Q6YYZ2	4-coumarate--CoA ligase-like 3 OS=Oryza sativa subsp. japonica OX=39947 GN=4CLL3 PE=3 SV=1	34	62042	1	1	1	1	714	3492	1	1	1	512.821	1023.63	2	1023.63	-0.0049	0	33.81	0.048	K	GSVVLLLLPN	S					Sample_pep_after+Ab_03.8746.8746.2
