# Supplementary material for: Detection of gluten peptides in human duodenal fluids with immuno-liquid chromatography-mass spectrometry
Source: Royal Society of Chemistry journal article supplement (doi:10.1039/d4ay00852a), 2024-01-01
Supplement: d4ay00852a7.xlsx [file d4ay00852a7.xlsx]

## Sheet: F088458
Header	--------------------------------------------------------
Search title	Sample_pep_after+Ab_04.raw
Timestamp	2020-04-20T12:11:04Z
User	proto
Email
Report URI	http://proteomics.dor.ch.nestle.com/mascot/cgi/master_results.pl?file=../data/20200420/F088458.dat
Peak list data path	\\cnfs.nihs.ch.nestle.com\msdata\Backup_Sirius\2020_04_15_DeepProteome_HumanMilk\Sample_pep_after+Ab_04.raw
Peak list format	Mascot generic
Search type	MIS
Mascot version	2001-06-02
Database	SP2019_05_All
Fasta file	SP2019_05_All_20190520.fasta
Total sequences	560118
Total residues	201292445
Sequences after taxonomy filter	39930
Number of queries	7828
Decoy	--------------------------------------------------------
PSM count in target above identity threshold	23
PSM count in decoy above identity threshold	8
Sequence count in target above identity threshold	21
Sequence count in decoy above identity threshold	8
PSM count in target above homology threshold	90
PSM count in decoy above homology threshold	30
Sequence count in target above homology threshold	71
Sequence count in decoy above homology threshold	30
PSM FDR using homology threshold	33.33
PSM FDR using identity threshold	34.78
Sequence FDR using homology threshold	42.25
Sequence FDR using identity threshold	38.1
Protein family member count in target	24
Protein family member count in decoy	11
Protein false discovery rate	45.83
Variable modifications	--------------------------------------------------------
Identifier	Name	Delta	Neutral loss(es)
1	Deamidated (NQ)	0.984016
2	Oxidation (M)	15.9949	0	63.9983
Search Parameters	--------------------------------------------------------
Taxonomy filter	. . . . Viridiplantae (Green Plants)
Enzyme	None
Maximum Missed Cleavages	0
Fixed modifications
Variable modifications	Deamidated (NQ),Oxidation (M)
Peptide Mass Tolerance	5
Peptide Mass Tolerance Units	ppm
Fragment Mass Tolerance	0.6
Fragment Mass Tolerance Units	Da
Mass values	Monoisotopic
Instrument type	ESI-TRAP
Decoy database also searched	1
Format parameters	--------------------------------------------------------
Significance threshold	0.05
Target FDR (overrides sig. threshold)	0
Target FDR type	psm
Max. number of hits	0
Min. number of sig. unique sequences	1
Use MudPIT protein scoring	1
Ions score cut-off	-1
Include same-set proteins	0
Include sub-set proteins	0
Include unassigned	0
Require bold red	0
Use homology threshold	0
Group protein families	0
Re-score using Percolator	0
Show duplicate peptides	1
Protein hits	--------------------------------------------------------
prot_hit_num	prot_acc	prot_desc	prot_score	prot_mass	prot_matches	prot_matches_sig	prot_sequences	prot_sequences_sig	pep_query	pep_index	pep_rank	pep_isbold	pep_isunique	pep_exp_mz	pep_exp_mr	pep_exp_z	pep_calc_mr	pep_delta	pep_miss	pep_score	pep_expect	pep_res_before	pep_seq	pep_res_after	pep_var_mod	pep_var_mod_pos	pep_summed_mod_pos	pep_local_mod_pos	pep_scan_title
1	P18573	Alpha/beta-gliadin MM1 OS=Triticum aestivum OX=4565 PE=1 SV=1	201	35375	6	6	4	4	5982	4670	1	1	0	809.093	2424.26	3	2424.25	0.0061	0	48.77	0.027	A	VRVPVPQLQPQNPSQQQPQEQ	V					Sample_pep_after+Ab_04.8592.8592.3
1	P18573	Alpha/beta-gliadin MM1 OS=Triticum aestivum OX=4565 PE=1 SV=1	201	35375	6	6	4	4	6005	1718	1	1	1	819.76	2456.26	3	2456.25	0.006	0	60.22	0.0022	A	IILHQQQQQQQQQQQQPLSQ	V					Sample_pep_after+Ab_04.5067.5067.3
1	P18573	Alpha/beta-gliadin MM1 OS=Triticum aestivum OX=4565 PE=1 SV=1	201	35375	6	6	4	4	7651	7737	1	1	1	1336.94	5343.74	4	5343.73	0.0052	0	62.42	0.0041	Y	LQLQPFPQPQLPYPQPQLPYPQPQLPYPQPQPFRPQQPYPQSQPQ	Y					Sample_pep_after+Ab_04.13268.13268.4
1	P18573	Alpha/beta-gliadin MM1 OS=Triticum aestivum OX=4565 PE=1 SV=1	201	35375	6	6	4	4	7653	7397	1	1	1	1337.19	5344.73	4	5344.71	0.0188	0	65.17	0.0022	Y	LQLQPFPQPQLPYPQPQLPYPQPQLPYPQPQPFRPQQPYPQSQPQ	Y	Deamidated (NQ)	0.000000000000000000000001000000000000000000000.0			Sample_pep_after+Ab_04.12256.12256.4
1	P18573	Alpha/beta-gliadin MM1 OS=Triticum aestivum OX=4565 PE=1 SV=1	201	35375	6	6	4	4	7700	7550	1	1	1	1377.95	5507.79	4	5507.78	0.0136	0	53.19	0.038	Y	LQLQPFPQPQLPYPQPQLPYPQPQLPYPQPQPFRPQQPYPQSQPQY	S	Deamidated (NQ)	0.0000000000000000100000000000000000000000000000.0			Sample_pep_after+Ab_04.12551.12551.4
1	P18573	Alpha/beta-gliadin MM1 OS=Triticum aestivum OX=4565 PE=1 SV=1	201	35375	6	6	4	4	7701	7619	1	1	1	1377.96	5507.79	4	5507.78	0.017	0	57.83	0.013	Y	LQLQPFPQPQLPYPQPQLPYPQPQLPYPQPQPFRPQQPYPQSQPQY	S	Deamidated (NQ)	0.0000000000000000000000000000001000000000000000.0			Sample_pep_after+Ab_04.12791.12791.4
2	O65316	Actin OS=Mesostigma viride OX=41882 PE=3 SV=1	87	41563	1	1	1	1	4374	6020	1	1	1	895.951	1789.89	2	1789.88	0.0021	0	86.52	3.6e-06	K	SYELPDGQVITIGNER	F					Sample_pep_after+Ab_04.10584.10584.2
3	P0C030	Ubiquitin-NEDD8-like protein RUB1 OS=Oryza sativa subsp. japonica OX=39947 GN=RUB1 PE=2 SV=2	80	17119	2	2	2	2	608	3213	1	1	1	469.793	937.571	2	937.571	-0.0001	0	34.3	0.038	E	STLHLVLR	L					Sample_pep_after+Ab_04.6911.6911.2
3	P0C030	Ubiquitin-NEDD8-like protein RUB1 OS=Oryza sativa subsp. japonica OX=39947 GN=RUB1 PE=2 SV=2	80	17119	2	2	2	2	1095	3186	1	1	1	534.314	1066.61	2	1066.61	0	0	72.7	1.5e-05	K	ESTLHLVLR	L					Sample_pep_after+Ab_04.6881.6881.2
4	P04721	Alpha/beta-gliadin A-I OS=Triticum aestivum OX=4565 PE=2 SV=1	75	30384	2	2	2	2	5982	4670	1	0	0	809.093	2424.26	3	2424.25	0.0061	0	48.77	0.027	A	VRVPVPQLQPQNPSQQQPQEQ	V					Sample_pep_after+Ab_04.8592.8592.3
4	P04721	Alpha/beta-gliadin A-I OS=Triticum aestivum OX=4565 PE=2 SV=1	75	30384	2	2	2	2	7160	6898	1	1	1	1238.64	3712.91	3	3712.92	-0.0033	0	58.07	0.006	Y	LQLQPFLQPQLPYSQPQPFRPQQPYPQPQPQ	Y					Sample_pep_after+Ab_04.11705.11705.3
5	P04723	Alpha/beta-gliadin A-III OS=Triticum aestivum OX=4565 PE=2 SV=1	72	32216	2	2	2	2	5982	4670	1	0	0	809.093	2424.26	3	2424.25	0.0061	0	48.77	0.027	A	VRVPVPQLQPQNPSQQQPQEQ	V					Sample_pep_after+Ab_04.8592.8592.3
5	P04723	Alpha/beta-gliadin A-III OS=Triticum aestivum OX=4565 PE=2 SV=1	72	32216	2	2	2	2	6495	5676	1	1	1	961.174	2880.5	3	2880.49	0.0075	0	53.24	0.012	A	VRVPVPQLQPQNPSQQQPQEQVPLM	Q	Oxidation (M)	0.0000000000000000000000002.0			Sample_pep_after+Ab_04.10196.10196.3
6	P02863	Alpha/beta-gliadin OS=Triticum aestivum OX=4565 PE=2 SV=2	64	32943	1	1	1	1	7099	6206	1	1	1	1195.61	3583.81	3	3583.8	0.0146	0	63.78	0.0017	L	QLQPFPQPQLPYSQPQPFRPQQPYPQPQPQ	Y					Sample_pep_after+Ab_04.10794.10794.3
7	P13918	Vicilin OS=Pisum sativum OX=3888 PE=2 SV=2	55	52200	1	1	1	1	1510	4854	1	1	1	589.356	1176.7	2	1176.7	0.0002	0	55.36	0.00046	D	LAIPVNRPGQL	Q					Sample_pep_after+Ab_04.8803.8803.2
8	Q9C9H6	Receptor-like protein 11 OS=Arabidopsis thaliana OX=3702 GN=RLP11 PE=3 SV=1	52	88675	1	1	1	1	1224	4413	1	1	1	550.838	1099.66	2	1099.66	0.0009	0	51.69	0.0024	S	KLQNLILTR	N	2 Deamidated (NQ)	0.001100000.0			Sample_pep_after+Ab_04.8289.8289.2
9	P16315	Glutenin, low molecular weight subunit PTDUCD1 OS=Triticum aestivum OX=4565 PE=2 SV=1	51	33358	1	1	1	1	3518	5947	1	1	1	806.411	1610.81	2	1610.81	0.0024	0	50.7	0.011	F	SQQQQPVLPQQSPF	S					Sample_pep_after+Ab_04.10501.10501.2
10	Q6YXK6	30S ribosomal protein S19, chloroplastic OS=Physcomitrella patens subsp. patens OX=3218 GN=rps19 PE=3 SV=1	50	10604	1	1	1	1	1224	4413	2	0	1	550.838	1099.66	2	1099.66	0.0009	0	50.05	0.0035	K	KIEDLNLKK	E					Sample_pep_after+Ab_04.8289.8289.2
11	Q9M9L8	Lon protease homolog 3, mitochondrial OS=Arabidopsis thaliana OX=3702 GN=LON3 PE=3 SV=1	48	103411	1	1	1	1	1224	4413	3	0	1	550.838	1099.66	2	1099.66	0.0009	0	48.13	0.0054	K	KQVEINKIK	E	Deamidated (NQ)	0.010000000.0			Sample_pep_after+Ab_04.8289.8289.2
12	A6H5M2	30S ribosomal protein S19, chloroplastic OS=Cycas taitungensis OX=54799 GN=rps19 PE=3 SV=1	48	10437	1	1	1	1	1224	4413	4	0	1	550.838	1099.66	2	1099.66	0.0009	0	47.95	0.0056	R	KIENLNIKK	E	Deamidated (NQ)	0.000100000.0			Sample_pep_after+Ab_04.8289.8289.2
13	P06377	30S ribosomal protein S19, chloroplastic OS=Marchantia polymorpha OX=3197 GN=rps19 PE=3 SV=3	48	10547	1	1	1	1	1224	4413	4	0	1	550.838	1099.66	2	1099.66	0.0009	0	47.95	0.0056	K	KIENLNLKK	E	Deamidated (NQ)	0.000100000.0			Sample_pep_after+Ab_04.8289.8289.2
14	Q9M886	LOB domain-containing protein 41 OS=Arabidopsis thaliana OX=3702 GN=LBD41 PE=2 SV=1	48	28399	1	1	1	1	1224	4413	6	0	1	550.838	1099.66	2	1099.66	0.0009	0	47.7	0.006	G	EIKLDLTLR	L					Sample_pep_after+Ab_04.8289.8289.2
15	P0C520	ATP synthase subunit alpha, mitochondrial OS=Oryza sativa OX=4530 GN=ATPA PE=3 SV=1	47	55339	1	1	1	1	943	4816	1	1	1	513.801	1025.59	2	1025.59	0.0002	0	46.64	0.0083	K	AVDSLVPIGR	G					Sample_pep_after+Ab_04.8761.8761.2
16	Q769E5	Vacuolar cation/proton exchanger 1a OS=Oryza sativa subsp. japonica OX=39947 GN=CAX1a PE=1 SV=1	46	47676	1	1	1	1	1224	4413	7	0	1	550.838	1099.66	2	1099.66	0.0009	0	46.05	0.0087	L	KNKLDITLGV	A					Sample_pep_after+Ab_04.8289.8289.2
17	P02582	Actin-1 OS=Zea mays OX=4577 GN=ACT1 PE=3 SV=1	44	41591	1	1	1	1	5027	4304	1	1	1	652.687	1955.04	3	1955.04	0.0041	0	44.2	0.046	R	VSPEDHPVLLTEAPLNPK	A					Sample_pep_after+Ab_04.8166.8166.3
18	P04730	Gamma-gliadin (Fragment) OS=Triticum aestivum OX=4565 PE=2 SV=1	42	27320	1	1	1	1	1001	3044	1	1	1	524.301	1046.59	2	1046.59	-0.0004	0	41.95	0.035	F	LQPHQIAQL	E					Sample_pep_after+Ab_04.6719.6719.2
19	A0A1D6IEG9	Pentatricopeptide repeat-containing protein CRP1, chloroplastic OS=Zea mays OX=4577 GN=CRP1 PE=1 SV=1	42	73177	1	1	1	1	2010	3472	1	1	1	652.875	1303.74	2	1303.74	-0.0023	0	41.79	0.031	V	SILVLNSLINAF	G	Deamidated (NQ)	0.000000000100.0			Sample_pep_after+Ab_04.7212.7212.2
20	F4IJZ6	Protein STRICTOSIDINE SYNTHASE-LIKE 1 OS=Arabidopsis thaliana OX=3702 GN=SSL1 PE=3 SV=1	40	44363	1	1	1	1	2063	4341	1	1	1	659.381	1316.75	2	1316.75	0.003	0	40.14	0.047	G	PYVGVTDGRILK	W					Sample_pep_after+Ab_04.8208.8208.2
21	Q84KL5	Alpha-farnesene synthase OS=Pinus taeda OX=3352 GN=PT5 PE=1 SV=1	40	65899	1	1	1	1	990	7086	1	1	1	522.334	1042.65	2	1042.65	-0.0002	0	39.98	0.017	D	IPLPLHILQ	E					Sample_pep_after+Ab_04.11912.11912.2
22	P68526	ATP synthase subunit a OS=Triticum timopheevii OX=4570 GN=ATP6 PE=3 SV=1	40	42965	1	1	1	1	510	2116	1	1	1	457.289	912.564	2	912.564	-0.0002	0	39.65	0.036	I	AGVTIVLQI	E					Sample_pep_after+Ab_04.5544.5544.2
23	I1L3T1	UDP-glycosyltransferase 708D1 OS=Glycine max OX=3847 GN=UGT708D1 PE=1 SV=1	38	52482	1	1	1	1	523	7339	1	1	1	458.305	914.595	2	914.595	-0.0004	0	37.5	0.012	S	LHLLPPIL	S					Sample_pep_after+Ab_04.12192.12192.2
24	Q7XIZ1	Glutaredoxin-C9 OS=Oryza sativa subsp. japonica OX=39947 GN=GRXC9 PE=3 SV=1	38	20756	1	1	1	1	523	7339	1	0	1	458.305	914.595	2	914.595	-0.0004	0	37.5	0.012	I	HLLLPPLI	A					Sample_pep_after+Ab_04.12192.12192.2
24	Q7XIZ1	Glutaredoxin-C9 OS=Oryza sativa subsp. japonica OX=39947 GN=GRXC9 PE=3 SV=1	38	20756	1	1	1	1	523	7339	1	0	1	458.305	914.595	2	914.595	-0.0004	0	37.5	0.012	I	HLLLPPLI	A					Sample_pep_after+Ab_04.12192.12192.2
