# Supplementary material for: Detection of gluten peptides in human duodenal fluids with immuno-liquid chromatography-mass spectrometry
Source: Royal Society of Chemistry journal article supplement (doi:10.1039/d4ay00852a), 2024-01-01
Supplement: d4ay00852a8.xlsx [file d4ay00852a8.xlsx]

## Sheet: F088459
Header	--------------------------------------------------------
Search title	Sample_pep_after+Ab_05.raw
Timestamp	2020-04-20T13:01:36Z
User	proto
Email
Report URI	http://proteomics.dor.ch.nestle.com/mascot/cgi/master_results.pl?file=../data/20200420/F088459.dat
Peak list data path	\\cnfs.nihs.ch.nestle.com\msdata\Backup_Sirius\2020_04_15_DeepProteome_HumanMilk\Sample_pep_after+Ab_05.raw
Peak list format	Mascot generic
Search type	MIS
Mascot version	2001-06-02
Database	SP2019_05_All
Fasta file	SP2019_05_All_20190520.fasta
Total sequences	560118
Total residues	201292445
Sequences after taxonomy filter	39930
Number of queries	9024
Decoy	--------------------------------------------------------
PSM count in target above identity threshold	20
PSM count in decoy above identity threshold	18
Sequence count in target above identity threshold	20
Sequence count in decoy above identity threshold	17
PSM count in target above homology threshold	76
PSM count in decoy above homology threshold	37
Sequence count in target above homology threshold	72
Sequence count in decoy above homology threshold	35
PSM FDR using homology threshold	48.68
PSM FDR using identity threshold	90
Sequence FDR using homology threshold	48.61
Sequence FDR using identity threshold	85
Protein family member count in target	31
Protein family member count in decoy	19
Protein false discovery rate	61.29
Variable modifications	--------------------------------------------------------
Identifier	Name	Delta	Neutral loss(es)
1	Deamidated (NQ)	0.984016
2	Oxidation (M)	15.9949	0	63.9983
Search Parameters	--------------------------------------------------------
Taxonomy filter	. . . . Viridiplantae (Green Plants)
Enzyme	None
Maximum Missed Cleavages	0
Fixed modifications
Variable modifications	Deamidated (NQ),Oxidation (M)
Peptide Mass Tolerance	5
Peptide Mass Tolerance Units	ppm
Fragment Mass Tolerance	0.6
Fragment Mass Tolerance Units	Da
Mass values	Monoisotopic
Instrument type	ESI-TRAP
Decoy database also searched	1
Format parameters	--------------------------------------------------------
Significance threshold	0.05
Target FDR (overrides sig. threshold)	0
Target FDR type	psm
Max. number of hits	0
Min. number of sig. unique sequences	1
Use MudPIT protein scoring	1
Ions score cut-off	-1
Include same-set proteins	0
Include sub-set proteins	0
Include unassigned	0
Require bold red	0
Use homology threshold	0
Group protein families	0
Re-score using Percolator	0
Show duplicate peptides	1
Protein hits	--------------------------------------------------------
prot_hit_num	prot_acc	prot_desc	prot_score	prot_mass	prot_matches	prot_matches_sig	prot_sequences	prot_sequences_sig	pep_query	pep_index	pep_rank	pep_isbold	pep_isunique	pep_exp_mz	pep_exp_mr	pep_exp_z	pep_calc_mr	pep_delta	pep_miss	pep_score	pep_expect	pep_res_before	pep_seq	pep_res_after	pep_var_mod	pep_var_mod_pos	pep_summed_mod_pos	pep_local_mod_pos	pep_scan_title
1	P18573	Alpha/beta-gliadin MM1 OS=Triticum aestivum OX=4565 PE=1 SV=1	104	35375	3	3	3	3	6717	1927	1	1	1	819.76	2456.26	3	2456.25	0.0076	0	49.06	0.029	A	IILHQQQQQQQQQQQQPLSQ	V					Sample_pep_after+Ab_05.4278.4278.3
1	P18573	Alpha/beta-gliadin MM1 OS=Triticum aestivum OX=4565 PE=1 SV=1	104	35375	3	3	3	3	7567	5948	1	1	1	987.87	2960.59	3	2960.58	0.0048	0	65.21	0.00055	A	VRVPVPQLQPQNPSQQQPQEQVPLVQ	Q					Sample_pep_after+Ab_05.9571.9571.3
1	P18573	Alpha/beta-gliadin MM1 OS=Triticum aestivum OX=4565 PE=1 SV=1	104	35375	3	3	3	3	7918	5774	1	1	1	1115.93	3344.78	3	3344.76	0.0163	0	50.78	0.021	A	VRVPVPQLQPQNPSQQQPQEQVPLVQQQQ	F					Sample_pep_after+Ab_05.9373.9373.3
2	P0C030	Ubiquitin-NEDD8-like protein RUB1 OS=Oryza sativa subsp. japonica OX=39947 GN=RUB1 PE=2 SV=2	71	17119	1	1	1	1	1660	3288	1	1	1	534.314	1066.61	2	1066.61	-0.0001	0	71.34	2e-05	K	ESTLHLVLR	L					Sample_pep_after+Ab_05.5974.5974.2
3	P21292	Gamma-gliadin OS=Triticum aestivum OX=4565 PE=3 SV=1	60	34278	2	2	2	2	6083	6132	6	1	1	1073.52	2145.03	2	2145.03	0.0029	0	50.61	0.016	Q	QPQQPFPQPQQPQQPFPQ	S	Deamidated (NQ)	0.000000000010000000.0			Sample_pep_after+Ab_05.9775.9775.2
3	P21292	Gamma-gliadin OS=Triticum aestivum OX=4565 PE=3 SV=1	60	34278	2	2	2	2	8589	6372	1	1	1	1163.78	4651.09	4	4651.11	-0.0191	0	46.54	0.047	Q	QPQQPFPQPQQQFPQPQQPQQSFPQQQQPAIQSFLQQQM	N	8 Deamidated (NQ)	0.000000000000000000001000111100010001100.0			Sample_pep_after+Ab_05.10051.10051.4
4	P35450	Elongation factor G, chloroplastic (Fragment) OS=Pisum sativum OX=3888 GN=fusA PE=1 SV=2	58	15967	1	1	1	1	2442	1894	1	1	1	628.329	1254.64	2	1254.64	0.0035	0	58.09	0.001	R	NIGIMAHIDAGK	T	Oxidation (M)	0.000020000000.0			Sample_pep_after+Ab_05.4241.4241.2
5	P17991	C-hordein (Fragment) OS=Hordeum vulgare OX=4513 PE=2 SV=1	58	8584	1	1	1	1	6083	6132	1	0	1	1073.52	2145.03	2	2145.03	0.0029	0	57.91	0.0031	L	QPQQPFPQQPQQPFPQPQ	Q	Deamidated (NQ)	0.000000000000000001.0			Sample_pep_after+Ab_05.9775.9775.2
6	Q769E5	Vacuolar cation/proton exchanger 1a OS=Oryza sativa subsp. japonica OX=39947 GN=CAX1a PE=1 SV=1	52	47676	1	1	1	1	1806	4362	1	1	1	550.838	1099.66	2	1099.66	0.0009	0	51.82	0.0023	L	KNKLDITLGV	A					Sample_pep_after+Ab_05.7195.7195.2
7	Q9C9H6	Receptor-like protein 11 OS=Arabidopsis thaliana OX=3702 GN=RLP11 PE=3 SV=1	52	88675	1	1	1	1	1806	4362	2	0	1	550.838	1099.66	2	1099.66	0.0009	0	51.76	0.0023	S	KLQNLILTR	N	2 Deamidated (NQ)	0.001100000.0			Sample_pep_after+Ab_05.7195.7195.2
8	P0CG89	Histone H4 OS=Glycine max OX=3847 PE=3 SV=1	50	11402	1	1	1	1	2745	5460	1	1	1	663.852	1325.69	2	1325.69	0.0004	0	50.24	0.0072	K	TVTAMDVVYALK	R	Oxidation (M)	0.000020000000.0			Sample_pep_after+Ab_05.8997.8997.2
9	Q6YXK6	30S ribosomal protein S19, chloroplastic OS=Physcomitrella patens subsp. patens OX=3218 GN=rps19 PE=3 SV=1	50	10604	1	1	1	1	1806	4362	3	0	1	550.838	1099.66	2	1099.66	0.0009	0	50.15	0.0034	K	KIEDLNLKK	E					Sample_pep_after+Ab_05.7195.7195.2
10	P04723	Alpha/beta-gliadin A-III OS=Triticum aestivum OX=4565 PE=2 SV=1	50	32216	1	1	1	1	7468	5698	1	1	1	961.175	2880.5	3	2880.49	0.0124	0	49.83	0.026	A	VRVPVPQLQPQNPSQQQPQEQVPLM	Q	Oxidation (M)	0.0000000000000000000000002.0			Sample_pep_after+Ab_05.9285.9285.3
11	Q9M9L8	Lon protease homolog 3, mitochondrial OS=Arabidopsis thaliana OX=3702 GN=LON3 PE=3 SV=1	48	103411	1	1	1	1	1806	4362	4	0	1	550.838	1099.66	2	1099.66	0.0009	0	48.2	0.0053	K	KQVEINKIK	E	Deamidated (NQ)	0.010000000.0			Sample_pep_after+Ab_05.7195.7195.2
12	A6H5M2	30S ribosomal protein S19, chloroplastic OS=Cycas taitungensis OX=54799 GN=rps19 PE=3 SV=1	48	10437	1	1	1	1	1806	4362	5	0	1	550.838	1099.66	2	1099.66	0.0009	0	48.03	0.0055	R	KIENLNIKK	E	Deamidated (NQ)	0.000100000.0			Sample_pep_after+Ab_05.7195.7195.2
13	P06377	30S ribosomal protein S19, chloroplastic OS=Marchantia polymorpha OX=3197 GN=rps19 PE=3 SV=3	48	10547	1	1	1	1	1806	4362	5	0	1	550.838	1099.66	2	1099.66	0.0009	0	48.03	0.0055	K	KIENLNLKK	E	Deamidated (NQ)	0.000100000.0			Sample_pep_after+Ab_05.7195.7195.2
14	Q9M886	LOB domain-containing protein 41 OS=Arabidopsis thaliana OX=3702 GN=LBD41 PE=2 SV=1	48	28399	1	1	1	1	1806	4362	7	0	1	550.838	1099.66	2	1099.66	0.0009	0	47.79	0.0059	G	EIKLDLTLR	L					Sample_pep_after+Ab_05.7195.7195.2
15	Q6K5G8	Glyceraldehyde-3-phosphate dehydrogenase 3, cytosolic OS=Oryza sativa subsp. japonica OX=39947 GN=GAPC3 PE=2 SV=1	47	36545	1	1	1	1	747	1357	1	1	1	436.745	871.476	2	871.476	-0.0002	0	46.87	0.02	F	RVPTVDVS	V					Sample_pep_after+Ab_05.3627.3627.2
16	P0C539	Actin-2 OS=Oryza sativa subsp. indica OX=39946 GN=ACT2 PE=3 SV=1	46	41653	1	1	1	1	1237	987	1	1	1	488.728	975.441	2	975.441	0.0002	0	45.75	0.022	K	AGFAGDDAPR	A					Sample_pep_after+Ab_05.3210.3210.2
17	P22200	Pyruvate kinase, cytosolic isozyme OS=Solanum tuberosum OX=4113 PE=2 SV=1	45	55135	1	1	1	1	905	379	1	1	1	458.248	914.482	2	914.482	0.0003	0	45.29	0.027	L	DTKGPEIR	T					Sample_pep_after+Ab_05.2526.2526.2
18	Q9SAB6	Cytochrome P450 71A18 OS=Arabidopsis thaliana OX=3702 GN=CYP71A18 PE=3 SV=2	45	56241	1	1	1	1	1732	409	1	1	1	543.836	1085.66	2	1085.66	-0.0033	0	45.01	0.0085	H	FGRVPILVVS	S					Sample_pep_after+Ab_05.2560.2560.2
19	P04730	Gamma-gliadin (Fragment) OS=Triticum aestivum OX=4565 PE=2 SV=1	44	27320	1	1	1	1	1563	3113	1	1	1	524.301	1046.59	2	1046.59	-0.0004	0	43.97	0.022	F	LQPHQIAQL	E					Sample_pep_after+Ab_05.5778.5778.2
20	A0A1D6IEG9	Pentatricopeptide repeat-containing protein CRP1, chloroplastic OS=Zea mays OX=4577 GN=CRP1 PE=1 SV=1	41	73177	1	1	1	1	2649	3598	1	1	1	652.876	1303.74	2	1303.74	-0.0011	0	41.47	0.036	V	SILVLNSLINAF	G	Deamidated (NQ)	0.000000000100.0			Sample_pep_after+Ab_05.6323.6323.2
21	I1L3T1	UDP-glycosyltransferase 708D1 OS=Glycine max OX=3847 GN=UGT708D1 PE=1 SV=1	41	52482	1	1	1	1	909	7597	1	1	1	458.305	914.596	2	914.595	0.0003	0	41.36	0.0051	S	LHLLPPIL	S					Sample_pep_after+Ab_05.11560.11560.2
22	Q7XIZ1	Glutaredoxin-C9 OS=Oryza sativa subsp. japonica OX=39947 GN=GRXC9 PE=3 SV=1	41	20756	1	1	1	1	909	7597	1	0	1	458.305	914.596	2	914.595	0.0003	0	41.36	0.0051	I	HLLLPPLI	A					Sample_pep_after+Ab_05.11560.11560.2
23	Q9LMP7	Golgi SNAP receptor complex member 1-1 OS=Arabidopsis thaliana OX=3702 GN=GOS11 PE=2 SV=1	41	25198	1	1	1	1	1058	6385	1	1	1	472.787	943.559	2	943.559	0.0002	0	40.56	0.035	M	DTIILSLVA	A					Sample_pep_after+Ab_05.10066.10066.2
24	Q9SZL9	Cellulose synthase-like protein D4 OS=Arabidopsis thaliana OX=3702 GN=CSLD4 PE=2 SV=1	41	124515	1	1	1	1	1058	6385	1	0	1	472.787	943.559	2	943.559	0.0002	0	40.56	0.035	A	NTILSILAV	D	Deamidated (NQ)	0.100000000.0			Sample_pep_after+Ab_05.10066.10066.2
25	O49323	Cellulose synthase-like protein D1 OS=Arabidopsis thaliana OX=3702 GN=CSLD1 PE=2 SV=1	41	115993	1	1	1	1	1058	6385	1	0	1	472.787	943.559	2	943.559	0.0002	0	40.56	0.035	A	NTLLSILAV	D	Deamidated (NQ)	0.100000000.0			Sample_pep_after+Ab_05.10066.10066.2
26	Q8RX83	Cellulose synthase-like protein B3 OS=Arabidopsis thaliana OX=3702 GN=CSLB3 PE=2 SV=1	41	84834	1	1	1	1	1058	6385	1	0	1	472.787	943.559	2	943.559	0.0002	0	40.56	0.035	A	NTLLSLLAV	N	Deamidated (NQ)	0.100000000.0			Sample_pep_after+Ab_05.10066.10066.2
27	P68526	ATP synthase subunit a OS=Triticum timopheevii OX=4570 GN=ATP6 PE=3 SV=1	40	42965	1	1	1	1	895	2279	1	1	1	457.289	912.564	2	912.564	-0.0004	0	40.2	0.032	I	AGVTIVLQI	E					Sample_pep_after+Ab_05.4674.4674.2
28	Q27IK6	Kinesin-like protein KIN-12D OS=Arabidopsis thaliana OX=3702 GN=KIN12D PE=2 SV=1	38	314865	1	1	1	1	1732	409	2	0	1	543.836	1085.66	2	1085.66	0.0008	0	38.28	0.04	Q	KKRGISLVGE	K					Sample_pep_after+Ab_05.2560.2560.2
29	Q39528	Agglutinin-1 OS=Cladrastis kentukea OX=38412 PE=1 SV=1	34	32108	1	1	1	1	772	6450	1	1	1	440.796	879.578	2	879.579	-0.0011	0	34.49	0.011	K	KPLSLPLL	A					Sample_pep_after+Ab_05.10141.10141.2
30	Q39529	Agglutinin-2 OS=Cladrastis kentukea OX=38412 PE=1 SV=1	34	31984	1	1	1	1	772	6450	1	0	1	440.796	879.578	2	879.579	-0.0011	0	34.49	0.011	K	KPISLPLL	A					Sample_pep_after+Ab_05.10141.10141.2
31	Q9SW08	ABC transporter G family member 4 OS=Arabidopsis thaliana OX=3702 GN=ABCG4 PE=3 SV=1	33	64649	1	1	1	1	772	6450	3	0	1	440.796	879.578	2	879.579	-0.0011	0	33.34	0.014	A	KPLSPLLL	T					Sample_pep_after+Ab_05.10141.10141.2
31	Q9SW08	ABC transporter G family member 4 OS=Arabidopsis thaliana OX=3702 GN=ABCG4 PE=3 SV=1	33	64649	1	1	1	1	772	6450	3	0	1	440.796	879.578	2	879.579	-0.0011	0	33.34	0.014	A	KPLSPLLL	T					Sample_pep_after+Ab_05.10141.10141.2
