# Supplementary material for: Detection of gluten peptides in human duodenal fluids with immuno-liquid chromatography-mass spectrometry
Source: Royal Society of Chemistry journal article supplement (doi:10.1039/d4ay00852a), 2024-01-01
Supplement: d4ay00852a9.xlsx [file d4ay00852a9.xlsx]

## Sheet: F088460
Header	--------------------------------------------------------
Search title	Sample_pep_after+Ab_06.raw
Timestamp	2020-04-20T13:30:19Z
User	proto
Email
Report URI	http://proteomics.dor.ch.nestle.com/mascot/cgi/master_results.pl?file=../data/20200420/F088460.dat
Peak list data path	\\cnfs.nihs.ch.nestle.com\msdata\Backup_Sirius\2020_04_15_DeepProteome_HumanMilk\Sample_pep_after+Ab_06.raw
Peak list format	Mascot generic
Search type	MIS
Mascot version	2001-06-02
Database	SP2019_05_All
Fasta file	SP2019_05_All_20190520.fasta
Total sequences	560118
Total residues	201292445
Sequences after taxonomy filter	39930
Number of queries	7802
Decoy	--------------------------------------------------------
PSM count in target above identity threshold	20
PSM count in decoy above identity threshold	10
Sequence count in target above identity threshold	20
Sequence count in decoy above identity threshold	10
PSM count in target above homology threshold	63
PSM count in decoy above homology threshold	39
Sequence count in target above homology threshold	63
Sequence count in decoy above homology threshold	39
PSM FDR using homology threshold	61.9
PSM FDR using identity threshold	50
Sequence FDR using homology threshold	61.9
Sequence FDR using identity threshold	50
Protein family member count in target	28
Protein family member count in decoy	15
Protein false discovery rate	53.57
Variable modifications	--------------------------------------------------------
Identifier	Name	Delta	Neutral loss(es)
1	Deamidated (NQ)	0.984016
2	Oxidation (M)	15.9949	0	63.9983
Search Parameters	--------------------------------------------------------
Taxonomy filter	. . . . Viridiplantae (Green Plants)
Enzyme	None
Maximum Missed Cleavages	0
Fixed modifications
Variable modifications	Deamidated (NQ),Oxidation (M)
Peptide Mass Tolerance	5
Peptide Mass Tolerance Units	ppm
Fragment Mass Tolerance	0.6
Fragment Mass Tolerance Units	Da
Mass values	Monoisotopic
Instrument type	ESI-TRAP
Decoy database also searched	1
Format parameters	--------------------------------------------------------
Significance threshold	0.05
Target FDR (overrides sig. threshold)	0
Target FDR type	psm
Max. number of hits	0
Min. number of sig. unique sequences	1
Use MudPIT protein scoring	1
Ions score cut-off	-1
Include same-set proteins	0
Include sub-set proteins	0
Include unassigned	0
Require bold red	0
Use homology threshold	0
Group protein families	0
Re-score using Percolator	0
Show duplicate peptides	1
Protein hits	--------------------------------------------------------
prot_hit_num	prot_acc	prot_desc	prot_score	prot_mass	prot_matches	prot_matches_sig	prot_sequences	prot_sequences_sig	pep_query	pep_index	pep_rank	pep_isbold	pep_isunique	pep_exp_mz	pep_exp_mr	pep_exp_z	pep_calc_mr	pep_delta	pep_miss	pep_score	pep_expect	pep_res_before	pep_seq	pep_res_after	pep_var_mod	pep_var_mod_pos	pep_summed_mod_pos	pep_local_mod_pos	pep_scan_title
1	P04721	Alpha/beta-gliadin A-I OS=Triticum aestivum OX=4565 PE=2 SV=1	112	30384	2	2	2	2	6768	5530	1	1	1	987.872	2960.59	3	2960.58	0.011	0	71.33	0.00013	A	VRVPVPQLQPQNPSQQQPQEQVPLVQ	Q					Sample_pep_after+Ab_06.9498.9498.3
1	P04721	Alpha/beta-gliadin A-I OS=Triticum aestivum OX=4565 PE=2 SV=1	112	30384	2	2	2	2	7176	5717	1	1	1	873.965	3491.83	4	3491.83	0.0014	0	68.72	0.00042	A	VRVPVPQLQPQNPSQQQPQEQVPLVQQQQF	L					Sample_pep_after+Ab_06.9704.9704.4
2	P0C030	Ubiquitin-NEDD8-like protein RUB1 OS=Oryza sativa subsp. japonica OX=39947 GN=RUB1 PE=2 SV=2	89	17119	3	3	3	3	434	2937	1	1	1	426.277	850.539	2	850.539	-0.0003	0	30.59	0.048	S	TLHLVLR	L					Sample_pep_after+Ab_06.5989.5989.2
2	P0C030	Ubiquitin-NEDD8-like protein RUB1 OS=Oryza sativa subsp. japonica OX=39947 GN=RUB1 PE=2 SV=2	89	17119	3	3	3	3	704	2938	1	1	1	469.793	937.571	2	937.571	-0.0003	0	39.38	0.012	E	STLHLVLR	L					Sample_pep_after+Ab_06.5990.5990.2
2	P0C030	Ubiquitin-NEDD8-like protein RUB1 OS=Oryza sativa subsp. japonica OX=39947 GN=RUB1 PE=2 SV=2	89	17119	3	3	3	3	1242	2927	1	1	1	534.314	1066.61	2	1066.61	0.0003	0	75.34	8e-06	K	ESTLHLVLR	L					Sample_pep_after+Ab_06.5978.5978.2
3	P17991	C-hordein (Fragment) OS=Hordeum vulgare OX=4513 PE=2 SV=1	86	8584	1	1	1	1	5952	7337	1	1	1	1185.59	2369.16	2	2369.16	0.0069	0	86.22	5.3e-06	L	QPQQPFPQQPQQPFPQPQQP	F					Sample_pep_after+Ab_06.12526.12526.2
4	P0CG89	Histone H4 OS=Glycine max OX=3847 PE=3 SV=1	65	11402	2	2	2	2	1703	3681	1	1	1	590.815	1179.62	2	1179.61	0.0014	0	42.88	0.041	R	ISGLIYEETR	G					Sample_pep_after+Ab_06.6834.6834.2
4	P0CG89	Histone H4 OS=Glycine max OX=3847 PE=3 SV=1	65	11402	2	2	2	2	2297	5050	1	1	1	663.853	1325.69	2	1325.69	0.0006	0	54.54	0.0026	K	TVTAMDVVYALK	R	Oxidation (M)	0.000020000000.0			Sample_pep_after+Ab_06.8938.8938.2
5	Q9M9L8	Lon protease homolog 3, mitochondrial OS=Arabidopsis thaliana OX=3702 GN=LON3 PE=3 SV=1	55	103411	1	1	1	1	1368	4006	1	1	1	550.838	1099.66	2	1099.66	0.0015	0	54.74	0.0012	K	KQVEINKIK	E	Deamidated (NQ)	0.010000000.0			Sample_pep_after+Ab_06.7203.7203.2
6	O65316	Actin OS=Mesostigma viride OX=41882 PE=3 SV=1	53	41563	1	1	1	1	4503	5653	1	1	1	895.95	1789.89	2	1789.88	0.0017	0	52.97	0.0083	K	SYELPDGQVITIGNER	F					Sample_pep_after+Ab_06.9635.9635.2
7	Q9C9H6	Receptor-like protein 11 OS=Arabidopsis thaliana OX=3702 GN=RLP11 PE=3 SV=1	52	88675	1	1	1	1	1368	4006	2	0	1	550.838	1099.66	2	1099.66	0.0015	0	51.73	0.0024	S	KLQNLILTR	N	2 Deamidated (NQ)	0.001100000.0			Sample_pep_after+Ab_06.7203.7203.2
8	P08453	Gamma-gliadin OS=Triticum aestivum OX=4565 PE=3 SV=1	51	37099	1	1	1	1	5004	7116	1	1	1	962.964	1923.91	2	1923.91	0.0019	0	51.01	0.013	Q	QPFPQQPQQPFPQTQQ	P	Deamidated (NQ)	0.0000000000000001.0			Sample_pep_after+Ab_06.12230.12230.2
9	Q6YXK6	30S ribosomal protein S19, chloroplastic OS=Physcomitrella patens subsp. patens OX=3218 GN=rps19 PE=3 SV=1	49	10604	1	1	1	1	1368	4006	3	0	1	550.838	1099.66	2	1099.66	0.0015	0	48.91	0.0045	K	KIEDLNLKK	E					Sample_pep_after+Ab_06.7203.7203.2
10	Q9M886	LOB domain-containing protein 41 OS=Arabidopsis thaliana OX=3702 GN=LBD41 PE=2 SV=1	48	28399	1	1	1	1	1368	4006	4	0	1	550.838	1099.66	2	1099.66	0.0015	0	48.41	0.0051	G	EIKLDLTLR	L					Sample_pep_after+Ab_06.7203.7203.2
11	P35450	Elongation factor G, chloroplastic (Fragment) OS=Pisum sativum OX=3888 GN=fusA PE=1 SV=2	48	15967	1	1	1	1	1970	1576	1	1	1	628.328	1254.64	2	1254.64	0.0023	0	47.77	0.015	R	NIGIMAHIDAGK	T	Oxidation (M)	0.000020000000.0			Sample_pep_after+Ab_06.4279.4279.2
12	P04730	Gamma-gliadin (Fragment) OS=Triticum aestivum OX=4565 PE=2 SV=1	48	27320	1	1	1	1	1149	2775	1	1	1	524.301	1046.59	2	1046.59	-0.0006	0	47.59	0.0096	F	LQPHQIAQL	E					Sample_pep_after+Ab_06.5806.5806.2
13	A6H5M2	30S ribosomal protein S19, chloroplastic OS=Cycas taitungensis OX=54799 GN=rps19 PE=3 SV=1	47	10437	1	1	1	1	1368	4006	5	0	1	550.838	1099.66	2	1099.66	0.0015	0	46.85	0.0073	R	KIENLNIKK	E	Deamidated (NQ)	0.000100000.0			Sample_pep_after+Ab_06.7203.7203.2
14	P06377	30S ribosomal protein S19, chloroplastic OS=Marchantia polymorpha OX=3197 GN=rps19 PE=3 SV=3	47	10547	1	1	1	1	1368	4006	5	0	1	550.838	1099.66	2	1099.66	0.0015	0	46.85	0.0073	K	KIENLNLKK	E	Deamidated (NQ)	0.000100000.0			Sample_pep_after+Ab_06.7203.7203.2
15	Q769E5	Vacuolar cation/proton exchanger 1a OS=Oryza sativa subsp. japonica OX=39947 GN=CAX1a PE=1 SV=1	45	47676	1	1	1	1	1368	4006	7	0	1	550.838	1099.66	2	1099.66	0.0015	0	44.93	0.011	L	KNKLDITLGV	A					Sample_pep_after+Ab_06.7203.7203.2
16	Q9FFD8	Protein METHYLENE BLUE SENSITIVITY 2 OS=Arabidopsis thaliana OX=3702 GN=MBS2 PE=1 SV=1	42	11232	1	1	1	1	608	1945	1	1	1	457.289	912.564	2	912.564	-0.0006	0	41.76	0.022	C	KITVPDLK	T					Sample_pep_after+Ab_06.4712.4712.2
17	Q7PC76	Glucomannan 4-beta-mannosyltransferase 1 OS=Oryza sativa subsp. japonica OX=39947 GN=CSLA1 PE=1 SV=1	41	59408	1	1	1	1	714	4119	1	1	1	471.293	940.571	2	940.571	0.0003	0	40.94	0.025	T	LIGLLEAGR	A					Sample_pep_after+Ab_06.7329.7329.2
18	P68526	ATP synthase subunit a OS=Triticum timopheevii OX=4570 GN=ATP6 PE=3 SV=1	40	42965	1	1	1	1	608	1945	2	0	1	457.289	912.564	2	912.564	-0.0006	0	39.8	0.034	I	AGVTIVLQI	E					Sample_pep_after+Ab_06.4712.4712.2
19	Q9LMP7	Golgi SNAP receptor complex member 1-1 OS=Arabidopsis thaliana OX=3702 GN=GOS11 PE=2 SV=1	40	25198	1	1	1	1	729	5779	1	1	1	472.787	943.559	2	943.559	-0.0002	0	39.6	0.04	M	DTIILSLVA	A					Sample_pep_after+Ab_06.9777.9777.2
20	Q39528	Agglutinin-1 OS=Cladrastis kentukea OX=38412 PE=1 SV=1	39	32108	1	1	1	1	510	5799	1	1	1	440.797	879.579	2	879.579	-0.0001	0	39.23	0.0035	K	KPLSLPLL	A					Sample_pep_after+Ab_06.9800.9800.2
21	Q39529	Agglutinin-2 OS=Cladrastis kentukea OX=38412 PE=1 SV=1	39	31984	1	1	1	1	510	5799	1	0	1	440.797	879.579	2	879.579	-0.0001	0	39.23	0.0035	K	KPISLPLL	A					Sample_pep_after+Ab_06.9800.9800.2
22	O80970	BTB/POZ domain-containing protein NPY2 OS=Arabidopsis thaliana OX=3702 GN=NPY2 PE=2 SV=1	39	70149	1	1	1	1	1368	4006	8	0	1	550.838	1099.66	2	1099.66	0.0015	0	39.11	0.043	L	KSEIAALKLQ	E					Sample_pep_after+Ab_06.7203.7203.2
23	I1L3T1	UDP-glycosyltransferase 708D1 OS=Glycine max OX=3847 GN=UGT708D1 PE=1 SV=1	37	52482	1	1	1	1	616	6604	1	1	1	458.305	914.595	2	914.595	0	0	37.15	0.013	S	LHLLPPIL	S					Sample_pep_after+Ab_06.10838.10838.2
24	Q7XIZ1	Glutaredoxin-C9 OS=Oryza sativa subsp. japonica OX=39947 GN=GRXC9 PE=3 SV=1	37	20756	1	1	1	1	616	6604	1	0	1	458.305	914.595	2	914.595	0	0	37.15	0.013	I	HLLLPPLI	A					Sample_pep_after+Ab_06.10838.10838.2
25	Q9FHH2	Protein SUPPRESSOR OF MAX2 1 OS=Arabidopsis thaliana OX=3702 GN=SMAX1 PE=1 SV=1	37	108642	1	1	1	1	2504	1920	1	1	1	689.913	1377.81	2	1377.81	-0.0014	0	36.72	0.036	A	QPKQLPQWLLK	A					Sample_pep_after+Ab_06.4680.4680.2
26	Q9SW08	ABC transporter G family member 4 OS=Arabidopsis thaliana OX=3702 GN=ABCG4 PE=3 SV=1	34	64649	1	1	1	1	510	5799	3	0	1	440.797	879.579	2	879.579	-0.0001	0	33.69	0.013	A	KPLSPLLL	T					Sample_pep_after+Ab_06.9800.9800.2
27	Q7XA74	Inactive GDSL esterase/lipase-like protein 25 OS=Arabidopsis thaliana OX=3702 GN=MVP1 PE=1 SV=1	29	46053	1	1	1	1	510	5799	4	0	1	440.797	879.579	2	879.579	-0.0001	0	28.65	0.041	I	PKISPILL	T					Sample_pep_after+Ab_06.9800.9800.2
28	Q9SW44	DEAD-box ATP-dependent RNA helicase 16 OS=Arabidopsis thaliana OX=3702 GN=RH16 PE=2 SV=1	27	69459	1	1	1	1	3845	6502	1	1	1	823.026	1644.04	2	1644.03	0.0043	0	27.15	0.044	D	VEKLKKLILHNPIV	L	Deamidated (NQ)	0.00000000001000.0			Sample_pep_after+Ab_06.10682.10682.2
28	Q9SW44	DEAD-box ATP-dependent RNA helicase 16 OS=Arabidopsis thaliana OX=3702 GN=RH16 PE=2 SV=1	27	69459	1	1	1	1	3845	6502	1	1	1	823.026	1644.04	2	1644.03	0.0043	0	27.15	0.044	D	VEKLKKLILHNPIV	L	Deamidated (NQ)	0.00000000001000.0			Sample_pep_after+Ab_06.10682.10682.2
