# Supplementary material for: Detection of gluten peptides in human duodenal fluids with immuno-liquid chromatography-mass spectrometry
Source: Royal Society of Chemistry journal article supplement (doi:10.1039/d4ay00852a), 2024-01-01
Supplement: d4ay00852a10.xlsx [file d4ay00852a10.xlsx]

## Sheet: F088462
Header	--------------------------------------------------------
Search title	Sample_pep_after+Ab_07.raw
Timestamp	2020-04-20T14:15:24Z
User	proto
Email
Report URI	http://proteomics.dor.ch.nestle.com/mascot/cgi/master_results.pl?file=../data/20200420/F088462.dat
Peak list data path	\\cnfs.nihs.ch.nestle.com\msdata\Backup_Sirius\2020_04_15_DeepProteome_HumanMilk\Sample_pep_after+Ab_07.raw
Peak list format	Mascot generic
Search type	MIS
Mascot version	2001-06-02
Database	SP2019_05_All
Fasta file	SP2019_05_All_20190520.fasta
Total sequences	560118
Total residues	201292445
Sequences after taxonomy filter	39930
Number of queries	6199
Decoy	--------------------------------------------------------
PSM count in target above identity threshold	7
PSM count in decoy above identity threshold	2
Sequence count in target above identity threshold	7
Sequence count in decoy above identity threshold	2
PSM count in target above homology threshold	21
PSM count in decoy above homology threshold	15
Sequence count in target above homology threshold	19
Sequence count in decoy above homology threshold	14
PSM FDR using homology threshold	71.43
PSM FDR using identity threshold	28.57
Sequence FDR using homology threshold	73.68
Sequence FDR using identity threshold	28.57
Protein family member count in target	6
Protein family member count in decoy	2
Protein false discovery rate	33.33
Variable modifications	--------------------------------------------------------
Identifier	Name	Delta	Neutral loss(es)
1	Deamidated (NQ)	0.984016
2	Oxidation (M)	15.9949	0	63.9983
Search Parameters	--------------------------------------------------------
Taxonomy filter	. . . . Viridiplantae (Green Plants)
Enzyme	None
Maximum Missed Cleavages	0
Fixed modifications
Variable modifications	Deamidated (NQ),Oxidation (M)
Peptide Mass Tolerance	5
Peptide Mass Tolerance Units	ppm
Fragment Mass Tolerance	0.6
Fragment Mass Tolerance Units	Da
Mass values	Monoisotopic
Instrument type	ESI-TRAP
Decoy database also searched	1
Format parameters	--------------------------------------------------------
Significance threshold	0.05
Target FDR (overrides sig. threshold)	0
Target FDR type	psm
Max. number of hits	0
Min. number of sig. unique sequences	1
Use MudPIT protein scoring	1
Ions score cut-off	-1
Include same-set proteins	0
Include sub-set proteins	0
Include unassigned	0
Require bold red	0
Use homology threshold	0
Group protein families	0
Re-score using Percolator	0
Show duplicate peptides	1
Protein hits	--------------------------------------------------------
prot_hit_num	prot_acc	prot_desc	prot_score	prot_mass	prot_matches	prot_matches_sig	prot_sequences	prot_sequences_sig	pep_query	pep_index	pep_rank	pep_isbold	pep_isunique	pep_exp_mz	pep_exp_mr	pep_exp_z	pep_calc_mr	pep_delta	pep_miss	pep_score	pep_expect	pep_res_before	pep_seq	pep_res_after	pep_var_mod	pep_var_mod_pos	pep_summed_mod_pos	pep_local_mod_pos	pep_scan_title
1	P0C030	Ubiquitin-NEDD8-like protein RUB1 OS=Oryza sativa subsp. japonica OX=39947 GN=RUB1 PE=2 SV=2	92	17119	3	3	3	3	318	3437	1	1	1	426.277	850.539	2	850.539	0	0	31.04	0.044	S	TLHLVLR	L					Sample_pep_after+Ab_07.6863.6863.2
1	P0C030	Ubiquitin-NEDD8-like protein RUB1 OS=Oryza sativa subsp. japonica OX=39947 GN=RUB1 PE=2 SV=2	92	17119	3	3	3	3	528	3433	1	1	1	469.792	937.57	2	937.571	-0.0007	0	44.6	0.003	E	STLHLVLR	L					Sample_pep_after+Ab_07.6859.6859.2
1	P0C030	Ubiquitin-NEDD8-like protein RUB1 OS=Oryza sativa subsp. japonica OX=39947 GN=RUB1 PE=2 SV=2	92	17119	3	3	3	3	933	3408	1	1	1	534.314	1066.61	2	1066.61	-0.0005	0	65.97	6.9e-05	K	ESTLHLVLR	L					Sample_pep_after+Ab_07.6831.6831.2
2	P18573	Alpha/beta-gliadin MM1 OS=Triticum aestivum OX=4565 PE=1 SV=1	55	35375	1	1	1	1	4831	1690	1	1	1	819.761	2456.26	3	2456.25	0.0084	0	54.91	0.0073	A	IILHQQQQQQQQQQQQPLSQ	V					Sample_pep_after+Ab_07.4617.4617.3
3	P35450	Elongation factor G, chloroplastic (Fragment) OS=Pisum sativum OX=3888 GN=fusA PE=1 SV=2	49	15967	1	1	1	1	1443	1668	1	1	1	628.328	1254.64	2	1254.64	0.0027	0	48.69	0.011	R	NIGIMAHIDAGK	T	Oxidation (M)	0.000020000000.0			Sample_pep_after+Ab_07.4592.4592.2
4	Q6K5G8	Glyceraldehyde-3-phosphate dehydrogenase 3, cytosolic OS=Oryza sativa subsp. japonica OX=39947 GN=GAPC3 PE=2 SV=1	44	36545	1	1	1	1	357	1386	1	1	1	436.745	871.476	2	871.476	-0.0005	0	43.73	0.036	F	RVPTVDVS	V					Sample_pep_after+Ab_07.4264.4264.2
5	Q7XRX3	Heat stress transcription factor B-2a OS=Oryza sativa subsp. japonica OX=39947 GN=HSFB2A PE=2 SV=2	35	32789	1	1	1	1	960	423	1	1	1	540.676	1079.34	2	1079.34	-0.0041	0	34.9	0.0069	E	ENGEDEEEE	E	Deamidated (NQ)	0.010000000.0			Sample_pep_after+Ab_07.2985.2985.2
6	Q9ZRZ8	DEAD-box ATP-dependent RNA helicase 28 OS=Arabidopsis thaliana OX=3702 GN=RH28 PE=2 SV=1	33	89300	1	1	1	1	960	423	2	0	1	540.676	1079.34	2	1079.34	-0.0041	0	32.86	0.011	L	EDNEGEEEE	E	Deamidated (NQ)	0.001000000.0			Sample_pep_after+Ab_07.2985.2985.2
6	Q9ZRZ8	DEAD-box ATP-dependent RNA helicase 28 OS=Arabidopsis thaliana OX=3702 GN=RH28 PE=2 SV=1	33	89300	1	1	1	1	960	423	2	0	1	540.676	1079.34	2	1079.34	-0.0041	0	32.86	0.011	L	EDNEGEEEE	E	Deamidated (NQ)	0.001000000.0			Sample_pep_after+Ab_07.2985.2985.2
